# Supplementary material for: Factors driving the Ni/Cu cooperative asymmetric propargylation of aldimine esters
Source: Royal Society of Chemistry journal article supplement (doi:10.1039/d3cc01309j), 2023-01-01
Supplement: d3cc01309j1.pdf [file d3cc01309j1.pdf]

ELECTRONIC SUPPLEMENTARY INFORMATION

## Factors Driving the Ni/Cu Cooperative Asymmetric Propargylation of Aldimine Esters

Giuseppe Sciortino<sup>†</sup> and Feliu Maseras<sup>†</sup>

<sup>†</sup> Institute of Chemical Research of Catalonia (ICIQ-CERCA), The Barcelona Institute of Science and Technology, Avgda. Països Catalans 16, 43007 Tarragona, Spain.

### Table of contents

|                                                                                               |     |
|-----------------------------------------------------------------------------------------------|-----|
| 1. Computational Details .....                                                                | 2   |
| 2. Coordination and conformational landscape .....                                            | 2   |
| 3. Gibbs Energy Profiles .....                                                                | 3   |
| 3.1 Nickel cycle .....                                                                        | 3   |
| 3.2 Efficiency of the MeCO <sub>2</sub> <sup>-</sup> O-groups toward proton abstraction ..... | 3   |
| 3.3 Alternative copper cycle .....                                                            | 4   |
| 3.4 Supramolecular cycle .....                                                                | 5   |
| 4. Cartesian coordinates and absolute E and G energies .....                                  | 6   |
| 5. References .....                                                                           | 135 |

## 1. Computational Details

Theoretical calculations were performed at DFT level of theory using Gaussian16 software.<sup>1</sup> The structures of all the intermediates and transition states were optimized in dichloromethane solvent (DCM,  $\epsilon = 8.93$ ) with the SMD continuum model<sup>2</sup> using the B3LYP functional<sup>3</sup> combined with the Grimme's D3 correction for dispersion.<sup>4</sup> Basis set BS1 was used for the optimizations. BS1 includes the 6-31G(d,p) basis set for the main group elements,<sup>5</sup> and the scalar relativistic Stuttgart-Dresden SDD pseudopotential and its associated double- $\zeta$  basis set,<sup>6</sup> complemented with a set of polarization functions,<sup>7</sup> for the Ni and Cu atoms. Frequency calculations were carried out for all the optimized geometries in order to characterize the stationary points as either minima or transition states. It was confirmed that transition states connect with the corresponding intermediates by usual intrinsic reaction coordinate (IRC) calculations and subsequent optimization to minima.

Gibbs energies in DCM were calculated at 298.15 K adding to the potential energies in DCM, obtained with single point calculations at using an extended basis set (BS2), the thermal and entropic corrections obtained with BS1. BS2 consists in the *def2-TZVP* basis set for the main group elements<sup>7</sup> and the quadruple- $\zeta$  *def2-QZVP* basis set for Ni and Cu.<sup>8</sup> The final energies given are relative *qh*-Gibbs (quasi-rigid-rotor-harmonic-oscillator).<sup>9</sup> energies in solution at 298.15 K and 1M<sup>10</sup> obtained with a frequency cut-off of 100 cm<sup>-1</sup>.<sup>11</sup> A correction of 1.9 kcal mol<sup>-1</sup> was applied to all Gibbs values to change the standard state from the gas phase (1 atm) to solution (1 M) at 298.15 K.<sup>9</sup>

## 2. Coordination and conformational landscape

### 2.1 Coordination modes and conformational analysis

The coordination mode and conformational landscape of [Ni<sup>0</sup>(L<sub>1</sub>)(S<sub>1</sub>)] and [Cu<sup>I</sup>(L<sub>2</sub>)(S<sub>2</sub>)]<sup>+</sup> were explored and the results are gathered in Table S1. The preferential coordination mode of a [Ni<sup>0</sup>(L<sub>1</sub>)(S<sub>1</sub>)] square planar complex is that with  $\eta^2$  coordination of S<sub>1</sub>. S<sub>1</sub>- $\kappa$ O and S<sub>1</sub>- $\kappa$ O' coordination shown relative  $\Delta G_{\text{DCM}}$  of 35.0 and 37.6 kcal·mol<sup>-1</sup>, respectively. [Cu<sup>I</sup>(L<sub>2</sub>)(S<sub>2</sub>)]<sup>+</sup> displays two possible coordination isomers, SS-15-A and SS-15-C with relative  $\Delta G_{\text{DCM}}$  of 1.6 kcal·mol<sup>-1</sup>. Moreover, SS-15-A have an additional low energy isomer with S<sub>1</sub>- $\kappa$ N,O' at 1.8 kcal·mol<sup>-1</sup> (Fig. S1). The same conformational isomer is hindered for the SS-15-C isomer due to steric clashes between the benzyl and the FeCp<sub>2</sub> groups.

**Table S1.** DFT (B3LYP-D3 in DCM) evaluation of coordination modes and conformational landscape of the active co-catalyst upon coordination of the respective substrates.<sup>a</sup>

| Species                                                                                          | $\Delta E_{\text{DCM}}$ | qh- $\Delta G_{\text{DCM}}$ |
|--------------------------------------------------------------------------------------------------|-------------------------|-----------------------------|
| [Ni((R)-L <sub>1</sub> )( $\eta^2$ -S <sub>1</sub> )]                                            | 0.0                     | 0.0                         |
| [Ni((R)-L <sub>1</sub> )( $\kappa$ O-S <sub>1</sub> )]                                           | 35.0                    | 35.0                        |
| [Ni((R)-L <sub>1</sub> )( $\kappa$ O'-S <sub>1</sub> )]                                          | 38.3                    | 37.6                        |
| [Ni((R)-L <sub>1</sub> )( $\eta^2$ -S <sub>2</sub> )]                                            | 18.1                    | 18.1                        |
| SS-15-A-[Cu((R,S,S <sub>p</sub> )-L <sub>2</sub> )( $\kappa$ N,O-S <sub>2</sub> )] <sup>+</sup>  | 0.0                     | 0.0                         |
| SS-15-A-[Cu((R,S,S <sub>p</sub> )-L <sub>2</sub> )( $\kappa$ N,O'-S <sub>2</sub> )] <sup>+</sup> | -0.6                    | 1.8                         |
| SS-15-C-[Cu((R,S,S <sub>p</sub> )-L <sub>2</sub> )( $\kappa$ N,O-S <sub>2</sub> )] <sup>+</sup>  | 0.8                     | 1.6                         |
| SS-15-C-[Cu((R,S,S <sub>p</sub> )-L <sub>2</sub> )( $\kappa$ N,O'-S <sub>2</sub> )] <sup>+</sup> | -- <sup>b</sup>         | -- <sup>b</sup>             |
| SS-15-A-[Cu((R,S,S <sub>p</sub> )-L <sub>2</sub> )( $\kappa$ N,O-S <sub>1</sub> )] <sup>+</sup>  | 6.0                     | 6.3                         |

<sup>a</sup> Simulations at B3LYP-D3, BS2, smd=DCM. Energies in kcal·mol<sup>-1</sup>, 298.15 K. <sup>b</sup> hindered by steric clashes with FeCp<sub>2</sub>

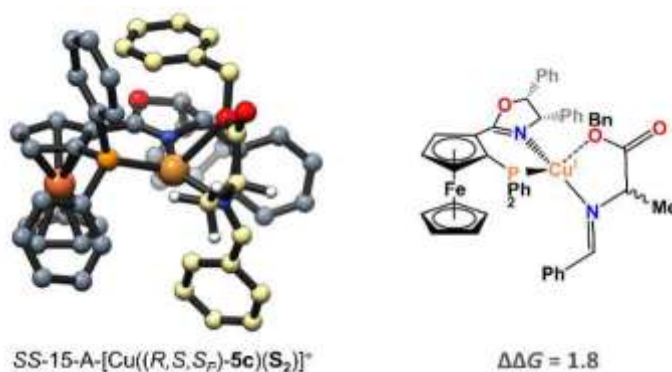

**Fig. S1.** Optimized geometries for activated co-catalysts SS-15-A-[Cu((R,S,S<sub>F</sub>)-L<sub>2</sub>)(κN,O'-S<sub>2</sub>)]<sup>+</sup>. Hydrogen atoms have been omitted for clarity.

### 3. Gibbs Energy Profiles

#### 3.1 Nickel cycle

After TS<sub>I-II</sub>, intermediate II can evolve toward intermediate II', at 3.8 kcal·mol<sup>-1</sup>, in which the η<sup>1</sup>-S<sub>1</sub> propargylic moiety and MeOCO<sub>2</sub><sup>-</sup> coordinate in the equatorial plane. Via TS<sub>II-III'</sub> (4.6 kcal·mol<sup>-1</sup>) decarboxylation yields [Ni<sup>II</sup>(L<sub>1</sub>)(propargyl)(MeO)] at 3.7 kcal·mol<sup>-1</sup> (see Figure S2).

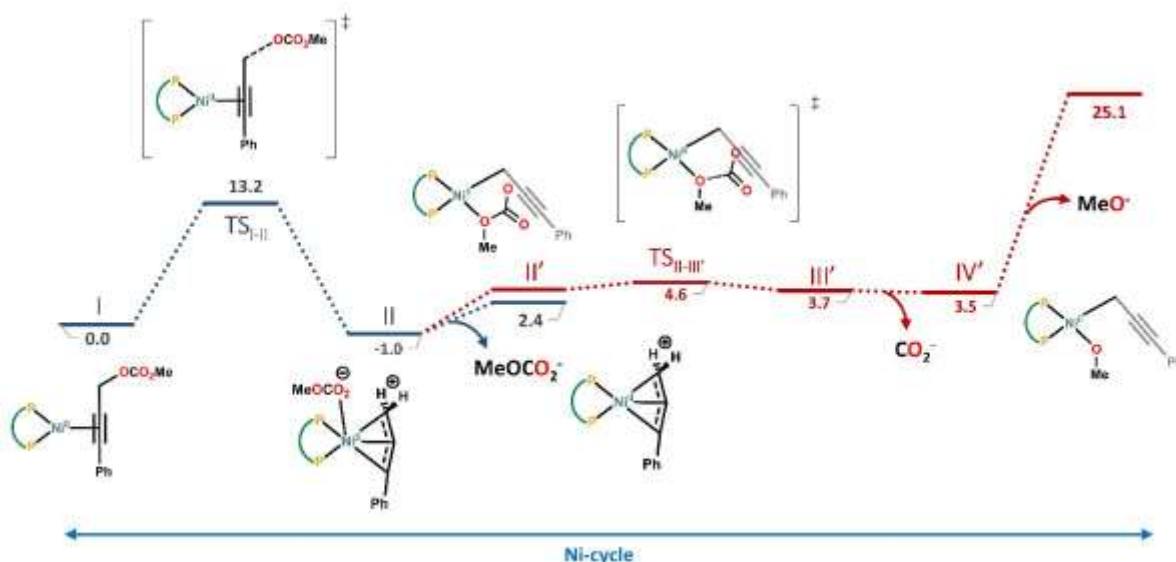

**Fig. S2.** DFT computed mechanism (B3LYP-D3 in CH<sub>2</sub>Cl<sub>2</sub>) of the Ni-based activation cycle of propargylic carbonate S<sub>1</sub>. The numbers are relative Gibbs energies in kcal mol<sup>-1</sup>, taking as zero-energy the separated co-catalyst and substrate S<sub>1</sub>.

### 3.1 Efficiency of the $\text{MeCO}_2^-$ O-groups toward proton abstraction.

We investigated the efficiency of the two possible O-groups of methyl carbonate toward the base-assisted C-H activation. Transition states involving the three groups are depicted in Fig. S4 along with the associated Gibbs energy barriers. As expected the energy follows the basicity order:  $\text{O-CO}_2^- < \text{O-ester}$ . It must be highlighted that the O-ester mediated deprotonation leads to the formation of  $\text{MeOH}$  and  $\text{CO}_2$ .

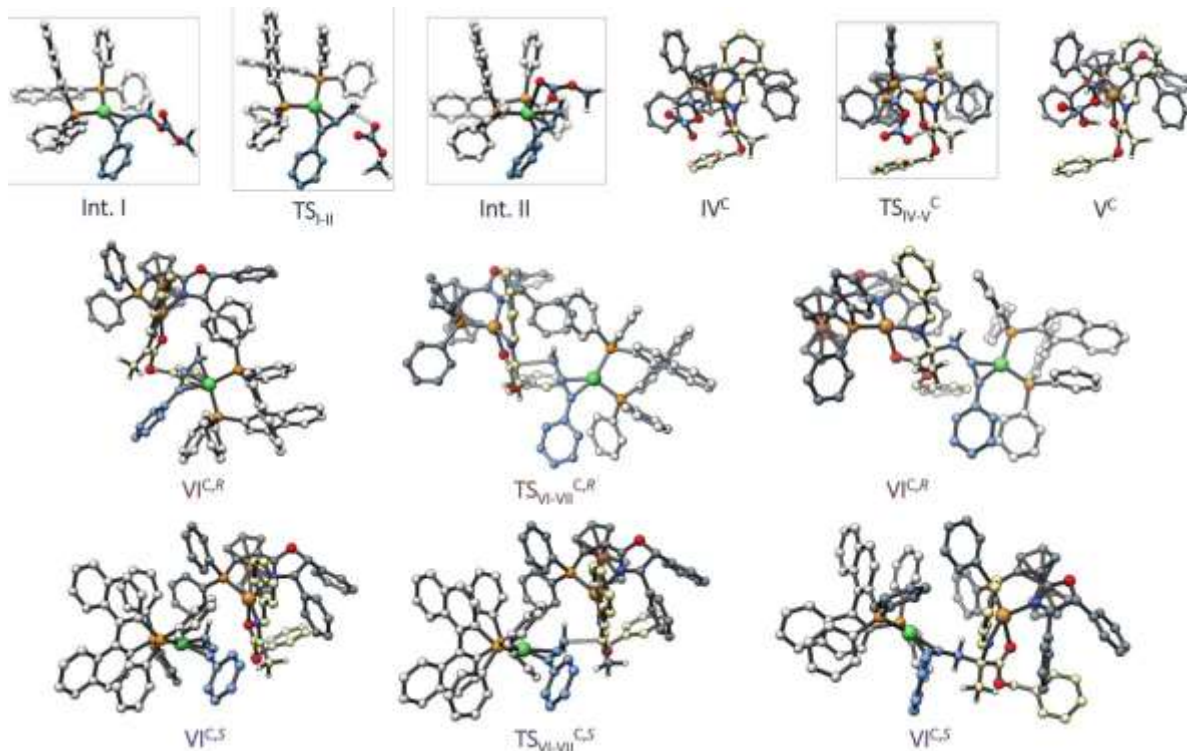

**Fig. S3.** DFT optimized geometry (B3LYP-D3 in  $\text{CH}_2\text{Cl}_2$ ) of the complete intermediates and transition states shown in Fig. 3 of the main text. Hydrogen atoms have been omitted for clarity.

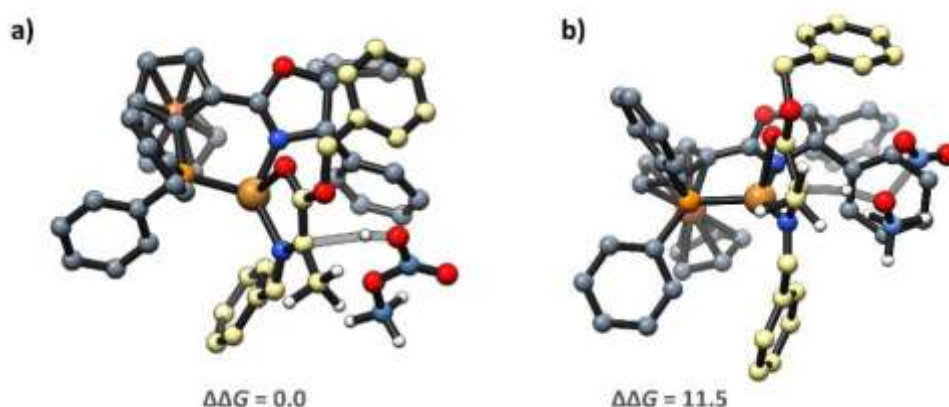

**Fig. S4.** DFT optimized geometry (B3LYP-D3 in  $\text{CH}_2\text{Cl}_2$ ) of the  $\text{MeCO}_2^-$  mediated  $\text{C}(sp^3)$  deprotonation: a)  $\text{O-CO}_2^-$ ; b)  $\text{O-ester}$ . The numbers are relative Gibbs energies in  $\text{kcal mol}^{-1}$ . Hydrogen atoms have been omitted for clarity.

### 3.2 Alternative copper cycle ( $SS-15-A-[Cu((R,S,S\phi)-L_2)(\kappa N,O'-S_2)]^+$ )

#### TS<sub>II-III</sub>

<sup>A</sup>, computed considering the *SS-15-A* isomer of the copper co-catalyst, resulted higher by more than 4 kcal·mol<sup>-1</sup> than the analogous TS<sub>II-III</sub><sup>C</sup> (8.0 kcal·mol<sup>-1</sup>). For sake of completeness, the anticlockwise pathways was computed. The selectivity is reverted giving an ee 81% toward the (*R*) isomer, Fig. S3 and Table S2.

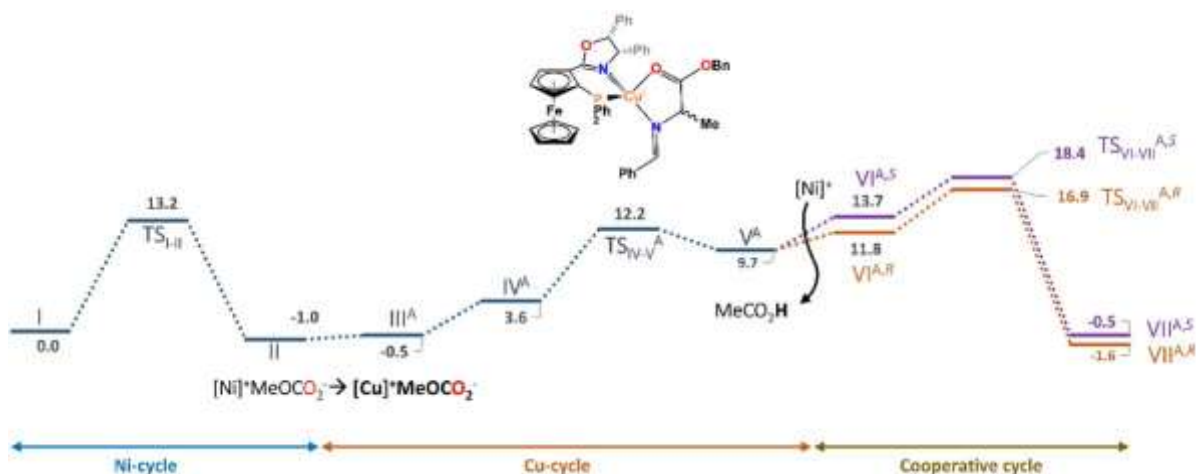

**Fig. S5.** DFT computed mechanism (B3LYP-D3 in CH<sub>2</sub>Cl<sub>2</sub>) for the propargylation of aldimine ester **S**<sub>2</sub> considering the independent activation of the substrates using *SS-15-A*-[Cu((*R,S,S* $\phi$ )-L<sub>2</sub>)( $\kappa N,O'-S_2$ )]<sup>+</sup> isomer. The numbers are relative Gibbs energies in kcal mol<sup>-1</sup>, taking as zero-energy the separated co-catalysts and substrates **S**<sub>1</sub> and **S**<sub>2</sub>.

**Table S2.** DFT (B3LYP-D3 in DCM solvent) energy decomposition in interaction and distortion contributions for the enantiodetermining cooperative C-C coupling TSs. Scheme of the more stable orientations including the main NCIs driving selectivity.

| species                             | $E_{int}$ | $E_{dist}^{Ni}$ | $E_{dist}^{Cu}$ | $E_{dist}^{tot}$ |
|-------------------------------------|-----------|-----------------|-----------------|------------------|
| TS <sub>VI-VII</sub> <sup>C,S</sup> | -30.1     | 4.0             | 15.3            | 16.6             |
| TS <sub>VI-VII</sub> <sup>C,R</sup> | -23.6     | 4.9             | 11.6            | 19.3             |
| $\Delta E^a$                        | -6.5      | -0.9            | 3.7             | 2.7              |
| TS <sub>VI-VII</sub> <sup>A,S</sup> | -23.4     | 5.2             | 11.1            | 16.3             |
| TS <sub>VI-VII</sub> <sup>A,R</sup> | -28.0     | 6.1             | 11.6            | 17.7             |
| $\Delta E^a$                        | 4.6       | -0.9            | -0.5            | -1.4             |

<sup>a</sup>  $\Delta E$  in kcal·mol<sup>-1</sup> computed tacking the pro-(*S*) TS as energy reference.

### 3.3 Supramolecular cycle

The cooperativity of the transformation was assessed computing the energy profile involving both co-catalysts in a supramolecular aggregate from the beginning of the reaction. Our results clearly

show the energetic preference for the independent activation of the substrates by the separated co-catalysts both for  $SS-15-A-[Cu((R,S,S_P)-L_2)(\kappa N,O'-S_2)]^+$  (Fig. S4) and  $SS-15-C-[Cu((R,S,S_P)-L_2)(\kappa N,O'-S_2)]^+$  (Fig. S5) Cu-based catalyst.

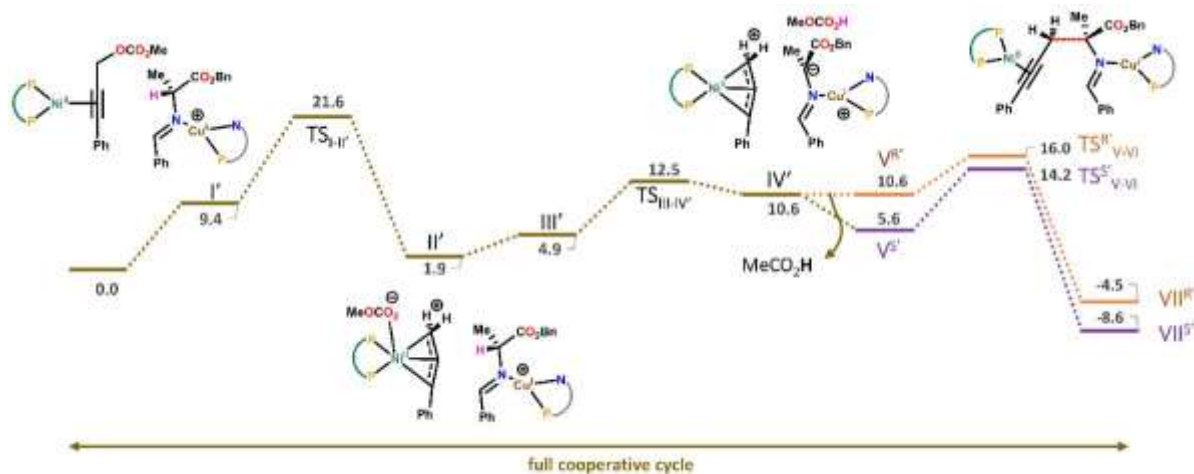

**Fig. S6.** DFT computed mechanism (B3LYP-D3 in  $CH_2Cl_2$ ) for the propargylation of aldimine ester  $S_2$  considering the formation of a supramolecular adduct from the beginning of the reaction. Profile related to the  $SS-15-C-[Cu((R,S,S_P)-L_2)(\kappa N,O'-S_2)]^+$  isomer. The numbers are relative Gibbs energies in  $kcal\ mol^{-1}$ , taking as zero-energy the separated co-catalysts and substrates  $S_1$  and  $S_2$ .

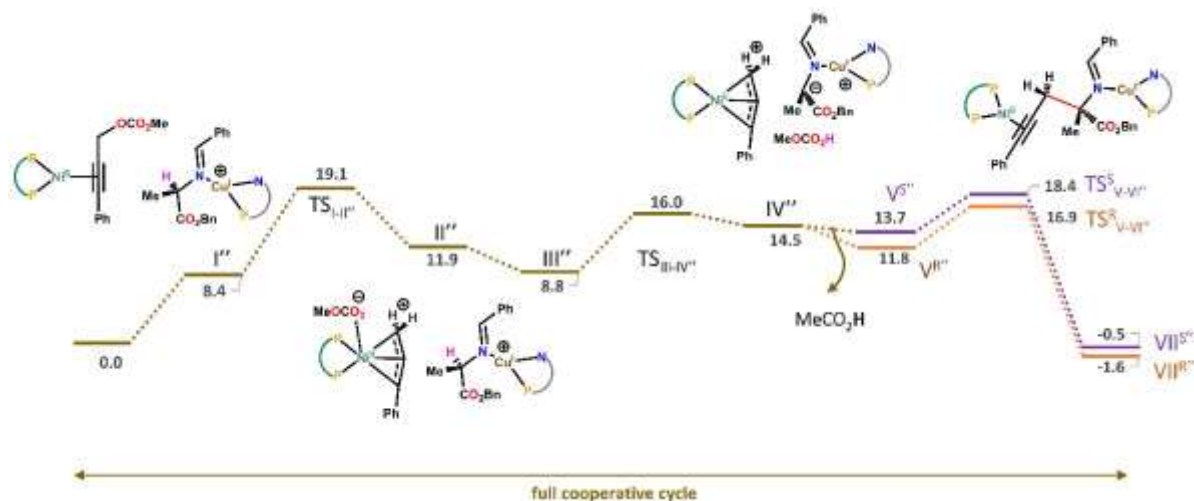

**Fig. S7.** DFT computed mechanism (B3LYP-D3 in  $CH_2Cl_2$ ) for the propargylation of aldimine ester  $S_2$  considering the formation of a supramolecular adduct from the beginning of the reaction. Profile related to the  $SS-15-A-[Cu((R,S,S_P)-L_2)(\kappa N,O'-S_2)]^+$  isomer of the copper co-catalyst. The numbers are relative Gibbs energies in  $kcal\ mol^{-1}$ , taking as zero-energy the separated co-catalysts and substrates  $S_1$  and  $S_2$ .

#### 4. Cartesian coordinates and absolute E and G energies of the optimized structures

##### Int1\_Ni

|                                             |              |
|---------------------------------------------|--------------|
| Charge                                      | 0            |
| Electronic Energy, BS1 (a.u.)               | -3200.754926 |
| Thermal and entropic correction, BS1 (a.u.) | 0.721782     |
| Electronic Energy, BS2 (a.u.)               | -4539.121275 |
| Number of Imaginary Frequencies             | 0            |
| Imaginary frequencies (cm-1)                | None         |

##### Molecular Geometry in Cartesian Coordinates

|    |           |           |           |
|----|-----------|-----------|-----------|
| Ni | 1.127455  | 0.287622  | -0.272967 |
| P  | -0.034361 | -1.532707 | 0.151063  |
| C  | -0.303354 | -2.058060 | -2.563633 |
| H  | 0.485261  | -1.315184 | -2.655187 |
| C  | -1.435904 | -1.151177 | 1.317846  |
| C  | 0.745619  | -4.231465 | 0.782404  |
| H  | 0.008233  | -4.579446 | 0.067850  |
| C  | 0.914778  | -2.860156 | 1.018961  |
| C  | -0.798161 | -2.377092 | -1.289521 |
| C  | -1.296427 | -1.518268 | 2.686575  |
| H  | -0.463024 | -2.140077 | 2.989866  |
| C  | -1.834443 | -3.315699 | -1.170744 |
| H  | -2.243682 | -3.550953 | -0.193211 |
| C  | -3.471642 | 0.082107  | 1.911479  |
| C  | -2.518652 | -0.358318 | 0.927846  |
| C  | 1.539684  | -5.167229 | 1.450901  |
| H  | 1.403695  | -6.226314 | 1.249653  |
| C  | -3.297059 | -0.285773 | 3.285045  |
| C  | -2.192427 | -1.099252 | 3.638749  |
| H  | -2.062566 | -1.391453 | 4.677630  |
| C  | 1.896441  | -2.446559 | 1.936119  |
| H  | 2.058296  | -1.384559 | 2.097061  |
| C  | -1.858947 | -3.611326 | -3.572859 |
| H  | -2.275688 | -4.085776 | -4.456840 |
| C  | -0.831092 | -2.673505 | -3.700465 |
| H  | -0.445677 | -2.415185 | -4.682800 |
| C  | -2.359413 | -3.931245 | -2.307405 |
| H  | -3.169757 | -4.647207 | -2.206478 |
| C  | -4.225936 | 0.170255  | 4.259950  |
| H  | -4.071156 | -0.116200 | 5.297012  |
| C  | -5.478805 | 1.320067  | 2.543799  |
| H  | -6.322343 | 1.944481  | 2.263258  |
| C  | 2.678762  | -3.381159 | 2.612583  |
| H  | 3.438463  | -3.042277 | 3.310842  |
| C  | -5.296679 | 0.956641  | 3.900472  |
| H  | -6.001333 | 1.301184  | 4.651896  |
| C  | -4.592573 | 0.896615  | 1.578208  |
| H  | -4.742678 | 1.196747  | 0.548320  |
| C  | 2.504472  | -4.746276 | 2.368012  |
| H  | 3.124210  | -5.475844 | 2.881753  |
| P  | -0.508106 | 1.756918  | -0.386587 |
| C  | -0.199367 | 2.350937  | 2.310110  |
| H  | 0.728754  | 1.796066  | 2.195950  |
| C  | -2.046149 | 1.035393  | -1.148380 |
| C  | -0.490129 | 4.521060  | -1.201150 |
| H  | -1.058600 | 4.756681  | -0.308238 |

|   |           |           |           |
|---|-----------|-----------|-----------|
| C | -0.115592 | 3.198476  | -1.475014 |
| C | -1.049246 | 2.499014  | 1.203093  |
| C | -2.380978 | 1.387756  | -2.486649 |
| H | -1.831192 | 2.176493  | -2.985334 |
| C | -2.260334 | 3.191774  | 1.353436  |
| H | -2.937181 | 3.289815  | 0.510114  |
| C | -3.831509 | -0.645578 | -1.199694 |
| C | -2.769043 | 0.028453  | -0.503140 |
| C | -0.123372 | 5.553619  | -2.069498 |
| H | -0.413007 | 6.575199  | -1.839333 |
| C | -4.132114 | -0.288426 | -2.554080 |
| C | -3.386236 | 0.747518  | -3.168455 |
| H | -3.621008 | 1.033012  | -4.190648 |
| C | 0.634184  | 2.931838  | -2.634965 |
| H | 0.951891  | 1.912359  | -2.838781 |
| C | -1.757902 | 3.585225  | 3.688113  |
| H | -2.037502 | 4.000648  | 4.652202  |
| C | -0.552580 | 2.892537  | 3.547521  |
| H | 0.108265  | 2.766522  | 4.400509  |
| C | -2.610138 | 3.734840  | 2.590128  |
| H | -3.554757 | 4.259227  | 2.700704  |
| C | -5.163686 | -0.975121 | -3.250958 |
| H | -5.371594 | -0.692226 | -4.279701 |
| C | -5.596166 | -2.329680 | -1.297441 |
| H | -6.163585 | -3.121923 | -0.817337 |
| C | 0.984834  | 3.960151  | -3.509454 |
| H | 1.561326  | 3.735575  | -4.402458 |
| C | -5.883225 | -1.975785 | -2.638481 |
| H | -6.669587 | -2.495461 | -3.178347 |
| C | -4.599929 | -1.684412 | -0.598793 |
| H | -4.387417 | -1.978185 | 0.421977  |
| C | 0.608733  | 5.276922  | -3.225502 |
| H | 0.891169  | 6.081827  | -3.898173 |
| H | 3.053683  | 2.969971  | -1.520265 |
| C | 3.445063  | 2.455026  | -0.640811 |
| H | 3.291674  | 3.098979  | 0.230743  |
| O | 5.295096  | 2.125804  | 1.325534  |
| C | 2.795722  | 1.144820  | -0.455330 |
| C | 2.973554  | -0.135898 | -0.395940 |
| C | 3.902726  | -1.250866 | -0.344735 |
| C | 5.034909  | -1.219135 | 0.494355  |
| C | 5.891525  | -2.317158 | 0.573723  |
| H | 6.755165  | -2.277779 | 1.232895  |
| C | 5.641800  | -3.465925 | -0.183179 |
| H | 6.309522  | -4.320536 | -0.118438 |
| H | 4.308732  | -4.403711 | -1.598899 |
| C | 4.519115  | -3.510592 | -1.016466 |
| C | 3.653530  | -2.420562 | -1.088465 |
| H | 2.763111  | -2.465967 | -1.709213 |
| H | 5.218932  | -0.337738 | 1.099773  |
| C | 5.652505  | 2.137208  | 0.162080  |
| O | 4.880936  | 2.350784  | -0.906620 |
| O | 6.906184  | 1.941773  | -0.267614 |
| C | 7.874128  | 1.692984  | 0.770436  |
| H | 8.831225  | 1.594995  | 0.257529  |
| H | 7.907142  | 2.525037  | 1.478854  |
| H | 7.637886  | 0.768487  | 1.304407  |



|                                             |              |
|---------------------------------------------|--------------|
| Charge                                      | 0            |
| Electronic Energy, BS1 (a.u.)               | -3200.722440 |
| Thermal and entropic correction, BS1 (a.u.) | 0.718048     |
| Electronic Energy, BS2 (a.u.)               | -4539.096449 |
| Number of Imaginary Frequencies             | 1            |
| Imaginary frequencies (cm-1)                | -194.2i      |

#### Molecular Geometry in Cartesian Coordinates

|    |           |           |           |
|----|-----------|-----------|-----------|
| Ni | 1.113835  | 0.278297  | -0.288261 |
| P  | -0.029777 | -1.495952 | 0.270573  |
| C  | -0.309870 | -2.186080 | -2.406062 |
| H  | 0.463757  | -1.437885 | -2.557572 |
| C  | -1.406285 | -0.996840 | 1.415233  |
| C  | 0.772970  | -4.114159 | 1.111691  |
| H  | 0.035554  | -4.521967 | 0.429914  |
| C  | 0.940265  | -2.728314 | 1.236049  |
| C  | -0.787170 | -2.429227 | -1.108834 |
| C  | -1.230750 | -1.220425 | 2.810616  |
| H  | -0.380735 | -1.793572 | 3.159017  |
| C  | -1.804227 | -3.376062 | -0.912105 |
| H  | -2.200096 | -3.549902 | 0.083492  |
| C  | -3.453037 | 0.254459  | 1.920738  |
| C  | -2.510434 | -0.267097 | 0.968230  |
| C  | 1.575220  | -4.987987 | 1.849792  |
| H  | 1.443531  | -6.060363 | 1.736180  |
| C  | -3.245594 | 0.029991  | 3.320269  |
| C  | -2.118425 | -0.722928 | 3.732132  |
| H  | -1.963425 | -0.905315 | 4.792264  |
| C  | 1.922748  | -2.234270 | 2.110645  |
| H  | 2.080356  | -1.162221 | 2.187956  |
| C  | -1.841978 | -3.836652 | -3.287721 |
| H  | -2.255957 | -4.379808 | -4.132417 |
| C  | -0.835624 | -2.889066 | -3.491483 |
| H  | -0.464739 | -2.691846 | -4.493117 |
| C  | -2.325283 | -4.078685 | -1.998515 |
| H  | -3.119540 | -4.802005 | -1.840535 |
| C  | -4.164608 | 0.566471  | 4.262792  |
| H  | -3.985970 | 0.388699  | 5.320013  |
| C  | -5.468758 | 1.517644  | 2.464193  |
| H  | -6.328385 | 2.097066  | 2.139780  |
| C  | 2.713654  | -3.107698 | 2.855053  |
| H  | 3.474113  | -2.709950 | 3.520531  |
| C  | -5.255402 | 1.295162  | 3.846564  |
| H  | -5.952759 | 1.701916  | 4.573212  |
| C  | -4.593115 | 1.013714  | 1.528322  |
| H  | -4.767859 | 1.205594  | 0.476704  |
| C  | 2.544195  | -4.488748 | 2.722116  |
| H  | 3.170809  | -5.171225 | 3.289222  |
| P  | -0.552261 | 1.736870  | -0.525878 |
| C  | -0.197972 | 2.600807  | 2.083888  |
| H  | 0.738163  | 2.052784  | 2.009132  |
| C  | -2.067946 | 0.927478  | -1.224364 |
| C  | -0.564685 | 4.363844  | -1.675302 |
| H  | -1.191932 | 4.684188  | -0.850576 |
| C  | -0.129105 | 3.034726  | -1.761944 |
| C  | -1.072712 | 2.624737  | 0.986093  |
| C  | -2.403862 | 1.158795  | -2.587919 |

|   |           |           |           |
|---|-----------|-----------|-----------|
| H | -1.858092 | 1.902014  | -3.156201 |
| C | -2.292097 | 3.311808  | 1.086937  |
| H | -2.986550 | 3.313171  | 0.252596  |
| C | -3.840439 | -0.760246 | -1.115235 |
| C | -2.781124 | -0.019683 | -0.487904 |
| C | -0.181228 | 5.292616  | -2.646707 |
| H | -0.518340 | 6.322239  | -2.566004 |
| C | -4.146165 | -0.526862 | -2.495358 |
| C | -3.408304 | 0.453545  | -3.204114 |
| H | -3.647554 | 0.642863  | -4.247275 |
| C | 0.697005  | 2.651738  | -2.833958 |
| H | 1.057561  | 1.627177  | -2.891588 |
| C | -1.750211 | 3.948071  | 3.358442  |
| H | -2.017516 | 4.456774  | 4.280332  |
| C | -0.536639 | 3.261533  | 3.265849  |
| H | 0.142045  | 3.233638  | 4.113471  |
| C | -2.625789 | 3.973566  | 2.268882  |
| H | -3.575682 | 4.494289  | 2.344765  |
| C | -5.173507 | -1.281775 | -3.124406 |
| H | -5.386775 | -1.094506 | -4.173536 |
| C | -5.588641 | -2.460839 | -1.055461 |
| H | -6.148107 | -3.212177 | -0.505516 |
| C | 1.069659  | 3.578291  | -3.807239 |
| H | 1.710266  | 3.270063  | -4.628515 |
| C | -5.881744 | -2.230005 | -2.421912 |
| H | -6.664447 | -2.802901 | -2.910712 |
| C | -4.597015 | -1.747031 | -0.419946 |
| H | -4.379907 | -1.945523 | 0.622718  |
| C | 0.631362  | 4.902951  | -3.713491 |
| H | 0.929404  | 5.628891  | -4.464593 |
| H | 2.670770  | 2.931447  | -1.056251 |
| C | 2.960593  | 2.297874  | -0.227820 |
| H | 2.959380  | 2.731453  | 0.764351  |
| O | 5.467897  | 1.747806  | 1.310654  |
| C | 3.027814  | 0.952012  | -0.371104 |
| C | 2.928431  | -0.330441 | -0.424796 |
| C | 3.803087  | -1.494302 | -0.455271 |
| C | 5.083851  | -1.423114 | 0.128541  |
| C | 5.910022  | -2.545760 | 0.138260  |
| H | 6.894431  | -2.484485 | 0.595026  |
| C | 5.476902  | -3.748438 | -0.431176 |
| H | 6.122416  | -4.622451 | -0.417131 |
| H | 3.864094  | -4.755830 | -1.453165 |
| C | 4.208588  | -3.823370 | -1.014523 |
| C | 3.375316  | -2.705338 | -1.023740 |
| H | 2.383271  | -2.763652 | -1.460033 |
| H | 5.403746  | -0.486176 | 0.579106  |
| C | 5.747270  | 2.413624  | 0.297556  |
| O | 4.988153  | 3.100609  | -0.451935 |
| O | 7.071658  | 2.451481  | -0.140950 |
| C | 8.000376  | 1.716118  | 0.651298  |
| H | 8.987048  | 1.899454  | 0.215563  |
| H | 7.995938  | 2.044238  | 1.696636  |
| H | 7.791748  | 0.639748  | 0.630872  |

Int2\_Ni

Charge

0

Electronic Energy, BS1 (a.u.)

-3200.752941

|                                             |              |
|---------------------------------------------|--------------|
| Thermal and entropic correction, BS1 (a.u.) | 0.718399     |
| Electronic Energy, BS2 (a.u.)               | -4539.119297 |
| Number of Imaginary Frequencies             | 0            |
| Imaginary frequencies (cm-1)                | None         |

**Molecular Geometry in Cartesian Coordinates**

|    |           |           |           |
|----|-----------|-----------|-----------|
| Ni | 1.064231  | -0.882892 | 0.764028  |
| P  | 0.844549  | 1.019383  | -0.356453 |
| C  | 0.524782  | 2.411808  | 2.024560  |
| H  | 0.987484  | 1.531155  | 2.461704  |
| C  | -0.410798 | 0.656047  | -1.673308 |
| C  | 2.581295  | 3.058726  | -1.350824 |
| H  | 1.912249  | 3.788061  | -0.910963 |
| C  | 2.314271  | 1.684138  | -1.253471 |
| C  | 0.273022  | 2.442150  | 0.645044  |
| C  | 0.085309  | 0.299803  | -2.958683 |
| H  | 1.138364  | 0.415213  | -3.175969 |
| C  | -0.339648 | 3.571871  | 0.081897  |
| H  | -0.555123 | 3.598824  | -0.981185 |
| C  | -2.648725 | -0.036021 | -2.395170 |
| C  | -1.770730 | 0.508995  | -1.394790 |
| C  | 3.733380  | 3.508143  | -1.999203 |
| H  | 3.930106  | 4.574907  | -2.060863 |
| C  | -2.122674 | -0.401838 | -3.676003 |
| C  | -0.742725 | -0.203163 | -3.929742 |
| H  | -0.341316 | -0.467427 | -4.904467 |
| C  | 3.222155  | 0.769617  | -1.812142 |
| H  | 3.026121  | -0.293400 | -1.727733 |
| C  | -0.432892 | 4.619917  | 2.261408  |
| H  | -0.711309 | 5.462998  | 2.887284  |
| C  | 0.175120  | 3.497797  | 2.829547  |
| H  | 0.371573  | 3.463383  | 3.897341  |
| C  | -0.691357 | 4.654567  | 0.887926  |
| H  | -1.177940 | 5.518205  | 0.444724  |
| C  | -2.989504 | -0.949189 | -4.660681 |
| H  | -2.570825 | -1.222085 | -5.625848 |
| C  | -4.853587 | -0.777168 | -3.131881 |
| H  | -5.908295 | -0.933579 | -2.924238 |
| C  | 4.368959  | 1.225854  | -2.461479 |
| H  | 5.065346  | 0.503710  | -2.877835 |
| C  | -4.327775 | -1.133752 | -4.397530 |
| H  | -4.982312 | -1.555400 | -5.154990 |
| C  | -4.038607 | -0.241828 | -2.159369 |
| H  | -4.456177 | 0.013731  | -1.193065 |
| C  | 4.631557  | 2.594387  | -2.554219 |
| H  | 5.532430  | 2.946668  | -3.049045 |
| P  | -1.094244 | -1.229476 | 1.161081  |
| C  | -1.175131 | -3.318651 | -0.692539 |
| H  | -0.097823 | -3.198405 | -0.742523 |
| C  | -2.212659 | 0.249666  | 1.088393  |
| C  | -2.116998 | -2.853604 | 3.289004  |
| H  | -2.692244 | -3.395913 | 2.546851  |
| C  | -1.292853 | -1.788176 | 2.907823  |
| C  | -1.942919 | -2.477623 | 0.125839  |
| C  | -2.861892 | 0.699495  | 2.273083  |
| H  | -2.752055 | 0.139618  | 3.192548  |
| C  | -3.342858 | -2.598857 | 0.137205  |
| H  | -3.943241 | -1.937772 | 0.755090  |

|   |           |           |           |
|---|-----------|-----------|-----------|
| C | -3.173637 | 2.155193  | -0.111857 |
| C | -2.380700 | 0.956453  | -0.100261 |
| C | -2.198108 | -3.232963 | 4.632852  |
| H | -2.836472 | -4.065128 | 4.915820  |
| C | -3.796783 | 2.602984  | 1.097086  |
| C | -3.631943 | 1.835652  | 2.276513  |
| H | -4.117910 | 2.162914  | 3.191842  |
| C | -0.546365 | -1.112807 | 3.890582  |
| H | 0.112524  | -0.299950 | 3.597390  |
| C | -3.199846 | -4.400911 | -1.470179 |
| H | -3.688763 | -5.143123 | -2.095203 |
| C | -1.809335 | -4.276579 | -1.487551 |
| H | -1.209416 | -4.918443 | -2.126727 |
| C | -3.966407 | -3.561590 | -0.655338 |
| H | -5.049229 | -3.647349 | -0.647466 |
| C | -4.548281 | 3.809275  | 1.096097  |
| H | -5.012125 | 4.132509  | 2.024338  |
| C | -4.061350 | 4.121701  | -1.250975 |
| H | -4.161688 | 4.717140  | -2.153853 |
| C | -0.637375 | -1.486122 | 5.229967  |
| H | -0.057385 | -0.954377 | 5.978886  |
| C | -4.678269 | 4.556837  | -0.052280 |
| H | -5.249983 | 5.480319  | -0.043615 |
| C | -3.333559 | 2.952566  | -1.281658 |
| H | -2.861470 | 2.641127  | -2.205704 |
| C | -1.464785 | -2.550465 | 5.604241  |
| H | -1.530500 | -2.848543 | 6.646696  |
| H | 1.495110  | -3.524231 | 0.982744  |
| C | 1.518650  | -2.708305 | 1.705303  |
| H | 1.017186  | -2.880687 | 2.652487  |
| O | 2.242699  | -4.064090 | -1.053825 |
| C | 2.592471  | -1.845637 | 1.662147  |
| C | 3.106878  | -0.756498 | 1.292190  |
| C | 4.283121  | 0.052349  | 1.091546  |
| C | 5.454875  | -0.550756 | 0.594398  |
| C | 6.593029  | 0.217775  | 0.361747  |
| H | 7.490959  | -0.255187 | -0.026026 |
| C | 6.576600  | 1.593272  | 0.612711  |
| H | 7.461642  | 2.192676  | 0.419277  |
| H | 5.394939  | 3.267211  | 1.290364  |
| C | 5.415482  | 2.197402  | 1.104198  |
| C | 4.274244  | 1.434817  | 1.342439  |
| H | 3.364103  | 1.905076  | 1.700296  |
| H | 5.450333  | -1.613638 | 0.377895  |
| C | 2.427671  | -2.878015 | -1.385118 |
| O | 1.610448  | -1.914591 | -1.400898 |
| O | 3.711619  | -2.497482 | -1.801029 |
| C | 4.705982  | -3.516010 | -1.762551 |
| H | 5.635601  | -3.051433 | -2.104364 |
| H | 4.845787  | -3.908776 | -0.748663 |
| H | 4.453895  | -4.355316 | -2.421080 |

**Int2i\_Ni**

|                                             |              |
|---------------------------------------------|--------------|
| Charge                                      | 0            |
| Electronic Energy, BS1 (a.u.)               | -3200.744667 |
| Thermal and entropic correction, BS1 (a.u.) | 0.722426     |
| Electronic Energy, BS2 (a.u.)               | -4539.114118 |

Number of Imaginary Frequencies

1

Imaginary frequencies (cm-1)

-2.6i

**Molecular Geometry in Cartesian Coordinates**

|    |           |           |           |
|----|-----------|-----------|-----------|
| Ni | 1.031504  | 0.417856  | -1.024046 |
| P  | -0.254202 | 1.661577  | 0.420166  |
| C  | 0.999204  | 0.412566  | 2.552833  |
| H  | 1.692943  | 0.071003  | 1.787808  |
| C  | -2.019995 | 1.448793  | -0.107635 |
| C  | 0.434907  | 4.169269  | 1.580723  |
| H  | 0.429060  | 3.670084  | 2.542207  |
| C  | 0.098697  | 3.471357  | 0.410030  |
| C  | -0.107122 | 1.190145  | 2.180819  |
| C  | -2.620697 | 2.447168  | -0.925606 |
| H  | -2.133592 | 3.403709  | -1.055980 |
| C  | -1.015053 | 1.618462  | 3.161300  |
| H  | -1.878335 | 2.212897  | 2.879340  |
| C  | -3.944104 | -0.004820 | -0.557756 |
| C  | -2.686972 | 0.239637  | 0.095858  |
| C  | 0.791509  | 5.519180  | 1.522804  |
| H  | 1.048705  | 6.042526  | 2.439431  |
| C  | -4.508520 | 1.000503  | -1.406933 |
| C  | -3.822577 | 2.231472  | -1.552967 |
| H  | -4.260949 | 3.011074  | -2.170245 |
| C  | 0.143969  | 4.153562  | -0.819681 |
| H  | -0.074420 | 3.625862  | -1.740290 |
| C  | 0.288431  | 0.494118  | 4.862391  |
| H  | 0.437386  | 0.220068  | 5.902915  |
| C  | 1.196734  | 0.066292  | 3.890795  |
| H  | 2.052555  | -0.541178 | 4.170742  |
| C  | -0.817108 | 1.268658  | 4.496699  |
| H  | -1.530555 | 1.591297  | 5.248995  |
| C  | -5.741425 | 0.751404  | -2.068674 |
| H  | -6.150552 | 1.525566  | -2.712408 |
| C  | -5.853198 | -1.439532 | -1.054128 |
| H  | -6.375612 | -2.383212 | -0.925977 |
| C  | 0.495236  | 5.501302  | -0.872584 |
| H  | 0.530802  | 6.004894  | -1.834039 |
| C  | -6.402869 | -0.443425 | -1.897387 |
| H  | -7.344491 | -0.626496 | -2.406918 |
| C  | -4.658595 | -1.227249 | -0.402475 |
| H  | -4.247282 | -2.006529 | 0.227601  |
| C  | 0.821452  | 6.189613  | 0.299300  |
| H  | 1.104284  | 7.237573  | 0.256732  |
| P  | -0.098591 | -1.452952 | -0.752865 |
| C  | -1.218941 | -0.756699 | -3.220063 |
| H  | -0.498880 | 0.058388  | -3.221707 |
| C  | -1.139527 | -1.665054 | 0.772001  |
| C  | 0.809348  | -4.048713 | -1.538342 |
| H  | -0.003554 | -4.073565 | -2.255433 |
| C  | 0.990584  | -2.934602 | -0.708505 |
| C  | -1.261473 | -1.665056 | -2.149869 |
| C  | -0.796027 | -2.680123 | 1.710663  |
| H  | -0.004601 | -3.380415 | 1.482363  |
| C  | -2.217384 | -2.693683 | -2.145461 |
| H  | -2.270240 | -3.384561 | -1.309230 |
| C  | -2.875264 | -0.893948 | 2.320696  |
| C  | -2.193839 | -0.799338 | 1.057731  |
| C  | 1.683454  | -5.135852 | -1.453269 |

|   |           |           |           |
|---|-----------|-----------|-----------|
| H | 1.537075  | -5.992116 | -2.105369 |
| C | -2.485526 | -1.898305 | 3.263246  |
| C | -1.449902 | -2.797608 | 2.911215  |
| H | -1.167586 | -3.579895 | 3.610621  |
| C | 2.065850  | -2.918766 | 0.196772  |
| H | 2.225533  | -2.053316 | 0.832237  |
| C | -3.070766 | -1.912751 | -4.269668 |
| H | -3.778759 | -2.004428 | -5.088452 |
| C | -2.125758 | -0.884231 | -4.274274 |
| H | -2.096423 | -0.172599 | -5.094346 |
| C | -3.113393 | -2.819314 | -3.206489 |
| H | -3.854958 | -3.612625 | -3.194152 |
| C | -3.128474 | -1.964581 | 4.528710  |
| H | -2.815700 | -2.733503 | 5.230097  |
| C | -4.508110 | -0.070817 | 3.935743  |
| H | -5.285966 | 0.637878  | 4.204793  |
| C | 2.923543  | -4.013921 | 0.292597  |
| H | 3.744752  | -3.991251 | 1.002438  |
| C | -4.118647 | -1.068625 | 4.862321  |
| H | -4.601484 | -1.121571 | 5.833773  |
| C | -3.907714 | 0.012063  | 2.698684  |
| H | -4.213277 | 0.789722  | 2.009436  |
| C | 2.736032  | -5.123927 | -0.535961 |
| H | 3.410609  | -5.972749 | -0.469687 |
| H | 2.216108  | 0.123867  | -3.165094 |
| C | 2.194551  | -0.563961 | -2.316800 |
| H | 1.861929  | -1.545447 | -2.662590 |
| O | 2.649801  | 3.443170  | -3.233917 |
| C | 3.432797  | -0.643721 | -1.603702 |
| C | 4.439873  | -0.696373 | -0.914687 |
| C | 5.594148  | -0.786747 | -0.085340 |
| C | 6.204877  | 0.374371  | 0.437339  |
| C | 7.321823  | 0.273525  | 1.264439  |
| H | 7.780068  | 1.176656  | 1.658306  |
| C | 7.853128  | -0.979172 | 1.588299  |
| H | 8.723884  | -1.052724 | 2.233503  |
| H | 7.668397  | -3.112595 | 1.317233  |
| C | 7.258707  | -2.136009 | 1.073672  |
| C | 6.142969  | -2.046111 | 0.243841  |
| H | 5.683101  | -2.942742 | -0.159535 |
| H | 5.792404  | 1.347147  | 0.187692  |
| C | 1.825275  | 2.607061  | -2.874789 |
| O | 0.795507  | 2.114149  | -3.364567 |
| O | 2.073030  | 2.038190  | -1.523939 |
| C | 3.164548  | 2.576766  | -0.770034 |
| H | 3.134955  | 2.096948  | 0.209850  |
| H | 4.115030  | 2.360179  | -1.262218 |
| H | 3.044764  | 3.657212  | -0.661941 |

### TS23i\_Ni

|                                             |              |
|---------------------------------------------|--------------|
| Charge                                      | 0            |
| Electronic Energy, BS1 (a.u.)               | -3200.737561 |
| Thermal and entropic correction, BS1 (a.u.) | 0.717382     |
| Electronic Energy, BS2 (a.u.)               | -4539.109017 |
| Number of Imaginary Frequencies             | 1            |
| Imaginary frequencies (cm-1)                | -37.9i       |

## Molecular Geometry in Cartesian Coordinates

|    |           |           |           |
|----|-----------|-----------|-----------|
| Ni | 1.108100  | 0.396734  | -0.675725 |
| P  | -0.504895 | 1.714003  | 0.301666  |
| C  | 0.165711  | 0.934211  | 2.877866  |
| H  | 1.040473  | 0.509170  | 2.393122  |
| C  | -2.098568 | 1.301483  | -0.557462 |
| C  | -0.407800 | 4.503158  | 0.948629  |
| H  | -0.774018 | 4.254384  | 1.938054  |
| C  | -0.220093 | 3.502583  | -0.015345 |
| C  | -0.804680 | 1.585280  | 2.102067  |
| C  | -2.520138 | 2.121570  | -1.642336 |
| H  | -2.010826 | 3.056876  | -1.837968 |
| C  | -1.941909 | 2.122445  | 2.725347  |
| H  | -2.708136 | 2.608923  | 2.129891  |
| C  | -3.876301 | -0.288618 | -1.129902 |
| C  | -2.774755 | 0.108042  | -0.296108 |
| C  | -0.110539 | 5.835646  | 0.648117  |
| H  | -0.258519 | 6.600534  | 1.405313  |
| C  | -4.269476 | 0.544187  | -2.227090 |
| C  | -3.568457 | 1.755509  | -2.450168 |
| H  | -3.874145 | 2.398898  | -3.271030 |
| C  | 0.283990  | 3.858371  | -1.278944 |
| H  | 0.468961  | 3.088263  | -2.016521 |
| C  | -1.130475 | 1.362016  | 4.874228  |
| H  | -1.261634 | 1.269924  | 5.948615  |
| C  | 0.002165  | 0.822220  | 4.259631  |
| H  | 0.754069  | 0.309284  | 4.852394  |
| C  | -2.100973 | 2.012700  | 4.106596  |
| H  | -2.988772 | 2.420305  | 4.580603  |
| C  | -5.349232 | 0.145138  | -3.060861 |
| H  | -5.629612 | 0.788783  | -3.890532 |
| C  | -5.643491 | -1.856433 | -1.738334 |
| H  | -6.175642 | -2.786023 | -1.557716 |
| C  | 0.570240  | 5.189277  | -1.578886 |
| H  | 0.959971  | 5.445592  | -2.560155 |
| C  | -6.025359 | -1.029967 | -2.823034 |
| H  | -6.849853 | -1.327343 | -3.464547 |
| C  | -4.598537 | -1.497678 | -0.915926 |
| H  | -4.312774 | -2.148519 | -0.098397 |
| C  | 0.376827  | 6.181892  | -0.613520 |
| H  | 0.610318  | 7.218074  | -0.842119 |
| P  | -0.036843 | -1.488849 | -0.475824 |
| C  | -0.775774 | -1.213693 | -3.152794 |
| H  | -0.104304 | -0.360415 | -3.142228 |
| C  | -1.296799 | -1.582592 | 0.884781  |
| C  | 1.094608  | -4.119622 | -0.668610 |
| H  | 0.356225  | -4.349401 | -1.428786 |
| C  | 1.125988  | -2.854660 | -0.067494 |
| C  | -0.945956 | -1.977253 | -1.987741 |
| C  | -1.046014 | -2.418162 | 2.009503  |
| H  | -0.182407 | -3.070407 | 2.012930  |
| C  | -1.836986 | -3.061759 | -1.995951 |
| H  | -1.998890 | -3.640339 | -1.091475 |
| C  | -3.306391 | -0.745553 | 2.009023  |
| C  | -2.426298 | -0.764355 | 0.873751  |
| C  | 2.025845  | -5.094026 | -0.298873 |
| H  | 1.997643  | -6.069807 | -0.775410 |
| C  | -3.015123 | -1.569691 | 3.143462  |
| C  | -1.877137 | -2.412269 | 3.102353  |

|   |           |           |           |
|---|-----------|-----------|-----------|
| H | -1.663381 | -3.053148 | 3.953653  |
| C | 2.109135  | -2.576197 | 0.897585  |
| H | 2.158264  | -1.586680 | 1.343133  |
| C | -2.358497 | -2.624260 | -4.317982 |
| H | -2.911876 | -2.872016 | -5.219256 |
| C | -1.480864 | -1.537227 | -4.312865 |
| H | -1.350248 | -0.935639 | -5.207691 |
| C | -2.534115 | -3.386434 | -3.159711 |
| H | -3.226782 | -4.222872 | -3.156686 |
| C | -3.860368 | -1.518154 | 4.284968  |
| H | -3.619308 | -2.147050 | 5.137903  |
| C | -5.252319 | 0.128540  | 3.192086  |
| H | -6.116261 | 0.786363  | 3.219351  |
| C | 3.025916  | -3.555772 | 1.276956  |
| H | 3.781785  | -3.326207 | 2.021796  |
| C | -4.956427 | -0.686085 | 4.312362  |
| H | -5.595305 | -0.650263 | 5.190042  |
| C | -4.451598 | 0.099325  | 2.071813  |
| H | -4.687443 | 0.738894  | 1.229899  |
| C | 2.986515  | -4.817628 | 0.676490  |
| H | 3.706905  | -5.578846 | 0.962226  |
| H | 2.392977  | 0.143142  | -2.745068 |
| C | 2.374639  | -0.569475 | -1.915142 |
| H | 2.032955  | -1.543044 | -2.281033 |
| O | 4.157434  | 3.312585  | -2.048978 |
| C | 3.645807  | -0.677272 | -1.267583 |
| C | 4.702367  | -0.768035 | -0.662411 |
| C | 5.917938  | -0.846754 | 0.073399  |
| C | 6.656609  | 0.321750  | 0.366623  |
| C | 7.839877  | 0.245560  | 1.098378  |
| H | 8.395115  | 1.154419  | 1.314873  |
| C | 8.313438  | -0.989224 | 1.555238  |
| H | 9.236017  | -1.043801 | 2.126152  |
| H | 7.952976  | -3.116306 | 1.620218  |
| C | 7.591338  | -2.152862 | 1.270467  |
| C | 6.408078  | -2.088180 | 0.536821  |
| H | 5.848006  | -2.991626 | 0.315732  |
| H | 6.286485  | 1.279954  | 0.013740  |
| C | 3.222683  | 2.812935  | -2.563801 |
| O | 2.426610  | 2.474469  | -3.367822 |
| O | 2.306213  | 1.869172  | -0.775722 |
| C | 2.918784  | 2.160105  | 0.446849  |
| H | 2.205058  | 2.550003  | 1.197578  |
| H | 3.422703  | 1.284787  | 0.893226  |
| H | 3.688156  | 2.933180  | 0.299916  |

### Int3i\_Ni

|                                             |              |
|---------------------------------------------|--------------|
| Charge                                      | 0            |
| Electronic Energy, BS1 (a.u.)               | -3012.144083 |
| Thermal and entropic correction, BS1 (a.u.) | 0.710105     |
| Electronic Energy, BS2 (a.u.)               | -4350.428289 |
| Number of Imaginary Frequencies             | 1            |
| Imaginary frequencies (cm-1)                | -3.0i        |

### Molecular Geometry in Cartesian Coordinates

|    |           |          |           |
|----|-----------|----------|-----------|
| Ni | 1.142407  | 0.436115 | -1.112560 |
| P  | -0.554002 | 1.807127 | -0.394992 |



|   |           |           |           |
|---|-----------|-----------|-----------|
| C | 0.450223  | 1.956479  | 2.183293  |
| H | 1.335263  | 1.515396  | 1.732200  |
| C | -2.141612 | 0.977704  | -0.889885 |
| C | -0.878644 | 4.642713  | -0.623759 |
| H | -1.136790 | 4.662465  | 0.428768  |
| C | -0.569944 | 3.431227  | -1.259159 |
| C | -0.676955 | 2.207885  | 1.386770  |
| C | -2.755869 | 1.365287  | -2.114895 |
| H | -2.393351 | 2.237553  | -2.644256 |
| C | -1.825212 | 2.764600  | 1.971197  |
| H | -2.709832 | 2.940993  | 1.367492  |
| C | -3.729062 | -0.887079 | -0.741940 |
| C | -2.627800 | -0.136494 | -0.202664 |
| C | -0.845091 | 5.843445  | -1.337708 |
| H | -1.084191 | 6.774322  | -0.831094 |
| C | -4.319672 | -0.485759 | -1.983544 |
| C | -3.807989 | 0.659057  | -2.643717 |
| H | -4.262497 | 0.977185  | -3.578268 |
| C | -0.208635 | 3.446351  | -2.618854 |
| H | 0.071278  | 2.520084  | -3.105292 |
| C | -0.713999 | 2.818451  | 4.119963  |
| H | -0.732045 | 3.049700  | 5.181196  |
| C | 0.431028  | 2.260627  | 3.545611  |
| H | 1.305348  | 2.055728  | 4.156739  |
| C | -1.840927 | 3.070259  | 3.331928  |
| H | -2.737099 | 3.489456  | 3.779336  |
| C | -5.399545 | -1.235750 | -2.523549 |
| H | -5.831731 | -0.916276 | -3.468250 |
| C | -5.307694 | -2.744254 | -0.637469 |
| H | -5.690103 | -3.622406 | -0.125082 |
| C | -0.190573 | 4.645175  | -3.331691 |
| H | 0.083993  | 4.641052  | -4.382800 |
| C | -5.887038 | -2.342022 | -1.865437 |
| H | -6.712635 | -2.909618 | -2.284959 |
| C | -4.258042 | -2.038953 | -0.091827 |
| H | -3.819192 | -2.370048 | 0.841572  |
| C | -0.505793 | 5.847275  | -2.692011 |
| H | -0.481067 | 6.781909  | -3.245505 |
| P | 0.274760  | -1.413480 | -0.230310 |
| C | -0.717647 | -2.040950 | -2.760793 |
| H | -0.169052 | -1.158401 | -3.076170 |
| C | -0.844927 | -1.218473 | 1.239808  |
| C | 1.737522  | -3.850264 | 0.165725  |
| H | 0.994658  | -4.358895 | -0.438612 |
| C | 1.632300  | -2.475380 | 0.413078  |
| C | -0.685423 | -2.429974 | -1.413046 |
| C | -0.395008 | -1.640066 | 2.522662  |
| H | 0.544248  | -2.169220 | 2.615794  |
| C | -1.416784 | -3.554992 | -1.001187 |
| H | -1.419996 | -3.848747 | 0.044189  |
| C | -2.850525 | -0.289608 | 2.298596  |
| C | -2.070618 | -0.563010 | 1.123329  |
| C | 2.809413  | -4.577430 | 0.691103  |
| H | 2.884577  | -5.642051 | 0.488402  |
| C | -2.359303 | -0.690950 | 3.582420  |
| C | -1.126134 | -1.383936 | 3.656083  |
| H | -0.759732 | -1.708517 | 4.626359  |
| C | 2.624252  | -1.838181 | 1.178809  |
| H | 2.568426  | -0.766160 | 1.346006  |

|   |           |           |           |
|---|-----------|-----------|-----------|
| C | -2.183008 | -3.896647 | -3.271054 |
| H | -2.769538 | -4.462184 | -3.989423 |
| C | -1.464864 | -2.772163 | -3.685275 |
| H | -1.491805 | -2.458742 | -4.724855 |
| C | -2.156595 | -4.287805 | -1.929456 |
| H | -2.725393 | -5.153187 | -1.602324 |
| C | -3.107366 | -0.379584 | 4.750158  |
| H | -2.714794 | -0.688157 | 5.715455  |
| C | -4.794304 | 0.696656  | 3.394024  |
| H | -5.734480 | 1.236719  | 3.328680  |
| C | 3.681164  | -2.569544 | 1.718772  |
| H | 4.440675  | -2.064019 | 2.307075  |
| C | -4.300092 | 0.301507  | 4.661289  |
| H | -4.863991 | 0.538904  | 5.558765  |
| C | -4.091306 | 0.408257  | 2.245267  |
| H | -4.479477 | 0.729615  | 1.286356  |
| C | 3.776276  | -3.942593 | 1.473588  |
| H | 4.605607  | -4.512135 | 1.883471  |
| H | 2.351050  | -0.234603 | -3.139697 |
| C | 2.442555  | -0.708968 | -2.156091 |
| H | 2.186652  | -1.771176 | -2.236340 |
| C | 3.743478  | -0.530833 | -1.586639 |
| C | 4.823980  | -0.377031 | -1.038190 |
| C | 6.062668  | -0.193742 | -0.361487 |
| C | 6.661436  | 1.083736  | -0.280017 |
| C | 7.865953  | 1.260326  | 0.397985  |
| H | 8.310660  | 2.250635  | 0.450226  |
| C | 8.500856  | 0.175062  | 1.011470  |
| H | 9.439078  | 0.317454  | 1.540205  |
| H | 8.405498  | -1.944040 | 1.410131  |
| C | 7.918789  | -1.094693 | 0.937830  |
| C | 6.716471  | -1.282781 | 0.258376  |
| H | 6.265834  | -2.268680 | 0.202235  |
| H | 6.166253  | 1.928126  | -0.750587 |
| O | 2.102842  | 1.893930  | -1.828332 |
| C | 2.733077  | 2.663893  | -0.851536 |
| H | 2.027503  | 3.197705  | -0.180740 |
| H | 3.408407  | 2.077384  | -0.198656 |
| H | 3.357614  | 3.441116  | -1.327407 |

### Int1-C\_Cu

|                                             |              |
|---------------------------------------------|--------------|
| Charge                                      | 1            |
| Electronic Energy, BS1 (a.u.)               | -3084.089531 |
| Thermal and entropic correction, BS1 (a.u.) | 0.786339     |
| Electronic Energy, BS2 (a.u.)               | -5668.092190 |
| Number of Imaginary Frequencies             | 0            |
| Imaginary frequencies (cm-1)                | None         |

### Molecular Geometry in Cartesian Coordinates

|    |           |           |           |
|----|-----------|-----------|-----------|
| Cu | -0.506398 | 0.703806  | 0.703977  |
| Fe | 0.377923  | -1.299381 | -2.927959 |
| P  | -2.030446 | -0.028136 | -0.770930 |
| C  | -1.167377 | -0.068883 | -2.376068 |
| C  | 0.016094  | 0.707141  | -2.707809 |
| C  | 0.353373  | 0.434385  | -4.076449 |
| H  | 1.208222  | 0.839424  | -4.598328 |
| C  | -0.598150 | -0.485357 | -4.590010 |

|   |           |           |           |
|---|-----------|-----------|-----------|
| H | -0.586581 | -0.919842 | -5.580511 |
| C | -1.530289 | -0.790164 | -3.557953 |
| H | -2.353218 | -1.485553 | -3.635586 |
| C | 0.876205  | -2.501391 | -1.316957 |
| H | 0.470271  | -2.390159 | -0.324607 |
| C | 2.040011  | -1.841627 | -1.811480 |
| H | 2.651422  | -1.141680 | -1.260214 |
| C | 2.219153  | -2.216449 | -3.177612 |
| H | 2.991234  | -1.852847 | -3.842711 |
| C | 1.163595  | -3.115369 | -3.526422 |
| H | 0.996850  | -3.549615 | -4.503441 |
| C | 0.333442  | -3.290418 | -2.376663 |
| H | -0.573217 | -3.878388 | -2.327765 |
| O | 1.701815  | 2.353860  | -2.507546 |
| C | 0.818077  | 1.571497  | -1.848715 |
| N | 0.803708  | 1.668125  | -0.561566 |
| C | 1.792238  | 2.693601  | -0.168391 |
| C | 2.573790  | 2.967574  | -1.514180 |
| H | 2.597344  | 4.038214  | -1.723969 |
| H | 1.242741  | 3.600873  | 0.107017  |
| C | -3.501085 | 1.021673  | -1.122816 |
| C | -3.520507 | 1.931676  | -2.189762 |
| H | -2.677509 | 1.992913  | -2.871025 |
| C | -4.627561 | 2.761737  | -2.388196 |
| H | -4.632488 | 3.458759  | -3.221616 |
| C | -5.723606 | 2.689890  | -1.526835 |
| H | -6.584444 | 3.333293  | -1.684155 |
| C | -5.706853 | 1.789544  | -0.456795 |
| H | -6.552188 | 1.734400  | 0.222923  |
| C | -4.602076 | 0.964356  | -0.251660 |
| H | -4.598509 | 0.271186  | 0.585160  |
| C | -2.736110 | -1.709268 | -0.567630 |
| C | -2.201411 | -2.527254 | 0.438795  |
| H | -1.410300 | -2.144904 | 1.076485  |
| C | -2.676609 | -3.828725 | 0.617071  |
| H | -2.248395 | -4.453860 | 1.393590  |
| C | -3.694821 | -4.318117 | -0.203893 |
| H | -4.065054 | -5.330225 | -0.066697 |
| C | -4.247820 | -3.500691 | -1.195685 |
| H | -5.049772 | -3.874603 | -1.825964 |
| C | -3.775822 | -2.200031 | -1.374860 |
| H | -4.222640 | -1.564750 | -2.133642 |
| C | 2.661566  | 2.279578  | 0.996327  |
| C | 3.147621  | 3.252634  | 1.877297  |
| C | 3.059237  | 0.947436  | 1.164865  |
| C | 4.036364  | 2.904177  | 2.898203  |
| C | 3.940843  | 0.596120  | 2.187362  |
| C | 4.438825  | 1.575330  | 3.052114  |
| H | 2.838316  | 4.288102  | 1.755949  |
| H | 2.661747  | 0.187833  | 0.502987  |
| H | 4.409757  | 3.669012  | 3.573228  |
| H | 4.241608  | -0.441019 | 2.306128  |
| H | 5.127766  | 1.302874  | 3.846450  |
| C | 3.962694  | 2.380799  | -1.613961 |
| C | 5.040922  | 3.086893  | -1.064919 |
| C | 4.189082  | 1.124658  | -2.187723 |
| C | 6.321173  | 2.532967  | -1.064816 |
| C | 5.472552  | 0.572775  | -2.193188 |
| C | 6.540318  | 1.271103  | -1.625705 |

|   |           |           |           |
|---|-----------|-----------|-----------|
| H | 4.873963  | 4.065025  | -0.622266 |
| H | 3.366416  | 0.580051  | -2.636717 |
| H | 7.147673  | 3.087266  | -0.629376 |
| H | 5.634751  | -0.403835 | -2.641090 |
| H | 7.537552  | 0.840471  | -1.626604 |
| H | -0.722337 | -7.034285 | 1.781254  |
| C | -0.301326 | -5.509461 | 3.250541  |
| C | -0.127595 | -6.158089 | 2.023145  |
| C | 0.806688  | -5.670034 | 1.106589  |
| H | 0.937962  | -6.159654 | 0.145880  |
| C | 1.567632  | -4.540643 | 1.417659  |
| H | 2.285198  | -4.154639 | 0.699310  |
| H | 2.774713  | -2.310565 | 2.116812  |
| C | 2.272479  | -2.711380 | 2.999160  |
| H | 3.020810  | -2.970694 | 3.751498  |
| C | 1.405861  | -3.894888 | 2.648413  |
| H | 0.331516  | -3.882657 | 4.517670  |
| C | 0.463866  | -4.384443 | 3.563081  |
| H | -1.028551 | -5.883525 | 3.965718  |
| O | 1.513141  | -1.641947 | 3.640700  |
| C | 0.765218  | -0.879592 | 2.849065  |
| C | 1.039824  | 1.100062  | 4.383282  |
| H | 0.488876  | 1.803101  | 5.013274  |
| H | 1.647164  | 1.663166  | 3.672649  |
| H | 1.695618  | 0.497702  | 5.014821  |
| C | 0.039319  | 0.203227  | 3.633064  |
| H | -0.596146 | -0.315750 | 4.363778  |
| N | -0.781996 | 1.013265  | 2.718872  |
| C | -1.744480 | 1.667069  | 3.273074  |
| H | -1.959189 | 1.508922  | 4.335894  |
| C | -2.612650 | 2.635441  | 2.600526  |
| C | -2.253953 | 3.290595  | 1.407025  |
| H | -1.288365 | 3.094702  | 0.952115  |
| H | -2.843624 | 4.698545  | -0.104936 |
| C | -3.125945 | 4.201220  | 0.817744  |
| C | -4.365560 | 4.470605  | 1.407348  |
| H | -5.046798 | 5.174438  | 0.938685  |
| C | -4.724828 | 3.839376  | 2.601377  |
| H | -5.683176 | 4.053057  | 3.065052  |
| C | -3.849072 | 2.936314  | 3.200620  |
| H | -4.122151 | 2.448641  | 4.132895  |
| O | 0.681803  | -1.039179 | 1.639199  |

#### Int4-C\_Cu

|                                             |              |
|---------------------------------------------|--------------|
| Charge                                      | 0            |
| Electronic Energy, BS1 (a.u.)               | -3387.946191 |
| Thermal and entropic correction, BS1 (a.u.) | 0.831893     |
| Electronic Energy, BS2 (a.u.)               | -5972.086332 |
| Number of Imaginary Frequencies             | 0            |
| Imaginary frequencies (cm-1)                | None         |

#### Molecular Geometry in Cartesian Coordinates

|    |           |           |           |
|----|-----------|-----------|-----------|
| Cu | -0.094362 | 0.729601  | 0.351040  |
| Fe | -0.591875 | -2.172622 | -2.619884 |
| P  | -1.693053 | 0.788728  | -1.176864 |
| C  | -1.062506 | -0.174149 | -2.597545 |
| C  | 0.340331  | -0.371167 | -2.916081 |

|   |           |           |           |
|---|-----------|-----------|-----------|
| C | 0.418799  | -1.147649 | -4.120691 |
| H | 1.334839  | -1.480795 | -4.586863 |
| C | -0.905515 | -1.429690 | -4.548159 |
| H | -1.179797 | -2.036284 | -5.400853 |
| C | -1.811169 | -0.832209 | -3.624901 |
| H | -2.888378 | -0.900781 | -3.662566 |
| C | -1.007862 | -2.948624 | -0.744566 |
| H | -1.343915 | -2.364569 | 0.096233  |
| C | 0.355401  | -3.190466 | -1.085042 |
| H | 1.212920  | -2.804669 | -0.553099 |
| C | 0.384777  | -3.966250 | -2.284908 |
| H | 1.270713  | -4.281711 | -2.820067 |
| C | -0.967451 | -4.204021 | -2.685126 |
| H | -1.282491 | -4.730044 | -3.576852 |
| C | -1.826841 | -3.572933 | -1.733462 |
| H | -2.907137 | -3.534071 | -1.775422 |
| O | 2.674718  | 0.034338  | -2.868278 |
| C | 1.512120  | 0.073014  | -2.170301 |
| N | 1.577325  | 0.479935  | -0.950480 |
| C | 2.975058  | 0.885390  | -0.689726 |
| C | 3.751434  | 0.268969  | -1.914656 |
| H | 4.419708  | 1.010676  | -2.354820 |
| H | 3.017470  | 1.978048  | -0.761594 |
| C | -2.015498 | 2.441516  | -1.924479 |
| C | -1.481239 | 2.819143  | -3.165185 |
| H | -0.918260 | 2.106492  | -3.759625 |
| C | -1.669068 | 4.118127  | -3.647732 |
| H | -1.253288 | 4.397959  | -4.611919 |
| C | -2.389765 | 5.048916  | -2.896439 |
| H | -2.534912 | 6.058106  | -3.271908 |
| C | -2.922596 | 4.675509  | -1.657726 |
| H | -3.481959 | 5.395151  | -1.065831 |
| C | -2.736609 | 3.382406  | -1.166953 |
| H | -3.142338 | 3.108808  | -0.193155 |
| C | -3.352900 | 0.078944  | -0.873959 |
| C | -3.541930 | -0.674702 | 0.292688  |
| H | -2.745875 | -0.742384 | 1.026497  |
| C | -4.773088 | -1.287254 | 0.536032  |
| H | -4.908830 | -1.868681 | 1.441984  |
| C | -5.822805 | -1.138182 | -0.372811 |
| H | -6.781262 | -1.612272 | -0.179099 |
| C | -5.648667 | -0.360589 | -1.522966 |
| H | -6.470171 | -0.225964 | -2.221255 |
| C | -4.418992 | 0.249369  | -1.772112 |
| H | -4.290614 | 0.863351  | -2.658946 |
| C | 3.490186  | 0.476282  | 0.669723  |
| C | 4.418656  | 1.287296  | 1.330812  |
| C | 3.084072  | -0.720887 | 1.268968  |
| C | 4.929365  | 0.912823  | 2.576338  |
| C | 3.586173  | -1.095417 | 2.515393  |
| C | 4.511538  | -0.279169 | 3.173872  |
| H | 4.733221  | 2.221212  | 0.873657  |
| H | 2.351178  | -1.340054 | 0.768257  |
| H | 5.647029  | 1.554076  | 3.080588  |
| H | 3.252045  | -2.021322 | 2.974983  |
| H | 4.902222  | -0.570064 | 4.144943  |
| C | 4.493656  | -1.018842 | -1.644235 |
| C | 5.805077  | -0.959008 | -1.156387 |
| C | 3.878124  | -2.266467 | -1.800119 |

|   |           |           |           |
|---|-----------|-----------|-----------|
| C | 6.484393  | -2.127247 | -0.809289 |
| C | 4.559833  | -3.436407 | -1.457080 |
| C | 5.861807  | -3.370353 | -0.955685 |
| H | 6.288872  | 0.006404  | -1.034313 |
| H | 2.869266  | -2.326079 | -2.192176 |
| H | 7.499681  | -2.067219 | -0.427556 |
| H | 4.071079  | -4.398998 | -1.580511 |
| H | 6.390584  | -4.280313 | -0.686500 |
| H | -4.838233 | -4.658513 | 2.443957  |
| C | -3.579131 | -3.264573 | 3.506886  |
| C | -3.819899 | -4.337858 | 2.644513  |
| C | -2.744906 | -4.989825 | 2.034629  |
| H | -2.922555 | -5.817967 | 1.354232  |
| C | -1.437453 | -4.567856 | 2.284988  |
| H | -0.604076 | -5.066215 | 1.796439  |
| H | 0.882824  | -3.302459 | 2.589122  |
| C | 0.233599  | -3.089037 | 3.441939  |
| H | 0.623718  | -3.609029 | 4.320883  |
| C | -1.192121 | -3.496469 | 3.151894  |
| H | -2.089854 | -2.006480 | 4.425003  |
| C | -2.271254 | -2.847056 | 3.762572  |
| H | -4.409205 | -2.746650 | 3.978737  |
| O | 0.354984  | -1.687158 | 3.799024  |
| C | 0.210095  | -0.802840 | 2.808687  |
| C | 0.945897  | 0.873351  | 4.598742  |
| H | 0.739147  | 1.877072  | 4.978876  |
| H | 2.027697  | 0.747323  | 4.488212  |
| H | 0.589253  | 0.161445  | 5.344553  |
| C | 0.208846  | 0.638424  | 3.282214  |
| N | 0.561669  | 1.493762  | 2.140267  |
| C | 1.246637  | 2.559930  | 2.333137  |
| H | 1.661155  | 2.790937  | 3.315298  |
| C | 1.555537  | 3.541277  | 1.281917  |
| C | 0.701251  | 3.769034  | 0.190748  |
| H | -0.245565 | 3.246490  | 0.134422  |
| H | 0.370748  | 4.854831  | -1.631463 |
| C | 1.048827  | 4.685164  | -0.800490 |
| C | 2.254738  | 5.388529  | -0.712052 |
| H | 2.527847  | 6.100126  | -1.486236 |
| C | 3.097512  | 5.192930  | 0.387242  |
| H | 4.026461  | 5.750095  | 0.468099  |
| C | 2.742574  | 4.286505  | 1.386286  |
| H | 3.395452  | 4.133402  | 2.241239  |
| O | 0.016954  | -1.143280 | 1.648017  |
| H | -0.881921 | 0.823714  | 3.419076  |
| O | -2.738848 | 0.959092  | 2.969039  |
| C | -2.912065 | 2.116602  | 2.516456  |
| O | -1.944211 | 3.032254  | 3.000215  |
| O | -3.786677 | 2.560334  | 1.745437  |
| H | -1.919737 | 4.457100  | 1.459974  |
| C | -2.071515 | 4.371908  | 2.541906  |
| H | -3.055983 | 4.792712  | 2.779935  |
| H | -1.296851 | 4.951368  | 3.054763  |

**TS45-C\_Cu**

Charge

0

Electronic Energy, BS1 (a.u.)

-3387.934493

Thermal and entropic correction, BS1 (a.u.)

0.825707

Electronic Energy, BS2 (a.u.) -5972.071956  
 Number of Imaginary Frequencies 1  
 Imaginary frequencies (cm-1) -1422.6i

**Molecular Geometry in Cartesian Coordinates**

|    |           |           |           |
|----|-----------|-----------|-----------|
| Cu | -0.019774 | 0.712091  | 0.283435  |
| Fe | -0.311462 | -2.242186 | -2.666082 |
| P  | -1.469310 | 0.759307  | -1.382257 |
| C  | -0.721272 | -0.229640 | -2.725806 |
| C  | 0.701233  | -0.473355 | -2.894041 |
| C  | 0.878984  | -1.275657 | -4.070328 |
| H  | 1.827483  | -1.645228 | -4.432720 |
| C  | -0.402352 | -1.527909 | -4.628231 |
| H  | -0.605869 | -2.143280 | -5.494345 |
| C  | -1.379624 | -0.886594 | -3.814137 |
| H  | -2.448818 | -0.925749 | -3.962484 |
| C  | -0.855444 | -2.970474 | -0.800280 |
| H  | -1.180068 | -2.355278 | 0.023664  |
| C  | 0.501548  | -3.307481 | -1.082613 |
| H  | 1.361613  | -2.979098 | -0.515562 |
| C  | 0.527742  | -4.093428 | -2.276091 |
| H  | 1.411899  | -4.473361 | -2.771594 |
| C  | -0.820737 | -4.243349 | -2.730661 |
| H  | -1.134302 | -4.754839 | -3.631727 |
| C  | -1.673937 | -3.547168 | -1.818900 |
| H  | -2.746671 | -3.434394 | -1.906040 |
| O  | 3.034310  | -0.148713 | -2.590901 |
| C  | 1.801348  | -0.056114 | -2.032356 |
| N  | 1.742805  | 0.373004  | -0.820801 |
| C  | 3.112958  | 0.733227  | -0.404030 |
| C  | 4.002542  | 0.069182  | -1.522031 |
| H  | 4.739902  | 0.782036  | -1.894514 |
| H  | 3.203697  | 1.822389  | -0.485647 |
| C  | -1.757296 | 2.393812  | -2.177231 |
| C  | -1.077883 | 2.791698  | -3.337563 |
| H  | -0.416614 | 2.098735  | -3.848753 |
| C  | -1.245922 | 4.083911  | -3.845282 |
| H  | -0.716981 | 4.378865  | -4.747500 |
| C  | -2.090971 | 4.988585  | -3.199118 |
| H  | -2.220564 | 5.992194  | -3.594263 |
| C  | -2.769885 | 4.596306  | -2.040255 |
| H  | -3.429004 | 5.294021  | -1.530902 |
| C  | -2.603654 | 3.309818  | -1.527109 |
| H  | -3.127381 | 3.023782  | -0.618085 |
| C  | -3.149425 | 0.053573  | -1.194765 |
| C  | -3.427895 | -0.667504 | -0.024915 |
| H  | -2.675281 | -0.740372 | 0.753567  |
| C  | -4.678424 | -1.265829 | 0.146067  |
| H  | -4.883970 | -1.821484 | 1.054369  |
| C  | -5.657588 | -1.138116 | -0.841276 |
| H  | -6.630705 | -1.601903 | -0.704245 |
| C  | -5.393718 | -0.397818 | -1.998885 |
| H  | -6.160198 | -0.282070 | -2.760257 |
| C  | -4.145860 | 0.200400  | -2.173935 |
| H  | -3.949234 | 0.787798  | -3.066139 |
| C  | 3.433256  | 0.334416  | 1.017279  |
| C  | 4.331537  | 1.103205  | 1.765745  |
| C  | 2.854112  | -0.798149 | 1.599664  |
| C  | 4.642541  | 0.750213  | 3.080927  |

|   |           |           |           |
|---|-----------|-----------|-----------|
| C | 3.155201  | -1.147797 | 2.916448  |
| C | 4.050996  | -0.375195 | 3.661633  |
| H | 4.774989  | 1.990535  | 1.322263  |
| H | 2.131367  | -1.374896 | 1.035610  |
| H | 5.337189  | 1.358562  | 3.653717  |
| H | 2.682638  | -2.017747 | 3.363773  |
| H | 4.283147  | -0.645983 | 4.687914  |
| C | 4.668613  | -1.235349 | -1.150494 |
| C | 5.892272  | -1.204449 | -0.468749 |
| C | 4.065627  | -2.470047 | -1.416395 |
| C | 6.492440  | -2.388264 | -0.039346 |
| C | 4.668463  | -3.655964 | -0.989189 |
| C | 5.879609  | -3.618768 | -0.295106 |
| H | 6.367234  | -0.249304 | -0.261278 |
| H | 3.129646  | -2.507385 | -1.962134 |
| H | 7.438541  | -2.350392 | 0.493207  |
| H | 4.188636  | -4.607996 | -1.199427 |
| H | 6.346743  | -4.540778 | 0.039202  |
| H | -5.576642 | -4.290953 | 2.459906  |
| C | -4.299468 | -2.931982 | 3.547541  |
| C | -4.553903 | -3.990932 | 2.670349  |
| C | -3.487191 | -4.650722 | 2.054172  |
| H | -3.676048 | -5.463644 | 1.358453  |
| C | -2.173533 | -4.260292 | 2.323793  |
| H | -1.345487 | -4.770120 | 1.837923  |
| H | 0.194160  | -3.154938 | 2.759633  |
| C | -0.485686 | -2.859083 | 3.562321  |
| H | -0.180341 | -3.365020 | 4.483301  |
| C | -1.913077 | -3.211935 | 3.214558  |
| H | -2.788223 | -1.719090 | 4.496149  |
| C | -2.985597 | -2.544769 | 3.819134  |
| H | -5.124327 | -2.405758 | 4.019845  |
| O | -0.307008 | -1.459286 | 3.867234  |
| C | -0.226680 | -0.616353 | 2.811608  |
| C | 0.185406  | 1.158477  | 4.603750  |
| H | -0.129510 | 2.183770  | 4.826221  |
| H | 1.262176  | 1.079698  | 4.811230  |
| H | -0.339559 | 0.495751  | 5.293739  |
| C | -0.161896 | 0.794858  | 3.172788  |
| N | 0.393438  | 1.567664  | 2.104753  |
| C | 1.064803  | 2.643558  | 2.336724  |
| H | 1.316122  | 2.936050  | 3.356953  |
| C | 1.568131  | 3.532031  | 1.280353  |
| C | 0.881447  | 3.728272  | 0.069143  |
| H | -0.080611 | 3.252613  | -0.079094 |
| H | 0.865365  | 4.687449  | -1.852381 |
| C | 1.415351  | 4.545857  | -0.926562 |
| C | 2.640380  | 5.190143  | -0.725009 |
| H | 3.056967  | 5.826500  | -1.500896 |
| C | 3.315264  | 5.031616  | 0.490405  |
| H | 4.259492  | 5.541918  | 0.659836  |
| C | 2.777259  | 4.220140  | 1.489409  |
| H | 3.304956  | 4.092909  | 2.430968  |
| O | -0.285806 | -1.049630 | 1.649580  |
| H | -1.524584 | 1.075048  | 2.972906  |
| O | -2.705454 | 1.255283  | 2.677171  |
| C | -2.960763 | 2.435761  | 2.210434  |
| O | -1.982581 | 3.342876  | 2.536548  |
| O | -3.952518 | 2.770140  | 1.565172  |



|   |           |          |          |
|---|-----------|----------|----------|
| H | -2.079254 | 4.678001 | 0.926870 |
| C | -2.157071 | 4.665503 | 2.017800 |
| H | -3.126567 | 5.080484 | 2.309860 |
| H | -1.351165 | 5.264069 | 2.447072 |

### Int5-C\_Cu

|                                             |              |
|---------------------------------------------|--------------|
| Charge                                      | 0            |
| Electronic Energy, BS1 (a.u.)               | -3387.942359 |
| Thermal and entropic correction, BS1 (a.u.) | 0.830284     |
| Electronic Energy, BS2 (a.u.)               | -5972.080030 |
| Number of Imaginary Frequencies             | 0            |
| Imaginary frequencies (cm-1)                | None         |

### Molecular Geometry in Cartesian Coordinates

|    |           |           |           |
|----|-----------|-----------|-----------|
| Cu | -0.016148 | 0.649421  | 0.343101  |
| Fe | -0.250436 | -2.142315 | -2.756998 |
| P  | -1.416260 | 0.831227  | -1.360272 |
| C  | -0.655935 | -0.125857 | -2.720412 |
| C  | 0.767101  | -0.366534 | -2.880041 |
| C  | 0.959934  | -1.108712 | -4.092624 |
| H  | 1.912322  | -1.463322 | -4.459798 |
| C  | -0.314434 | -1.328387 | -4.680193 |
| H  | -0.507256 | -1.899027 | -5.578812 |
| C  | -1.301362 | -0.725410 | -3.848477 |
| H  | -2.368710 | -0.751072 | -4.013303 |
| C  | -0.866197 | -2.982410 | -0.959426 |
| H  | -1.247772 | -2.420242 | -0.121801 |
| C  | 0.513103  | -3.263483 | -1.188238 |
| H  | 1.332002  | -2.937388 | -0.562520 |
| C  | 0.624466  | -3.985106 | -2.416455 |
| H  | 1.543708  | -4.312083 | -2.884335 |
| C  | -0.693216 | -4.150753 | -2.947414 |
| H  | -0.944109 | -4.624090 | -3.887726 |
| C  | -1.612882 | -3.528803 | -2.047179 |
| H  | -2.682571 | -3.444625 | -2.185621 |
| O  | 3.092842  | -0.046242 | -2.528248 |
| C  | 1.852428  | 0.006663  | -1.980910 |
| N  | 1.773334  | 0.364948  | -0.747865 |
| C  | 3.133848  | 0.714790  | -0.294592 |
| C  | 4.045524  | 0.124511  | -1.437413 |
| H  | 4.778734  | 0.864811  | -1.761126 |
| H  | 3.213665  | 1.807846  | -0.312010 |
| C  | -1.646994 | 2.492666  | -2.121564 |
| C  | -0.890852 | 2.918208  | -3.223425 |
| H  | -0.199404 | 2.235740  | -3.707638 |
| C  | -1.020179 | 4.223388  | -3.708033 |
| H  | -0.431326 | 4.537794  | -4.565367 |
| C  | -1.901678 | 5.116899  | -3.096137 |
| H  | -2.001332 | 6.130722  | -3.473326 |
| C  | -2.657476 | 4.698795  | -1.995379 |
| H  | -3.347829 | 5.386143  | -1.514151 |
| C  | -2.530652 | 3.397917  | -1.507717 |
| H  | -3.121660 | 3.088885  | -0.650118 |
| C  | -3.116476 | 0.153039  | -1.258581 |
| C  | -3.432639 | -0.652856 | -0.155237 |
| H  | -2.694889 | -0.805334 | 0.626250  |
| C  | -4.696954 | -1.238486 | -0.056654 |

|   |           |           |           |
|---|-----------|-----------|-----------|
| H | -4.931462 | -1.860689 | 0.800047  |
| C | -5.653709 | -1.012406 | -1.048612 |
| H | -6.638123 | -1.465375 | -0.967203 |
| C | -5.351615 | -0.189811 | -2.139149 |
| H | -6.099183 | -0.000407 | -2.904570 |
| C | -4.088715 | 0.393595  | -2.243592 |
| H | -3.861523 | 1.040596  | -3.085803 |
| C | 3.458457  | 0.235806  | 1.100067  |
| C | 4.417353  | 0.922960  | 1.854454  |
| C | 2.844564  | -0.896958 | 1.643548  |
| C | 4.760926  | 0.482741  | 3.133744  |
| C | 3.179298  | -1.333252 | 2.926345  |
| C | 4.140221  | -0.647718 | 3.674536  |
| H | 4.885698  | 1.812878  | 1.441735  |
| H | 2.068126  | -1.403232 | 1.081620  |
| H | 5.504001  | 1.026166  | 3.711060  |
| H | 2.675043  | -2.198388 | 3.347631  |
| H | 4.398486  | -0.986806 | 4.673949  |
| C | 4.721251  | -1.190918 | -1.127706 |
| C | 5.961115  | -1.184499 | -0.475613 |
| C | 4.107377  | -2.415543 | -1.415625 |
| C | 6.567398  | -2.382719 | -0.097016 |
| C | 4.716187  | -3.615486 | -1.040140 |
| C | 5.944125  | -3.602848 | -0.374840 |
| H | 6.444901  | -0.237613 | -0.251707 |
| H | 3.158046  | -2.433490 | -1.938600 |
| H | 7.526373  | -2.363770 | 0.413061  |
| H | 4.227936  | -4.559462 | -1.266531 |
| H | 6.415757  | -4.536024 | -0.080085 |
| H | -6.071581 | -3.891014 | 2.583955  |
| C | -4.559562 | -2.664555 | 3.517931  |
| C | -5.007093 | -3.713816 | 2.709756  |
| C | -4.076674 | -4.523557 | 2.050518  |
| H | -4.415419 | -5.331043 | 1.406785  |
| C | -2.709211 | -4.292548 | 2.211748  |
| H | -1.987993 | -4.921645 | 1.694819  |
| H | -0.207559 | -3.354794 | 2.376991  |
| C | -0.770562 | -3.088370 | 3.275524  |
| H | -0.448293 | -3.744797 | 4.091003  |
| C | -2.255462 | -3.256322 | 3.038836  |
| H | -2.842424 | -1.624569 | 4.311583  |
| C | -3.190766 | -2.438806 | 3.683690  |
| H | -5.275977 | -2.020468 | 4.020839  |
| O | -0.406905 | -1.774132 | 3.718807  |
| C | -0.258381 | -0.820077 | 2.745349  |
| C | 0.430959  | 0.713678  | 4.669984  |
| H | 0.084622  | 1.704064  | 4.993796  |
| H | 1.515903  | 0.674097  | 4.857065  |
| H | -0.042418 | -0.033608 | 5.308294  |
| C | 0.095608  | 0.466077  | 3.224583  |
| N | 0.474327  | 1.363715  | 2.234386  |
| C | 1.170630  | 2.430237  | 2.510003  |
| H | 1.545232  | 2.596744  | 3.520459  |
| C | 1.562970  | 3.429055  | 1.518473  |
| C | 0.803753  | 3.706100  | 0.364141  |
| H | -0.142154 | 3.198498  | 0.219721  |
| H | 0.630662  | 4.837867  | -1.450795 |
| C | 1.239777  | 4.640892  | -0.573314 |
| C | 2.439798  | 5.333088  | -0.375581 |

|   |           |           |           |
|---|-----------|-----------|-----------|
| H | 2.778912  | 6.062506  | -1.105926 |
| C | 3.188598  | 5.093777  | 0.782264  |
| H | 4.115529  | 5.635291  | 0.952582  |
| C | 2.751058  | 4.161264  | 1.722431  |
| H | 3.340634  | 3.973942  | 2.616567  |
| O | -0.435967 | -1.135722 | 1.539912  |
| H | -1.789549 | 1.009142  | 2.839651  |
| O | -2.729163 | 1.136348  | 2.532316  |
| C | -2.961133 | 2.383683  | 2.135995  |
| O | -1.945005 | 3.206985  | 2.453265  |
| O | -3.985962 | 2.726878  | 1.578995  |
| H | -2.114210 | 4.690531  | 0.986820  |
| C | -2.112412 | 4.586880  | 2.073883  |
| H | -3.043247 | 4.986819  | 2.484035  |
| H | -1.254752 | 5.110080  | 2.495527  |

### Int6-C\_S\_NiCu

|                                             |              |
|---------------------------------------------|--------------|
| Charge                                      | 1            |
| Electronic Energy, BS1 (a.u.)               | -5980.406895 |
| Thermal and entropic correction, BS1 (a.u.) | 1.480112     |
| Electronic Energy, BS2 (a.u.)               | -9902.761123 |
| Number of Imaginary Frequencies             | 0            |
| Imaginary frequencies (cm-1)                | None         |

### Molecular Geometry in Cartesian Coordinates

|    |           |           |           |
|----|-----------|-----------|-----------|
| Cu | 2.631344  | 0.229022  | -0.306642 |
| Fe | 4.965865  | -3.216190 | -0.710127 |
| P  | 1.951304  | -1.626787 | -1.320977 |
| C  | 3.457837  | -2.476177 | -1.893292 |
| C  | 4.720196  | -1.822893 | -2.187632 |
| C  | 5.645581  | -2.824785 | -2.632705 |
| H  | 6.675443  | -2.638106 | -2.898716 |
| C  | 4.982296  | -4.079469 | -2.609626 |
| H  | 5.429680  | -5.035722 | -2.842596 |
| C  | 3.646525  | -3.872082 | -2.159065 |
| H  | 2.907260  | -4.641374 | -1.990426 |
| C  | 4.522849  | -2.817461 | 1.278959  |
| H  | 3.706156  | -2.200699 | 1.615234  |
| C  | 5.814075  | -2.316677 | 0.958970  |
| H  | 6.110618  | -1.281380 | 1.028949  |
| C  | 6.619145  | -3.407819 | 0.516575  |
| H  | 7.641830  | -3.348377 | 0.169176  |
| C  | 5.818407  | -4.591561 | 0.565538  |
| H  | 6.128109  | -5.580898 | 0.256888  |
| C  | 4.519324  | -4.223561 | 1.034368  |
| H  | 3.667071  | -4.881426 | 1.137900  |
| O  | 6.198566  | -0.045031 | -2.697929 |
| C  | 5.067919  | -0.416486 | -2.041782 |
| N  | 4.444669  | 0.504020  | -1.388387 |
| C  | 5.119782  | 1.781710  | -1.723988 |
| C  | 6.524824  | 1.290386  | -2.218784 |
| H  | 6.854975  | 1.871162  | -3.082377 |
| H  | 4.583999  | 2.194151  | -2.588833 |
| C  | 0.941509  | -1.431228 | -2.852257 |
| C  | -0.010891 | -0.399507 | -2.855666 |
| H  | -0.093001 | 0.241702  | -1.982248 |
| C  | -0.818044 | -0.174123 | -3.970217 |

|   |           |           |           |
|---|-----------|-----------|-----------|
| H | -1.543341 | 0.632823  | -3.956782 |
| C | -0.672689 | -0.974624 | -5.106450 |
| H | -1.291095 | -0.795809 | -5.981175 |
| C | 0.282225  | -1.994958 | -5.121141 |
| H | 0.406297  | -2.610812 | -6.007163 |
| C | 1.086908  | -2.222385 | -4.001561 |
| H | 1.836442  | -3.007266 | -4.027857 |
| C | 1.085676  | -2.954065 | -0.382322 |
| C | 1.085180  | -2.871208 | 1.019160  |
| H | 1.539663  | -2.011772 | 1.502238  |
| C | 0.503082  | -3.884398 | 1.781282  |
| H | 0.497498  | -3.808171 | 2.864190  |
| C | -0.092607 | -4.981169 | 1.154013  |
| H | -0.549078 | -5.766646 | 1.749451  |
| C | -0.118098 | -5.057370 | -0.239986 |
| H | -0.606245 | -5.892180 | -0.733318 |
| C | 0.467017  | -4.047675 | -1.004686 |
| H | 0.422770  | -4.105142 | -2.087232 |
| C | 5.137559  | 2.831650  | -0.647223 |
| C | 5.053828  | 4.177240  | -1.024663 |
| C | 5.312044  | 2.506211  | 0.701199  |
| C | 5.150438  | 5.189985  | -0.071155 |
| C | 5.412426  | 3.519260  | 1.654344  |
| C | 5.332589  | 4.860859  | 1.273703  |
| H | 4.890397  | 4.431600  | -2.068811 |
| H | 5.364462  | 1.464424  | 0.997506  |
| H | 5.077716  | 6.229896  | -0.375925 |
| H | 5.556113  | 3.267826  | 2.700014  |
| H | 5.412385  | 5.644099  | 2.021942  |
| C | 7.613947  | 1.222474  | -1.168958 |
| C | 8.259090  | 2.402322  | -0.775916 |
| C | 7.955541  | 0.019340  | -0.543384 |
| C | 9.207688  | 2.383036  | 0.245016  |
| C | 8.905363  | -0.000128 | 0.480123  |
| C | 9.530335  | 1.181059  | 0.881252  |
| H | 7.995748  | 3.343662  | -1.249622 |
| H | 7.483654  | -0.903832 | -0.857099 |
| H | 9.693311  | 3.306637  | 0.545203  |
| H | 9.151161  | -0.940319 | 0.964821  |
| H | 10.268881 | 1.166137  | 1.677385  |
| H | 8.450652  | -0.961974 | 3.583570  |
| C | 6.633670  | -1.903370 | 4.270006  |
| C | 7.383852  | -0.845874 | 3.749662  |
| C | 6.752852  | 0.359441  | 3.436093  |
| H | 7.323860  | 1.180240  | 3.011998  |
| C | 5.381244  | 0.504592  | 3.651119  |
| H | 4.884965  | 1.437372  | 3.415993  |
| H | 2.899526  | -0.326003 | 5.433171  |
| C | 3.124911  | -0.417754 | 4.365789  |
| H | 2.612492  | -1.307098 | 3.981614  |
| C | 4.620297  | -0.555320 | 4.149251  |
| H | 4.677399  | -2.599120 | 4.838060  |
| C | 5.258294  | -1.760999 | 4.459426  |
| H | 7.115452  | -2.846476 | 4.510811  |
| O | 2.563015  | 0.765604  | 3.789287  |
| C | 2.502134  | 0.805746  | 2.418211  |
| C | 1.945208  | 3.279706  | 2.690597  |
| H | 2.019551  | 3.041505  | 3.751109  |
| H | 0.954589  | 3.720361  | 2.507348  |

|    |           |           |           |
|----|-----------|-----------|-----------|
| H  | 2.690376  | 4.055765  | 2.463149  |
| C  | 2.165587  | 2.051674  | 1.857048  |
| N  | 2.086728  | 2.083867  | 0.484923  |
| C  | 1.865845  | 3.216725  | -0.140551 |
| H  | 1.776227  | 4.131939  | 0.442079  |
| C  | 1.775318  | 3.416307  | -1.576677 |
| C  | 1.853429  | 2.395496  | -2.547708 |
| H  | 1.994778  | 1.370869  | -2.226819 |
| H  | 1.828568  | 1.864238  | -4.623976 |
| C  | 1.771699  | 2.679972  | -3.908128 |
| C  | 1.606754  | 3.997286  | -4.353197 |
| H  | 1.545259  | 4.217835  | -5.414450 |
| C  | 1.523363  | 5.025059  | -3.407144 |
| H  | 1.399258  | 6.054405  | -3.732671 |
| C  | 1.604199  | 4.739659  | -2.046819 |
| H  | 1.548905  | 5.549920  | -1.323551 |
| Ni | -2.546602 | 0.590303  | 0.946694  |
| P  | -4.192129 | 1.493704  | -0.235040 |
| C  | -5.553148 | 2.199997  | 2.079675  |
| H  | -4.669341 | 1.815683  | 2.579554  |
| C  | -4.888764 | 0.236459  | -1.407459 |
| C  | -4.149683 | 4.026623  | -1.572277 |
| H  | -5.087043 | 4.269947  | -1.085703 |
| C  | -3.519032 | 2.802034  | -1.328634 |
| C  | -5.610166 | 2.181477  | 0.679262  |
| C  | -4.501250 | 0.269826  | -2.775279 |
| H  | -3.922990 | 1.104513  | -3.148905 |
| C  | -6.770008 | 2.627671  | 0.028101  |
| H  | -6.841260 | 2.576122  | -1.054194 |
| C  | -6.057625 | -1.875219 | -1.828009 |
| C  | -5.661654 | -0.824864 | -0.934460 |
| C  | -3.552276 | 4.959777  | -2.424604 |
| H  | -4.041206 | 5.913992  | -2.596148 |
| C  | -5.623700 | -1.841084 | -3.192453 |
| C  | -4.849156 | -0.741977 | -3.635642 |
| H  | -4.531795 | -0.704472 | -4.674175 |
| C  | -2.277243 | 2.537445  | -1.932651 |
| H  | -1.759904 | 1.610663  | -1.704338 |
| C  | -7.782260 | 3.125645  | 2.167208  |
| H  | -8.629826 | 3.483565  | 2.743381  |
| C  | -6.635056 | 2.671105  | 2.821002  |
| H  | -6.588639 | 2.669687  | 3.905713  |
| C  | -7.848175 | 3.104205  | 0.772049  |
| H  | -8.747750 | 3.437013  | 0.264286  |
| C  | -5.983226 | -2.900248 | -4.067647 |
| H  | -5.641959 | -2.861899 | -5.098525 |
| C  | -7.194962 | -3.982914 | -2.278947 |
| H  | -7.805257 | -4.812380 | -1.934540 |
| C  | -1.692461 | 3.458696  | -2.796541 |
| H  | -0.732319 | 3.242321  | -3.249624 |
| C  | -6.753463 | -3.950006 | -3.623493 |
| H  | -7.027875 | -4.752487 | -4.301402 |
| C  | -6.854211 | -2.976461 | -1.404170 |
| H  | -7.191333 | -3.020965 | -0.375609 |
| C  | -2.335227 | 4.674985  | -3.043847 |
| H  | -1.870319 | 5.403058  | -3.701384 |
| P  | -3.419671 | -1.416310 | 1.228965  |
| C  | -2.438051 | -2.240846 | -1.225120 |
| H  | -1.910546 | -1.294229 | -1.205809 |

|   |            |           |           |
|---|------------|-----------|-----------|
| C | -5.243652  | -1.240340 | 1.528563  |
| C | -2.640821  | -3.584245 | 2.924166  |
| H | -2.833750  | -4.252854 | 2.094849  |
| C | -2.803235  | -2.202557 | 2.772764  |
| C | -3.237716  | -2.609766 | -0.136636 |
| C | -5.728667  | -1.301989 | 2.864622  |
| H | -5.060258  | -1.585809 | 3.667545  |
| C | -3.939570  | -3.825466 | -0.174257 |
| H | -4.607661  | -4.097300 | 0.637191  |
| C | -7.488525  | -0.597711 | 0.783843  |
| C | -6.114429  | -0.893678 | 0.493535  |
| C | -2.189264  | -4.110139 | 4.137035  |
| H | -2.062592  | -5.183826 | 4.240319  |
| C | -7.949274  | -0.641480 | 2.139135  |
| C | -7.037446  | -1.007569 | 3.158731  |
| H | -7.387439  | -1.058117 | 4.186265  |
| C | -2.499327  | -1.356786 | 3.854891  |
| H | -2.609997  | -0.280522 | 3.743228  |
| C | -3.033686  | -4.279656 | -2.370021 |
| H | -2.968803  | -4.922386 | -3.242750 |
| C | -2.343172  | -3.067557 | -2.343107 |
| H | -1.734642  | -2.758844 | -3.185496 |
| C | -3.823918  | -4.661816 | -1.282662 |
| H | -4.380333  | -5.593070 | -1.313608 |
| C | -9.301755  | -0.319930 | 2.429895  |
| H | -9.634667  | -0.355547 | 3.463569  |
| C | -9.726053  | 0.066024  | 0.082417  |
| H | -10.419263 | 0.340072  | -0.707135 |
| C | -2.048652  | -1.883087 | 5.063922  |
| H | -1.814865  | -1.217046 | 5.888835  |
| C | -10.174610 | 0.025773  | 1.424409  |
| H | -11.207755 | 0.266450  | 1.655600  |
| C | -8.419737  | -0.234064 | -0.230023 |
| H | -8.089726  | -0.189572 | -1.260794 |
| C | -1.893271  | -3.265202 | 5.206904  |
| H | -1.539501  | -3.678464 | 6.146535  |
| H | -0.546478  | -0.518817 | 2.425978  |
| C | -0.631600  | 0.047333  | 1.503956  |
| H | -0.023672  | -0.336390 | 0.686458  |
| C | -0.838133  | 1.411857  | 1.559539  |
| C | -1.593553  | 2.403734  | 1.391297  |
| C | -1.902725  | 3.811789  | 1.343975  |
| C | -2.864643  | 4.360608  | 2.209733  |
| C | -3.177331  | 5.716228  | 2.140997  |
| H | -3.919563  | 6.131377  | 2.815946  |
| C | -2.540882  | 6.536824  | 1.206179  |
| H | -2.790214  | 7.592282  | 1.151097  |
| H | -1.091724  | 6.624387  | -0.392821 |
| C | -1.584633  | 5.995929  | 0.342659  |
| C | -1.262483  | 4.644008  | 0.408733  |
| H | -0.537372  | 4.218010  | -0.270191 |
| H | -3.359709  | 3.722312  | 2.931912  |
| O | 2.751651   | -0.251409 | 1.770340  |

**TS56-C\_S\_NiCu**

Charge

1

Electronic Energy, BS1 (a.u.)

-5980.396718

Thermal and entropic correction, BS1 (a.u.)

1.479765

Electronic Energy, BS2 (a.u.)

-9902.748579

Number of Imaginary Frequencies

1

Imaginary frequencies (cm-1)

-262.7i

**Molecular Geometry in Cartesian Coordinates**

|    |           |           |           |
|----|-----------|-----------|-----------|
| Cu | 2.769011  | 0.309510  | -0.387044 |
| Fe | 5.119672  | -3.108473 | -0.944915 |
| P  | 2.074761  | -1.515100 | -1.441824 |
| C  | 3.590797  | -2.312556 | -2.069213 |
| C  | 4.844798  | -1.624562 | -2.332176 |
| C  | 5.779998  | -2.585962 | -2.842108 |
| H  | 6.805757  | -2.370183 | -3.101924 |
| C  | 5.132023  | -3.847297 | -2.894866 |
| H  | 5.589292  | -4.781153 | -3.190866 |
| C  | 3.796855  | -3.685703 | -2.423435 |
| H  | 3.069479  | -4.474483 | -2.298819 |
| C  | 4.605382  | -3.004978 | 1.062380  |
| H  | 3.701981  | -2.556375 | 1.436378  |
| C  | 5.819263  | -2.299903 | 0.836142  |
| H  | 5.971085  | -1.248533 | 1.029376  |
| C  | 6.769839  | -3.218374 | 0.298399  |
| H  | 7.781330  | -2.987912 | -0.007108 |
| C  | 6.137105  | -4.495697 | 0.192526  |
| H  | 6.582536  | -5.392888 | -0.215442 |
| C  | 4.795147  | -4.361496 | 0.663691  |
| H  | 4.040615  | -5.136276 | 0.671187  |
| O  | 6.337848  | 0.190252  | -2.678849 |
| C  | 5.178670  | -0.224829 | -2.108283 |
| N  | 4.512965  | 0.661157  | -1.448465 |
| C  | 5.192297  | 1.959030  | -1.663092 |
| C  | 6.622161  | 1.508192  | -2.122001 |
| H  | 6.978986  | 2.131729  | -2.944062 |
| H  | 4.695192  | 2.431610  | -2.520385 |
| C  | 1.037436  | -1.266509 | -2.944127 |
| C  | 0.044660  | -0.274407 | -2.880446 |
| H  | -0.055408 | 0.319488  | -1.975544 |
| C  | -0.798210 | -0.039978 | -3.966975 |
| H  | -1.562545 | 0.727118  | -3.902801 |
| C  | -0.649323 | -0.788171 | -5.137883 |
| H  | -1.299837 | -0.602923 | -5.987517 |
| C  | 0.344020  | -1.767181 | -5.217162 |
| H  | 0.468392  | -2.344074 | -6.128944 |
| C  | 1.184631  | -2.005723 | -4.127004 |
| H  | 1.960500  | -2.761110 | -4.202185 |
| C  | 1.209806  | -2.857345 | -0.532039 |
| C  | 1.122903  | -2.749249 | 0.864314  |
| H  | 1.563325  | -1.890756 | 1.357638  |
| C  | 0.486713  | -3.739752 | 1.611391  |
| H  | 0.408277  | -3.638504 | 2.689054  |
| C  | -0.074352 | -4.845353 | 0.969140  |
| H  | -0.581142 | -5.610403 | 1.549479  |
| C  | -0.004809 | -4.954318 | -0.421084 |
| H  | -0.468591 | -5.795582 | -0.926022 |
| C  | 0.628491  | -3.962139 | -1.169788 |
| H  | 0.638855  | -4.034583 | -2.252638 |
| C  | 5.116226  | 2.916297  | -0.502512 |
| C  | 4.908950  | 4.275053  | -0.762013 |
| C  | 5.263530  | 2.486272  | 0.822032  |
| C  | 4.848730  | 5.199189  | 0.281711  |

|    |           |           |           |
|----|-----------|-----------|-----------|
| C  | 5.208688  | 3.410596  | 1.864228  |
| C  | 4.999184  | 4.766795  | 1.599892  |
| H  | 4.765656  | 4.609379  | -1.786285 |
| H  | 5.405384  | 1.431663  | 1.033348  |
| H  | 4.678087  | 6.249575  | 0.065153  |
| H  | 5.334077  | 3.080401  | 2.889912  |
| H  | 4.956353  | 5.480424  | 2.417542  |
| C  | 7.667853  | 1.407050  | -1.033967 |
| C  | 8.298917  | 2.573225  | -0.583036 |
| C  | 7.980881  | 0.184657  | -0.432219 |
| C  | 9.214108  | 2.519286  | 0.466998  |
| C  | 8.898541  | 0.130209  | 0.618271  |
| C  | 9.514969  | 1.296421  | 1.073326  |
| H  | 8.055779  | 3.528911  | -1.039234 |
| H  | 7.514104  | -0.724358 | -0.790118 |
| H  | 9.693395  | 3.430932  | 0.810682  |
| H  | 9.123601  | -0.824401 | 1.083604  |
| H  | 10.230133 | 1.254080  | 1.889601  |
| H  | 8.657154  | -1.077795 | 3.648762  |
| C  | 6.850870  | -2.154689 | 4.130149  |
| C  | 7.580553  | -1.017600 | 3.776426  |
| C  | 6.918659  | 0.196986  | 3.585348  |
| H  | 7.474925  | 1.081671  | 3.291184  |
| C  | 5.535806  | 0.270838  | 3.755209  |
| H  | 5.017323  | 1.211107  | 3.616827  |
| H  | 3.015204  | -0.843311 | 5.308307  |
| C  | 3.291774  | -0.815516 | 4.250170  |
| H  | 2.832936  | -1.675836 | 3.750237  |
| C  | 4.797053  | -0.866855 | 4.085805  |
| H  | 4.900720  | -2.977555 | 4.520801  |
| C  | 5.464829  | -2.080801 | 4.275264  |
| H  | 7.357114  | -3.104281 | 4.275620  |
| O  | 2.686620  | 0.399133  | 3.772085  |
| C  | 2.648977  | 0.567712  | 2.423291  |
| C  | 1.615114  | 2.849759  | 2.937830  |
| H  | 1.601466  | 2.475173  | 3.960693  |
| H  | 0.627611  | 3.273160  | 2.716047  |
| H  | 2.349535  | 3.664896  | 2.879887  |
| C  | 1.961496  | 1.747289  | 1.978575  |
| N  | 2.059787  | 1.986591  | 0.606675  |
| C  | 1.719688  | 3.147103  | 0.123084  |
| H  | 1.440900  | 3.950743  | 0.802440  |
| C  | 1.692519  | 3.518648  | -1.288983 |
| C  | 1.841706  | 2.613699  | -2.356216 |
| H  | 1.997145  | 1.562287  | -2.146671 |
| H  | 1.901335  | 2.322551  | -4.480534 |
| C  | 1.793696  | 3.047439  | -3.678571 |
| C  | 1.591049  | 4.400261  | -3.973107 |
| H  | 1.551370  | 4.737232  | -5.004547 |
| C  | 1.435042  | 5.313395  | -2.925292 |
| H  | 1.276724  | 6.366304  | -3.139706 |
| C  | 1.484335  | 4.878047  | -1.603633 |
| H  | 1.365388  | 5.594773  | -0.795269 |
| Ni | -2.768884 | 0.736607  | 0.994260  |
| P  | -4.406368 | 1.450654  | -0.265919 |
| C  | -5.897488 | 2.165298  | 1.964002  |
| H  | -5.016096 | 1.838697  | 2.507703  |
| C  | -5.037040 | 0.115315  | -1.386834 |
| C  | -4.415509 | 3.950539  | -1.683841 |



|   |           |           |           |
|---|-----------|-----------|-----------|
| H | -5.372811 | 4.176290  | -1.228137 |
| C | -3.766919 | 2.742541  | -1.407943 |
| C | -5.893198 | 2.110569  | 0.563402  |
| C | -4.697383 | 0.139476  | -2.767589 |
| H | -4.184836 | 1.000594  | -3.177175 |
| C | -7.046660 | 2.476295  | -0.146233 |
| H | -7.067754 | 2.396570  | -1.229251 |
| C | -6.079132 | -2.075853 | -1.720077 |
| C | -5.719097 | -0.984070 | -0.860843 |
| C | -3.813845 | 4.891103  | -2.525730 |
| H | -4.319120 | 5.832364  | -2.720171 |
| C | -5.694680 | -2.046732 | -3.099459 |
| C | -5.006136 | -0.912514 | -3.593541 |
| H | -4.727169 | -0.880743 | -4.643444 |
| C | -2.501401 | 2.503369  | -1.973586 |
| H | -1.969812 | 1.593532  | -1.710582 |
| C | -8.175965 | 2.966859  | 1.935545  |
| H | -9.066444 | 3.288657  | 2.466727  |
| C | -7.035003 | 2.591372  | 2.647461  |
| H | -7.036108 | 2.615152  | 3.732981  |
| C | -8.180038 | 2.910487  | 0.539687  |
| H | -9.073451 | 3.183448  | -0.013295 |
| C | -6.014516 | -3.146950 | -3.938647 |
| H | -5.710129 | -3.111189 | -4.981241 |
| C | -7.096603 | -4.260786 | -2.087963 |
| H | -7.643091 | -5.117608 | -1.705189 |
| C | -1.909669 | 3.432429  | -2.824785 |
| H | -0.925983 | 3.238144  | -3.239817 |
| C | -6.701718 | -4.232576 | -3.446976 |
| H | -6.946566 | -5.066322 | -4.098089 |
| C | -6.791321 | -3.214566 | -1.247294 |
| H | -7.092209 | -3.255122 | -0.207466 |
| C | -2.570989 | 4.632280  | -3.103121 |
| H | -2.103577 | 5.369157  | -3.749338 |
| P | -3.363783 | -1.391374 | 1.253527  |
| C | -2.372395 | -2.156646 | -1.216527 |
| H | -1.898406 | -1.181336 | -1.187666 |
| C | -5.190848 | -1.351214 | 1.594879  |
| C | -2.572431 | -3.562029 | 2.966907  |
| H | -2.905468 | -4.247803 | 2.198063  |
| C | -2.653390 | -2.177871 | 2.764245  |
| C | -3.144388 | -2.576146 | -0.125347 |
| C | -5.625433 | -1.418947 | 2.947915  |
| H | -4.909052 | -1.646723 | 3.728381  |
| C | -3.784127 | -3.824681 | -0.178840 |
| H | -4.442350 | -4.135675 | 0.626344  |
| C | -7.493151 | -0.844013 | 0.923553  |
| C | -6.113443 | -1.059538 | 0.586848  |
| C | -2.029504 | -4.073325 | 4.147021  |
| H | -1.969569 | -5.148655 | 4.288445  |
| C | -7.906561 | -0.909935 | 2.293346  |
| C | -6.938907 | -1.202127 | 3.285537  |
| H | -7.250318 | -1.260254 | 4.325193  |
| C | -2.185232 | -1.317808 | 3.771817  |
| H | -2.250123 | -0.242430 | 3.625207  |
| C | -2.873521 | -4.208207 | -2.385589 |
| H | -2.784479 | -4.835090 | -3.267880 |
| C | -2.242642 | -2.964214 | -2.345607 |
| H | -1.655958 | -2.615955 | -3.188369 |

|   |            |           |           |
|---|------------|-----------|-----------|
| C | -3.637122  | -4.640895 | -1.298914 |
| H | -4.153681  | -5.594482 | -1.340611 |
| C | -9.268832  | -0.684367 | 2.626199  |
| H | -9.564593  | -0.736764 | 3.670559  |
| C | -9.794249  | -0.342964 | 0.293311  |
| H | -10.529254 | -0.121279 | -0.474694 |
| C | -1.640811  | -1.828255 | 4.950772  |
| H | -1.282709  | -1.148728 | 5.718570  |
| C | -10.196550 | -0.409003 | 1.648619  |
| H | -11.236573 | -0.242263 | 1.912223  |
| C | -8.480240  | -0.550064 | -0.059570 |
| H | -8.186521  | -0.485303 | -1.100208 |
| C | -1.559394  | -3.210270 | 5.139340  |
| H | -1.135296  | -3.611799 | 6.054870  |
| H | -0.046608  | 0.022941  | 2.700883  |
| C | -0.063919  | 0.570708  | 1.763901  |
| H | 0.382466   | 0.080626  | 0.906118  |
| C | -0.991166  | 1.552119  | 1.566149  |
| C | -1.902151  | 2.418886  | 1.327912  |
| C | -2.181478  | 3.846590  | 1.247004  |
| C | -3.192878  | 4.420426  | 2.034663  |
| C | -3.486366  | 5.778977  | 1.926796  |
| H | -4.267713  | 6.210112  | 2.545779  |
| C | -2.787004  | 6.580753  | 1.021350  |
| H | -3.024668  | 7.636582  | 0.931440  |
| H | -1.249034  | 6.622094  | -0.494720 |
| C | -1.786903  | 6.014150  | 0.227290  |
| C | -1.481947  | 4.660719  | 0.342397  |
| H | -0.734135  | 4.213887  | -0.296625 |
| H | -3.746750  | 3.796091  | 2.726147  |
| O | 3.139219   | -0.301378 | 1.672452  |

#### Int6-C\_S\_NiCu

|                                             |              |
|---------------------------------------------|--------------|
| Charge                                      | 1            |
| Electronic Energy, BS1 (a.u.)               | -5980.438605 |
| Thermal and entropic correction, BS1 (a.u.) | 1.483070     |
| Electronic Energy, BS2 (a.u.)               | -9902.789011 |
| Number of Imaginary Frequencies             | 0            |
| Imaginary frequencies (cm-1)                | None         |

#### Molecular Geometry in Cartesian Coordinates

|    |          |           |           |
|----|----------|-----------|-----------|
| Cu | 2.580402 | -0.016897 | -0.415514 |
| Fe | 5.028790 | -3.490698 | -0.297086 |
| P  | 1.908751 | -2.064286 | -0.944024 |
| C  | 3.401704 | -2.985010 | -1.445198 |
| C  | 4.616929 | -2.389727 | -1.971755 |
| C  | 5.519955 | -3.452869 | -2.311449 |
| H  | 6.517823 | -3.316084 | -2.701373 |
| C  | 4.886665 | -4.685018 | -2.000298 |
| H  | 5.330395 | -5.665927 | -2.099011 |
| C  | 3.594048 | -4.403560 | -1.469948 |
| H  | 2.883978 | -5.129189 | -1.099179 |
| C  | 4.806293 | -2.665149 | 1.582667  |
| H  | 4.037018 | -1.955350 | 1.838183  |
| C  | 6.083465 | -2.327385 | 1.044418  |
| H  | 6.431716 | -1.329103 | 0.823109  |
| C  | 6.790799 | -3.539415 | 0.785774  |

|   |           |           |           |
|---|-----------|-----------|-----------|
| H | 7.773313  | -3.622076 | 0.341434  |
| C | 5.947276  | -4.628590 | 1.165134  |
| H | 6.180436  | -5.678819 | 1.055072  |
| C | 4.720254  | -4.088291 | 1.656100  |
| H | 3.854467  | -4.651180 | 1.976795  |
| O | 6.069426  | -0.698067 | -2.798007 |
| C | 4.948435  | -0.975657 | -2.087112 |
| N | 4.309555  | 0.034694  | -1.602664 |
| C | 4.977272  | 1.255703  | -2.110537 |
| C | 6.377021  | 0.708826  | -2.562821 |
| H | 6.654811  | 1.134190  | -3.529752 |
| H | 4.432595  | 1.557369  | -3.013861 |
| C | 0.826055  | -2.200747 | -2.426897 |
| C | -0.158666 | -1.216483 | -2.610863 |
| H | -0.250901 | -0.411290 | -1.885853 |
| C | -1.020365 | -1.273359 | -3.707172 |
| H | -1.785004 | -0.515734 | -3.833553 |
| C | -0.897920 | -2.305880 | -4.639806 |
| H | -1.566347 | -2.346396 | -5.494684 |
| C | 0.087048  | -3.281842 | -4.473455 |
| H | 0.190015  | -4.083065 | -5.199328 |
| C | 0.945433  | -3.230511 | -3.373484 |
| H | 1.711931  | -3.989649 | -3.260126 |
| C | 1.143221  | -3.145341 | 0.321881  |
| C | 1.305878  | -2.779407 | 1.667105  |
| H | 1.826828  | -1.859249 | 1.910533  |
| C | 0.796476  | -3.586949 | 2.682685  |
| H | 0.912160  | -3.289621 | 3.719654  |
| C | 0.100065  | -4.754793 | 2.361204  |
| H | -0.311043 | -5.376158 | 3.151481  |
| C | -0.093503 | -5.108063 | 1.024313  |
| H | -0.669042 | -5.992263 | 0.770344  |
| C | 0.428077  | -4.308288 | 0.006559  |
| H | 0.252239  | -4.576115 | -1.029712 |
| C | 4.936630  | 2.407596  | -1.140847 |
| C | 4.627208  | 3.690465  | -1.604007 |
| C | 5.187805  | 2.214316  | 0.222040  |
| C | 4.572691  | 4.769442  | -0.719158 |
| C | 5.132996  | 3.287810  | 1.108932  |
| C | 4.826524  | 4.568612  | 0.639096  |
| H | 4.402142  | 3.843063  | -2.656339 |
| H | 5.409438  | 1.220423  | 0.591099  |
| H | 4.326131  | 5.760058  | -1.089667 |
| H | 5.333194  | 3.125373  | 2.161128  |
| H | 4.786042  | 5.405553  | 1.330431  |
| C | 7.531580  | 0.836467  | -1.588826 |
| C | 8.063304  | 2.105141  | -1.318886 |
| C | 8.096503  | -0.282860 | -0.969498 |
| C | 9.123356  | 2.252619  | -0.426509 |
| C | 9.162368  | -0.135135 | -0.077428 |
| C | 9.676569  | 1.132094  | 0.199264  |
| H | 7.635506  | 2.982116  | -1.795129 |
| H | 7.713594  | -1.270805 | -1.196067 |
| H | 9.520212  | 3.242402  | -0.223051 |
| H | 9.594293  | -1.013742 | 0.393162  |
| H | 10.507805 | 1.246260  | 0.888723  |
| H | 8.649415  | 2.724861  | 3.484264  |
| C | 7.298714  | 1.097650  | 3.071687  |
| C | 7.670931  | 2.297279  | 3.681639  |

|    |           |           |           |
|----|-----------|-----------|-----------|
| C  | 6.784057  | 2.947454  | 4.544944  |
| H  | 7.075189  | 3.875568  | 5.027664  |
| C  | 5.520653  | 2.405176  | 4.784930  |
| H  | 4.826601  | 2.914793  | 5.448407  |
| H  | 3.395295  | 0.807379  | 5.388499  |
| C  | 3.750420  | 0.661938  | 4.367368  |
| H  | 3.683863  | -0.394528 | 4.099651  |
| C  | 5.137139  | 1.207632  | 4.166270  |
| H  | 5.739003  | -0.371087 | 2.841160  |
| C  | 6.037342  | 0.554984  | 3.316806  |
| H  | 7.980917  | 0.597039  | 2.392778  |
| O  | 2.773701  | 1.411659  | 3.567322  |
| C  | 2.641608  | 1.090432  | 2.285238  |
| C  | 1.451250  | 3.318142  | 2.131067  |
| H  | 1.394580  | 3.285843  | 3.218774  |
| H  | 0.560190  | 3.830951  | 1.772323  |
| H  | 2.339088  | 3.888423  | 1.845374  |
| C  | 1.533899  | 1.887001  | 1.583335  |
| N  | 1.768864  | 1.774098  | 0.124222  |
| C  | 1.378783  | 2.744718  | -0.624811 |
| H  | 0.970852  | 3.648466  | -0.177629 |
| C  | 1.435595  | 2.795770  | -2.090674 |
| C  | 1.682744  | 1.686611  | -2.914783 |
| H  | 1.816409  | 0.706604  | -2.474317 |
| H  | 1.944006  | 0.959966  | -4.918159 |
| C  | 1.759957  | 1.832121  | -4.297747 |
| C  | 1.586599  | 3.091173  | -4.882740 |
| H  | 1.648186  | 3.204168  | -5.961059 |
| C  | 1.313049  | 4.199225  | -4.075635 |
| H  | 1.158938  | 5.175807  | -4.523953 |
| C  | 1.230626  | 4.050735  | -2.693058 |
| H  | 1.003295  | 4.909323  | -2.068384 |
| Ni | -2.652562 | 0.944895  | 0.577237  |
| P  | -4.344955 | 1.333524  | -0.775541 |
| C  | -5.472946 | 3.124855  | 1.007285  |
| H  | -4.486534 | 3.090324  | 1.461321  |
| C  | -5.119265 | -0.233635 | -1.405066 |
| C  | -4.493286 | 3.167482  | -2.990251 |
| H  | -5.469517 | 3.474054  | -2.630029 |
| C  | -3.772615 | 2.178470  | -2.311494 |
| C  | -5.721103 | 2.360571  | -0.142922 |
| C  | -4.871763 | -0.650300 | -2.742543 |
| H  | -4.378148 | 0.027769  | -3.428430 |
| C  | -6.992455 | 2.392252  | -0.732970 |
| H  | -7.199266 | 1.781988  | -1.607173 |
| C  | -6.201314 | -2.391729 | -0.980834 |
| C  | -5.773383 | -1.099640 | -0.525990 |
| C  | -3.948318 | 3.783733  | -4.121036 |
| H  | -4.510444 | 4.561226  | -4.630155 |
| C  | -5.911207 | -2.802027 | -2.321914 |
| C  | -5.243483 | -1.897042 | -3.182590 |
| H  | -5.036307 | -2.198819 | -4.206191 |
| C  | -2.499098 | 1.822298  | -2.785191 |
| H  | -1.913484 | 1.107579  | -2.215356 |
| C  | -7.752573 | 3.929495  | 0.971542  |
| H  | -8.545467 | 4.528701  | 1.409393  |
| C  | -6.485887 | 3.908320  | 1.559686  |
| H  | -6.289055 | 4.494343  | 2.452715  |
| C  | -8.003939 | 3.173852  | -0.176085 |

|   |            |           |           |
|---|------------|-----------|-----------|
| H | -8.992545  | 3.176101  | -0.624586 |
| C | -6.305679  | -4.094739 | -2.758729 |
| H | -6.072664  | -4.392619 | -3.777710 |
| C | -7.279365  | -4.544298 | -0.593931 |
| H | -7.813435  | -5.220836 | 0.066838  |
| C | -1.964626  | 2.415952  | -3.926608 |
| H | -0.976727  | 2.130325  | -4.271473 |
| C | -6.976860  | -4.950158 | -1.915780 |
| H | -7.280084  | -5.933838 | -2.261790 |
| C | -6.898908  | -3.302669 | -0.137790 |
| H | -7.128251  | -3.008120 | 0.879306  |
| C | -2.690632  | 3.406743  | -4.594688 |
| H | -2.271297  | 3.888650  | -5.473195 |
| P | -3.305543  | -0.946933 | 1.499999  |
| C | -2.562459  | -2.542555 | -0.627955 |
| H | -2.099590  | -1.622966 | -0.964887 |
| C | -5.113740  | -0.703245 | 1.897881  |
| C | -2.269053  | -2.543459 | 3.672724  |
| H | -2.484830  | -3.429352 | 3.088822  |
| C | -2.538529  | -1.271461 | 3.153424  |
| C | -3.238769  | -2.544413 | 0.597576  |
| C | -5.479698  | -0.308471 | 3.215023  |
| H | -4.736377  | -0.318300 | 4.002484  |
| C | -3.883110  | -3.717859 | 1.019420  |
| H | -4.461963  | -3.721196 | 1.938175  |
| C | -7.433209  | -0.319489 | 1.194464  |
| C | -6.082254  | -0.701837 | 0.889564  |
| C | -1.689249  | -2.686128 | 4.936339  |
| H | -1.488347  | -3.681436 | 5.322868  |
| C | -7.766942  | 0.107274  | 2.519656  |
| C | -6.757997  | 0.094658  | 3.512984  |
| H | -7.010095  | 0.401406  | 4.524827  |
| C | -2.201122  | -0.145070 | 3.926191  |
| H | -2.385396  | 0.845082  | 3.518398  |
| C | -3.153658  | -4.853599 | -0.989749 |
| H | -3.139193  | -5.744876 | -1.610348 |
| C | -2.522459  | -3.686639 | -1.423544 |
| H | -2.010014  | -3.656511 | -2.379696 |
| C | -3.828930  | -4.868867 | 0.233858  |
| H | -4.347265  | -5.766146 | 0.557730  |
| C | -9.094271  | 0.521659  | 2.810396  |
| H | -9.326835  | 0.849238  | 3.820175  |
| C | -9.748313  | 0.066825  | 0.530781  |
| H | -10.520228 | 0.049151  | -0.233032 |
| C | -1.627946  | -0.287415 | 5.188858  |
| H | -1.382829  | 0.595216  | 5.773149  |
| C | -10.067659 | 0.503315  | 1.838795  |
| H | -11.080398 | 0.818344  | 2.071651  |
| C | -8.468529  | -0.329832 | 0.216355  |
| H | -8.239513  | -0.651168 | -0.792352 |
| C | -1.370053  | -1.562952 | 5.699437  |
| H | -0.924740  | -1.678373 | 6.683386  |
| H | 0.095532   | 1.070934  | 2.996142  |
| C | 0.228801   | 1.065833  | 1.908352  |
| H | 0.406602   | 0.024329  | 1.620584  |
| C | -0.996838  | 1.555740  | 1.233506  |
| C | -1.606135  | 2.543102  | 0.667460  |
| C | -1.721526  | 3.969858  | 0.422834  |
| C | -1.937573  | 4.839467  | 1.513074  |

|   |           |          |           |
|---|-----------|----------|-----------|
| C | -2.074931 | 6.212478 | 1.317019  |
| H | -2.242519 | 6.862183 | 2.171628  |
| C | -2.000964 | 6.753492 | 0.030536  |
| H | -2.112545 | 7.822799 | -0.121459 |
| H | -1.740270 | 6.305890 | -2.064967 |
| C | -1.790441 | 5.902475 | -1.057022 |
| C | -1.656542 | 4.527562 | -0.867762 |
| H | -1.504121 | 3.878251 | -1.718649 |
| H | -2.001537 | 4.419008 | 2.512800  |
| O | 3.262731  | 0.173643 | 1.756623  |

**Int5-C\_R\_NiCu**

|                                             |              |
|---------------------------------------------|--------------|
| Charge                                      | 1            |
| Electronic Energy, BS1 (a.u.)               | -5980.393881 |
| Thermal and entropic correction, BS1 (a.u.) | 1.477239     |
| Electronic Energy, BS2 (a.u.)               | -9902.752778 |
| Number of Imaginary Frequencies             | 0            |
| Imaginary frequencies (cm-1)                | None         |

**Molecular Geometry in Cartesian Coordinates**

|    |           |           |           |
|----|-----------|-----------|-----------|
| Cu | -3.535411 | -0.507227 | 0.607174  |
| Fe | -6.687171 | 1.036239  | -1.717262 |
| P  | -5.692021 | -0.972036 | 0.927925  |
| C  | -6.622573 | 0.438926  | 0.250584  |
| C  | -6.085654 | 1.778963  | 0.097630  |
| C  | -7.124676 | 2.614337  | -0.433577 |
| H  | -7.011389 | 3.658942  | -0.683434 |
| C  | -8.282380 | 1.813766  | -0.617159 |
| H  | -9.216100 | 2.143719  | -1.051149 |
| C  | -7.980621 | 0.486254  | -0.196073 |
| H  | -8.642771 | -0.366245 | -0.247033 |
| C  | -5.276972 | 0.003029  | -2.830601 |
| H  | -4.459775 | -0.557950 | -2.395923 |
| C  | -5.255402 | 1.390024  | -3.174452 |
| H  | -4.415978 | 2.059157  | -3.049497 |
| C  | -6.547627 | 1.750230  | -3.658593 |
| H  | -6.860048 | 2.740518  | -3.960809 |
| C  | -7.372573 | 0.585695  | -3.617903 |
| H  | -8.420356 | 0.540011  | -3.881874 |
| C  | -6.589015 | -0.491779 | -3.106617 |
| H  | -6.938623 | -1.494646 | -2.906072 |
| O  | -4.590111 | 3.596499  | 0.377550  |
| C  | -4.730828 | 2.249941  | 0.360052  |
| N  | -3.658191 | 1.556651  | 0.563760  |
| C  | -2.522224 | 2.499245  | 0.622690  |
| C  | -3.257970 | 3.855318  | 0.908957  |
| H  | -3.373802 | 3.948584  | 1.996759  |
| H  | -1.889101 | 2.250619  | 1.479839  |
| C  | -6.238440 | -1.069407 | 2.677420  |
| C  | -7.391772 | -0.449584 | 3.179533  |
| H  | -8.036737 | 0.120874  | 2.518359  |
| C  | -7.708438 | -0.552804 | 4.535942  |
| H  | -8.601880 | -0.067768 | 4.918678  |
| C  | -6.879449 | -1.273794 | 5.397994  |
| H  | -7.126028 | -1.347073 | 6.453201  |
| C  | -5.727546 | -1.891071 | 4.903982  |
| H  | -5.068469 | -2.435908 | 5.573276  |

|   |           |           |           |
|---|-----------|-----------|-----------|
| C | -5.405471 | -1.786133 | 3.552189  |
| H | -4.492268 | -2.236597 | 3.173866  |
| C | -6.468843 | -2.421916 | 0.114989  |
| C | -5.752637 | -3.034270 | -0.924412 |
| H | -4.771421 | -2.650352 | -1.183941 |
| C | -6.303384 | -4.115418 | -1.614511 |
| H | -5.743854 | -4.584901 | -2.418875 |
| C | -7.566751 | -4.598385 | -1.264293 |
| H | -7.994335 | -5.441961 | -1.798250 |
| C | -8.274548 | -4.005870 | -0.214323 |
| H | -9.249745 | -4.390829 | 0.069435  |
| C | -7.726979 | -2.924523 | 0.477532  |
| H | -8.270361 | -2.479976 | 1.306667  |
| C | -1.688374 | 2.446061  | -0.649740 |
| C | -0.537505 | 3.238507  | -0.758006 |
| C | -2.042938 | 1.625684  | -1.723289 |
| C | 0.224018  | 3.231330  | -1.923881 |
| C | -1.272390 | 1.601336  | -2.887996 |
| C | -0.140967 | 2.408971  | -2.994258 |
| H | -0.250531 | 3.881422  | 0.063860  |
| H | -2.896138 | 0.970872  | -1.636507 |
| H | 1.104001  | 3.862059  | -1.994970 |
| H | -1.553767 | 0.938568  | -3.697864 |
| H | 0.460242  | 2.388472  | -3.898011 |
| C | -2.698816 | 5.126935  | 0.346145  |
| C | -1.942124 | 5.965949  | 1.170714  |
| C | -2.865190 | 5.456979  | -1.003829 |
| C | -1.335284 | 7.109818  | 0.649230  |
| C | -2.270550 | 6.605572  | -1.522231 |
| C | -1.497857 | 7.430291  | -0.699848 |
| H | -1.825735 | 5.720378  | 2.223357  |
| H | -3.452817 | 4.804820  | -1.641132 |
| H | -0.751197 | 7.756680  | 1.297550  |
| H | -2.405060 | 6.855562  | -2.570346 |
| H | -1.033981 | 8.323907  | -1.106750 |
| H | 0.717623  | 0.263636  | -6.072797 |
| C | 0.723482  | -0.943974 | -4.282694 |
| C | 0.151128  | -0.413656 | -5.440317 |
| C | -1.163362 | -0.751367 | -5.770904 |
| H | -1.626677 | -0.335157 | -6.660575 |
| C | -1.890110 | -1.616470 | -4.950638 |
| H | -2.917100 | -1.864498 | -5.208171 |
| H | -1.988325 | -4.177127 | -3.462424 |
| C | -2.103248 | -3.188776 | -3.003423 |
| H | -3.165101 | -2.924554 | -3.021815 |
| C | -1.312903 | -2.169120 | -3.800564 |
| H | 0.450714  | -2.227754 | -2.571886 |
| C | 0.001809  | -1.822426 | -3.470859 |
| H | 1.738589  | -0.665883 | -4.012579 |
| O | -1.659967 | -3.375739 | -1.657123 |
| C | -2.115689 | -2.457259 | -0.733641 |
| C | -1.281265 | -4.077640 | 1.068580  |
| H | -1.194276 | -4.772308 | 0.234619  |
| H | -1.945727 | -4.523863 | 1.823010  |
| H | -0.289293 | -3.994734 | 1.531243  |
| C | -1.828421 | -2.757285 | 0.613248  |
| N | -2.122181 | -1.755512 | 1.510310  |
| C | -1.762116 | -1.841970 | 2.770274  |
| H | -1.214956 | -2.721314 | 3.112906  |

|    |           |           |           |
|----|-----------|-----------|-----------|
| C  | -1.987531 | -0.829979 | 3.793662  |
| C  | -2.770757 | 0.331010  | 3.618740  |
| H  | -3.271651 | 0.497056  | 2.673843  |
| H  | -3.558854 | 2.127634  | 4.481801  |
| C  | -2.937027 | 1.251409  | 4.648478  |
| C  | -2.330132 | 1.050481  | 5.892943  |
| H  | -2.466816 | 1.767079  | 6.697111  |
| C  | -1.556830 | -0.098577 | 6.090565  |
| H  | -1.083762 | -0.276532 | 7.052377  |
| C  | -1.390148 | -1.021938 | 5.060146  |
| H  | -0.788475 | -1.912059 | 5.230435  |
| Ni | 2.583138  | -0.757492 | 0.068868  |
| P  | 4.598948  | -1.569175 | -0.373957 |
| C  | 5.001608  | -2.151572 | 2.314343  |
| H  | 3.986556  | -1.783002 | 2.432642  |
| C  | 5.667391  | -0.301146 | -1.205677 |
| C  | 5.089462  | -4.144240 | -1.535531 |
| H  | 5.747542  | -4.366630 | -0.703598 |
| C  | 4.442134  | -2.907589 | -1.617918 |
| C  | 5.576396  | -2.186410 | 1.035637  |
| C  | 5.886305  | -0.380773 | -2.608766 |
| H  | 5.548901  | -1.249790 | -3.158203 |
| C  | 6.903961  | -2.613523 | 0.884849  |
| H  | 7.371337  | -2.604041 | -0.095350 |
| C  | 6.815094  | 1.863053  | -1.186571 |
| C  | 6.138706  | 0.803478  | -0.495662 |
| C  | 4.859062  | -5.116311 | -2.512645 |
| H  | 5.352517  | -6.079954 | -2.432780 |
| C  | 6.982746  | 1.784772  | -2.606424 |
| C  | 6.518846  | 0.632532  | -3.285876 |
| H  | 6.670040  | 0.556304  | -4.359271 |
| C  | 3.551642  | -2.668496 | -2.678253 |
| H  | 3.011565  | -1.728035 | -2.716336 |
| C  | 7.056455  | -2.988320 | 3.269421  |
| H  | 7.635474  | -3.290698 | 4.136409  |
| C  | 5.738951  | -2.552492 | 3.426845  |
| H  | 5.291479  | -2.509983 | 4.414992  |
| C  | 7.636703  | -3.019774 | 1.999197  |
| H  | 8.666626  | -3.340372 | 1.879025  |
| C  | 7.607471  | 2.856799  | -3.297477 |
| H  | 7.723951  | 2.783811  | -4.375296 |
| C  | 7.906697  | 4.041626  | -1.212297 |
| H  | 8.269667  | 4.915956  | -0.680401 |
| C  | 3.334275  | -3.630877 | -3.658958 |
| H  | 2.634657  | -3.426242 | -4.463513 |
| C  | 8.059475  | 3.964173  | -2.617635 |
| H  | 8.537681  | 4.778007  | -3.154100 |
| C  | 7.301810  | 3.020401  | -0.515248 |
| H  | 7.186178  | 3.097388  | 0.559184  |
| C  | 3.993372  | -4.860704 | -3.576312 |
| H  | 3.817901  | -5.623300 | -4.328948 |
| P  | 3.186482  | 1.298215  | 0.578725  |
| C  | 3.168649  | 1.890282  | -2.129208 |
| H  | 2.704754  | 0.913295  | -2.221398 |
| C  | 4.750837  | 1.245780  | 1.575605  |
| C  | 1.779215  | 3.521256  | 1.706820  |
| H  | 2.287812  | 4.162507  | 0.997105  |
| C  | 1.993495  | 2.137468  | 1.697083  |
| C  | 3.500476  | 2.379013  | -0.857628 |



|   |           |           |           |
|---|-----------|-----------|-----------|
| C | 4.657792  | 1.363011  | 2.990923  |
| H | 3.712977  | 1.629209  | 3.447744  |
| C | 4.102010  | 3.641385  | -0.740305 |
| H | 4.419725  | 4.006869  | 0.231101  |
| C | 7.128055  | 0.698921  | 1.815791  |
| C | 5.974697  | 0.918939  | 0.989801  |
| C | 0.872497  | 4.085662  | 2.607838  |
| H | 0.700741  | 5.157282  | 2.588245  |
| C | 7.007035  | 0.801797  | 3.238999  |
| C | 5.750108  | 1.145031  | 3.794095  |
| H | 5.657646  | 1.239155  | 4.872750  |
| C | 1.291255  | 1.331629  | 2.610937  |
| H | 1.440537  | 0.254455  | 2.608966  |
| C | 4.008418  | 3.916529  | -3.141270 |
| H | 4.212588  | 4.511366  | -4.026123 |
| C | 3.429109  | 2.652354  | -3.266278 |
| H | 3.176803  | 2.260132  | -4.246668 |
| C | 4.341369  | 4.411134  | -1.877576 |
| H | 4.816959  | 5.381535  | -1.780232 |
| C | 8.141901  | 0.559616  | 4.057764  |
| H | 8.032811  | 0.640179  | 5.135834  |
| C | 9.482135  | 0.133091  | 2.092657  |
| H | 10.442406 | -0.126218 | 1.657158  |
| C | 0.394090  | 1.895388  | 3.516602  |
| H | -0.139415 | 1.261659  | 4.213965  |
| C | 9.355840  | 0.233016  | 3.498925  |
| H | 10.218976 | 0.052968  | 4.132461  |
| C | 8.399225  | 0.357111  | 1.273239  |
| H | 8.510219  | 0.268323  | 0.199347  |
| C | 0.179867  | 3.276710  | 3.510027  |
| H | -0.530003 | 3.711298  | 4.207486  |
| H | 0.080553  | 0.235496  | 0.645282  |
| C | 0.558458  | -0.270728 | -0.186922 |
| H | 0.337555  | 0.161422  | -1.161719 |
| C | 0.799100  | -1.624394 | -0.093099 |
| C | 1.634523  | -2.567867 | 0.024436  |
| C | 1.927481  | -3.983137 | 0.021528  |
| C | 1.377644  | -4.810417 | -0.974463 |
| C | 1.659786  | -6.173491 | -0.981095 |
| H | 1.230031  | -6.804926 | -1.752945 |
| C | 2.484495  | -6.730304 | 0.000272  |
| H | 2.699114  | -7.794729 | -0.009088 |
| H | 3.663058  | -6.341302 | 1.765757  |
| C | 3.026342  | -5.914921 | 0.996385  |
| C | 2.754254  | -4.549162 | 1.005827  |
| H | 3.179000  | -3.915396 | 1.774134  |
| H | 0.712105  | -4.380245 | -1.712871 |
| O | -2.726054 | -1.434016 | -1.155263 |

### TS56-C\_R\_NiCu

|                                             |              |
|---------------------------------------------|--------------|
| Charge                                      | 1            |
| Electronic Energy, BS1 (a.u.)               | -5980.383860 |
| Thermal and entropic correction, BS1 (a.u.) | 1.4742901    |
| Electronic Energy, BS2 (a.u.)               | -9902.742598 |
| Number of Imaginary Frequencies             | 1            |
| Imaginary frequencies (cm-1)                | -140.5i      |

## Molecular Geometry in Cartesian Coordinates

|    |           |           |           |
|----|-----------|-----------|-----------|
| Cu | -3.864590 | -0.475995 | 0.563802  |
| Fe | -7.213643 | 0.984307  | -1.397683 |
| P  | -5.912197 | -1.322699 | 0.807849  |
| C  | -7.062683 | 0.031898  | 0.415659  |
| C  | -6.748144 | 1.442135  | 0.547201  |
| C  | -7.905033 | 2.193532  | 0.149699  |
| H  | -7.960962 | 3.271455  | 0.114395  |
| C  | -8.919019 | 1.273404  | -0.224410 |
| H  | -9.893063 | 1.531469  | -0.616236 |
| C  | -8.410143 | -0.046934 | -0.058190 |
| H  | -8.928034 | -0.964574 | -0.296999 |
| C  | -5.711227 | 0.298602  | -2.654318 |
| H  | -4.860305 | -0.276160 | -2.318097 |
| C  | -5.769578 | 1.722639  | -2.699092 |
| H  | -4.973414 | 2.394896  | -2.415154 |
| C  | -7.072595 | 2.103897  | -3.137818 |
| H  | -7.440744 | 3.115872  | -3.238625 |
| C  | -7.822450 | 0.910492  | -3.370962 |
| H  | -8.858985 | 0.861502  | -3.675509 |
| C  | -6.982383 | -0.204302 | -3.070260 |
| H  | -7.269579 | -1.246361 | -3.095733 |
| O  | -5.554209 | 3.378198  | 1.198987  |
| C  | -5.477301 | 2.059587  | 0.904423  |
| N  | -4.303262 | 1.523956  | 0.933987  |
| C  | -3.331827 | 2.571142  | 1.301014  |
| C  | -4.196818 | 3.896558  | 1.238108  |
| H  | -4.096851 | 4.459193  | 2.169363  |
| H  | -3.018414 | 2.400561  | 2.338846  |
| C  | -6.393925 | -1.833051 | 2.503376  |
| C  | -7.479007 | -1.283809 | 3.199717  |
| H  | -8.122899 | -0.553983 | 2.719184  |
| C  | -7.731387 | -1.667120 | 4.519598  |
| H  | -8.572852 | -1.234732 | 5.053305  |
| C  | -6.907102 | -2.599953 | 5.150063  |
| H  | -7.101914 | -2.890764 | 6.178108  |
| C  | -5.825693 | -3.153855 | 4.459247  |
| H  | -5.169673 | -3.865308 | 4.950891  |
| C  | -5.567632 | -2.769774 | 3.145941  |
| H  | -4.705925 | -3.174682 | 2.623221  |
| C  | -6.479835 | -2.694858 | -0.268218 |
| C  | -5.698716 | -3.006783 | -1.391021 |
| H  | -4.777369 | -2.459195 | -1.564073 |
| C  | -6.107551 | -4.007623 | -2.274342 |
| H  | -5.499863 | -4.243201 | -3.143405 |
| C  | -7.290694 | -4.710773 | -2.034812 |
| H  | -7.607321 | -5.491829 | -2.719742 |
| C  | -8.059802 | -4.420823 | -0.903689 |
| H  | -8.971031 | -4.978479 | -0.708086 |
| C  | -7.655039 | -3.419761 | -0.020047 |
| H  | -8.243947 | -3.207746 | 0.868078  |
| C  | -2.111981 | 2.571728  | 0.413966  |
| C  | -0.900262 | 3.074399  | 0.897034  |
| C  | -2.202807 | 2.167734  | -0.921375 |
| C  | 0.195799  | 3.215509  | 0.045290  |
| C  | -1.107616 | 2.295371  | -1.771975 |
| C  | 0.088527  | 2.832687  | -1.293502 |
| H  | -0.816709 | 3.366836  | 1.940507  |
| H  | -3.123272 | 1.730125  | -1.285020 |

|    |           |           |           |
|----|-----------|-----------|-----------|
| H  | 1.127197  | 3.624386  | 0.420100  |
| H  | -1.190218 | 1.978910  | -2.803440 |
| H  | 0.935335  | 2.942797  | -1.961285 |
| C  | -3.956588 | 4.801656  | 0.050779  |
| C  | -2.857364 | 5.668636  | 0.060858  |
| C  | -4.785641 | 4.765224  | -1.074664 |
| C  | -2.571082 | 6.459799  | -1.050030 |
| C  | -4.501204 | 5.560968  | -2.186374 |
| C  | -3.389773 | 6.404135  | -2.180789 |
| H  | -2.211055 | 5.709904  | 0.932822  |
| H  | -5.659007 | 4.123696  | -1.077265 |
| H  | -1.710591 | 7.121916  | -1.031839 |
| H  | -5.152521 | 5.522637  | -3.054949 |
| H  | -3.167952 | 7.021857  | -3.045822 |
| H  | 0.884503  | 2.375217  | -5.423016 |
| C  | 0.946439  | 0.619842  | -4.166952 |
| C  | 0.330070  | 1.527227  | -5.032054 |
| C  | -1.009427 | 1.342407  | -5.382784 |
| H  | -1.502508 | 2.048830  | -6.043871 |
| C  | -1.723785 | 0.257177  | -4.869981 |
| H  | -2.771054 | 0.128619  | -5.132346 |
| H  | -1.662401 | -2.732011 | -4.216046 |
| C  | -1.876623 | -1.884067 | -3.557109 |
| H  | -2.951339 | -1.686196 | -3.580296 |
| C  | -1.106008 | -0.664286 | -4.016420 |
| H  | 0.725559  | -1.171731 | -2.997456 |
| C  | 0.237104  | -0.474088 | -3.667508 |
| H  | 1.984312  | 0.765821  | -3.880265 |
| O  | -1.490208 | -2.354368 | -2.255727 |
| C  | -2.083513 | -1.761838 | -1.176583 |
| C  | -0.903349 | -3.559902 | 0.216533  |
| H  | -0.583769 | -3.925827 | -0.756479 |
| H  | -1.542546 | -4.326342 | 0.677370  |
| H  | -0.003908 | -3.467967 | 0.838264  |
| C  | -1.649330 | -2.260894 | 0.088905  |
| N  | -2.246883 | -1.667173 | 1.188113  |
| C  | -1.977256 | -2.091418 | 2.396201  |
| H  | -1.305668 | -2.940560 | 2.530590  |
| C  | -2.491502 | -1.528901 | 3.637073  |
| C  | -3.243386 | -0.341064 | 3.719574  |
| H  | -3.484575 | 0.197938  | 2.813279  |
| H  | -4.285720 | 1.047469  | 4.979082  |
| C  | -3.695967 | 0.135443  | 4.945119  |
| C  | -3.403656 | -0.552042 | 6.127805  |
| H  | -3.760394 | -0.178585 | 7.082747  |
| C  | -2.651398 | -1.728789 | 6.066391  |
| H  | -2.418194 | -2.274246 | 6.976281  |
| C  | -2.203396 | -2.209511 | 4.838266  |
| H  | -1.626604 | -3.131146 | 4.800130  |
| Ni | 3.215939  | -0.891121 | -0.202845 |
| P  | 5.252256  | -1.095597 | -0.968805 |
| C  | 5.793211  | -2.934598 | 1.051956  |
| H  | 4.721555  | -2.886752 | 1.225384  |
| C  | 6.101634  | 0.547520  | -1.055691 |
| C  | 6.267609  | -2.563598 | -3.213657 |
| H  | 7.101322  | -2.876611 | -2.595667 |
| C  | 5.273139  | -1.725505 | -2.694808 |
| C  | 6.356101  | -2.167060 | 0.021037  |
| C  | 6.225370  | 1.180623  | -2.323567 |

|   |          |           |           |
|---|----------|-----------|-----------|
| H | 5.955728 | 0.636179  | -3.220616 |
| C | 7.744058 | -2.199024 | -0.182263 |
| H | 8.197200 | -1.569902 | -0.942330 |
| C | 6.948188 | 2.586214  | 0.005327  |
| C | 6.460190 | 1.239588  | 0.103780  |
| C | 6.172246 | -3.032836 | -4.525454 |
| H | 6.941319 | -3.693168 | -4.914924 |
| C | 7.045844 | 3.211803  | -1.279509 |
| C | 6.680976 | 2.471415  | -2.430569 |
| H | 6.768952 | 2.938521  | -3.407901 |
| C | 4.187003 | -1.368638 | -3.510151 |
| H | 3.389915 | -0.761210 | -3.093271 |
| C | 7.983925 | -3.765520 | 1.644208  |
| H | 8.617913 | -4.377272 | 2.278571  |
| C | 6.604673 | -3.731030 | 1.859145  |
| H | 6.161932 | -4.314211 | 2.660829  |
| C | 8.551539 | -3.001019 | 0.622454  |
| H | 9.625888 | -3.007857 | 0.469503  |
| C | 7.501808 | 4.553726  | -1.371862 |
| H | 7.568097 | 5.014125  | -2.353938 |
| C | 7.766441 | 4.642176  | 1.028162  |
| H | 8.047546 | 5.201151  | 1.915696  |
| C | 4.097276 | -1.828434 | -4.820912 |
| H | 3.241962 | -1.550039 | -5.429225 |
| C | 7.856311 | 5.256763  | -0.243683 |
| H | 8.207229 | 6.281066  | -0.324953 |
| C | 7.322989 | 3.344928  | 1.150370  |
| H | 7.251618 | 2.891027  | 2.131377  |
| C | 5.092165 | -2.666870 | -5.330351 |
| H | 5.019684 | -3.042585 | -6.346500 |
| P | 3.552456 | 0.748536  | 1.261110  |
| C | 3.429147 | 2.652656  | -0.749709 |
| H | 3.163171 | 1.801809  | -1.369842 |
| C | 5.160716 | 0.446944  | 2.136163  |
| C | 1.632395 | 1.870643  | 3.083918  |
| H | 1.924497 | 2.857067  | 2.743909  |
| C | 2.266661 | 0.730590  | 2.575904  |
| C | 3.663988 | 2.454160  | 0.617801  |
| C | 5.144225 | -0.135993 | 3.432807  |
| H | 4.203653 | -0.249292 | 3.957763  |
| C | 4.030434 | 3.544967  | 1.420228  |
| H | 4.259701 | 3.394539  | 2.471005  |
| C | 7.598384 | 0.203212  | 2.097368  |
| C | 6.375407 | 0.615649  | 1.467660  |
| C | 0.597548 | 1.744166  | 4.015924  |
| H | 0.108924 | 2.637265  | 4.395160  |
| C | 7.554379 | -0.417015 | 3.387455  |
| C | 6.302673 | -0.563255 | 4.033648  |
| H | 6.268925 | -1.013860 | 5.022016  |
| C | 1.843674 | -0.536586 | 3.020763  |
| H | 2.303686 | -1.429746 | 2.603226  |
| C | 3.896022 | 5.009867  | -0.499635 |
| H | 3.994764 | 6.000116  | -0.933313 |
| C | 3.548674 | 3.924477  | -1.306748 |
| H | 3.377214 | 4.067107  | -2.369333 |
| C | 4.134875 | 4.819303  | 0.863637  |
| H | 4.427974 | 5.657837  | 1.487298  |
| C | 8.759976 | -0.862957 | 3.991970  |
| H | 8.707703 | -1.336646 | 4.968526  |

|   |           |           |           |
|---|-----------|-----------|-----------|
| C | 10.021253 | -0.068555 | 2.091040  |
| H | 10.979009 | 0.066808  | 1.597430  |
| C | 0.822568  | -0.656755 | 3.959066  |
| H | 0.498726  | -1.637826 | 4.288070  |
| C | 9.970026  | -0.693626 | 3.359916  |
| H | 10.886671 | -1.033774 | 3.832068  |
| C | 8.868965  | 0.364529  | 1.475272  |
| H | 8.924957  | 0.831827  | 0.499665  |
| C | 0.187938  | 0.485909  | 4.456338  |
| H | -0.629519 | 0.384344  | 5.162980  |
| H | 0.229841  | -0.673301 | 0.985826  |
| C | 0.408084  | -0.771451 | -0.078901 |
| H | -0.034387 | -0.014628 | -0.721541 |
| C | 1.346996  | -1.622752 | -0.551471 |
| C | 2.299857  | -2.364387 | -1.004093 |
| C | 2.469459  | -3.602352 | -1.751987 |
| C | 1.471269  | -4.030923 | -2.648887 |
| C | 1.647829  | -5.190265 | -3.399756 |
| H | 0.870478  | -5.507955 | -4.088914 |
| C | 2.817976  | -5.943329 | -3.269027 |
| H | 2.955508  | -6.844871 | -3.858635 |
| H | 4.720256  | -6.112271 | -2.265891 |
| C | 3.808716  | -5.532068 | -2.374621 |
| C | 3.637454  | -4.371315 | -1.624011 |
| H | 4.411126  | -4.052479 | -0.936285 |
| H | 0.561092  | -3.450209 | -2.742144 |
| O | -2.927956 | -0.851676 | -1.353482 |

#### Int6-C\_R\_NiCu

|                                             |              |
|---------------------------------------------|--------------|
| Charge                                      | 1            |
| Electronic Energy, BS1 (a.u.)               | -5980.420425 |
| Thermal and entropic correction, BS1 (a.u.) | 1.478893     |
| Electronic Energy, BS2 (a.u.)               | -9902.779492 |
| Number of Imaginary Frequencies             | 0            |
| Imaginary frequencies (cm-1)                | None         |

#### Molecular Geometry in Cartesian Coordinates

|    |            |           |           |
|----|------------|-----------|-----------|
| Cu | -4.004014  | -0.662998 | 0.320666  |
| Fe | -7.496847  | 1.167094  | -1.122791 |
| P  | -5.975084  | -1.644662 | 0.160597  |
| C  | -7.217867  | -0.316729 | 0.261850  |
| C  | -7.000445  | 0.993408  | 0.854296  |
| C  | -8.222735  | 1.737431  | 0.743143  |
| H  | -8.357017  | 2.758466  | 1.068683  |
| C  | -9.181179  | 0.916105  | 0.094592  |
| H  | -10.184750 | 1.211182  | -0.178388 |
| C  | -8.573957  | -0.338831 | -0.196237 |
| H  | -9.035588  | -1.160949 | -0.723545 |
| C  | -5.943875  | 1.131280  | -2.490241 |
| H  | -5.016235  | 0.599280  | -2.331847 |
| C  | -6.208597  | 2.475326  | -2.089509 |
| H  | -5.519497  | 3.137310  | -1.585483 |
| C  | -7.560784  | 2.782655  | -2.423860 |
| H  | -8.072932  | 3.711434  | -2.212802 |
| C  | -8.133872  | 1.628350  | -3.038076 |
| H  | -9.157954  | 1.528690  | -3.370737 |
| C  | -7.136702  | 0.608601  | -3.079399 |

|   |           |           |           |
|---|-----------|-----------|-----------|
| H | -7.271340 | -0.401235 | -3.440114 |
| O | -5.903121 | 2.699485  | 2.087623  |
| C | -5.762758 | 1.560521  | 1.375077  |
| N | -4.560152 | 1.122016  | 1.212383  |
| C | -3.633572 | 2.035928  | 1.907654  |
| C | -4.570543 | 3.247580  | 2.307712  |
| H | -4.487352 | 3.449834  | 3.378145  |
| H | -3.290457 | 1.537121  | 2.822613  |
| C | -6.407836 | -2.776964 | 1.538606  |
| C | -7.514564 | -2.589678 | 2.376308  |
| H | -8.200899 | -1.767739 | 2.199251  |
| C | -7.735935 | -3.458079 | 3.449192  |
| H | -8.595278 | -3.305213 | 4.095580  |
| C | -6.861098 | -4.518234 | 3.686953  |
| H | -7.034932 | -5.190080 | 4.522149  |
| C | -5.756380 | -4.711789 | 2.851850  |
| H | -5.065863 | -5.527828 | 3.040888  |
| C | -5.526738 | -3.842300 | 1.789338  |
| H | -4.651244 | -3.975848 | 1.159160  |
| C | -6.414093 | -2.571293 | -1.356246 |
| C | -5.575298 | -2.432107 | -2.472145 |
| H | -4.684044 | -1.815352 | -2.396605 |
| C | -5.888104 | -3.079446 | -3.669101 |
| H | -5.237715 | -2.966151 | -4.531477 |
| C | -7.031607 | -3.877327 | -3.753803 |
| H | -7.273412 | -4.383103 | -4.683767 |
| C | -7.856560 | -4.039894 | -2.636463 |
| H | -8.735413 | -4.674875 | -2.697026 |
| C | -7.547621 | -3.394091 | -1.439239 |
| H | -8.177081 | -3.540186 | -0.565796 |
| C | -2.428380 | 2.376946  | 1.065703  |
| C | -1.159388 | 2.453883  | 1.645563  |
| C | -2.577783 | 2.674490  | -0.294632 |
| C | -0.054894 | 2.844624  | 0.883240  |
| C | -1.480343 | 3.068400  | -1.053821 |
| C | -0.214648 | 3.153430  | -0.467870 |
| H | -1.027368 | 2.196787  | 2.693373  |
| H | -3.556804 | 2.589412  | -0.750203 |
| H | 0.928972  | 2.898421  | 1.334157  |
| H | -1.602889 | 3.313854  | -2.103206 |
| H | 0.642276  | 3.442426  | -1.064658 |
| C | -4.395737 | 4.524956  | 1.518922  |
| C | -3.286676 | 5.338369  | 1.782516  |
| C | -5.288030 | 4.891946  | 0.507310  |
| C | -3.056105 | 6.483925  | 1.023944  |
| C | -5.058561 | 6.042952  | -0.250427 |
| C | -3.939549 | 6.837208  | 0.000328  |
| H | -2.587069 | 5.060240  | 2.565818  |
| H | -6.165846 | 4.284171  | 0.319997  |
| H | -2.187367 | 7.101137  | 1.231659  |
| H | -5.759001 | 6.319409  | -1.033298 |
| H | -3.760410 | 7.730598  | -0.590077 |
| H | 3.052377  | 3.949524  | -4.483340 |
| C | 2.451876  | 2.137911  | -3.478374 |
| C | 2.230967  | 3.276566  | -4.255304 |
| C | 0.947885  | 3.545467  | -4.738518 |
| H | 0.764363  | 4.430492  | -5.340313 |
| C | -0.104188 | 2.677883  | -4.443323 |
| H | -1.102306 | 2.895506  | -4.817575 |

|    |           |           |           |
|----|-----------|-----------|-----------|
| H  | -1.242122 | -0.061476 | -4.226206 |
| C  | -1.055618 | 0.620260  | -3.387530 |
| H  | -1.972107 | 1.180236  | -3.192366 |
| C  | 0.113828  | 1.535248  | -3.663283 |
| H  | 1.576320  | 0.402256  | -2.548893 |
| C  | 1.399516  | 1.267897  | -3.178544 |
| H  | 3.446500  | 1.928891  | -3.095250 |
| O  | -0.748232 | -0.204626 | -2.237738 |
| C  | -1.713865 | -0.572357 | -1.410708 |
| C  | -1.085534 | -2.888347 | -0.836386 |
| H  | -0.495587 | -2.917543 | -1.751389 |
| H  | -2.092386 | -3.266133 | -1.038638 |
| H  | -0.599267 | -3.543077 | -0.109259 |
| C  | -1.174956 | -1.451256 | -0.274015 |
| N  | -2.179422 | -1.425729 | 0.829605  |
| C  | -1.873593 | -2.090486 | 1.890149  |
| H  | -0.924124 | -2.630688 | 1.930647  |
| C  | -2.676664 | -2.241686 | 3.105229  |
| C  | -3.788611 | -1.443417 | 3.424617  |
| H  | -4.096031 | -0.654745 | 2.750684  |
| H  | -5.372437 | -1.056188 | 4.820142  |
| C  | -4.505931 | -1.669736 | 4.594604  |
| C  | -4.127698 | -2.694442 | 5.466844  |
| H  | -4.696444 | -2.873481 | 6.374117  |
| C  | -3.016490 | -3.487090 | 5.169473  |
| H  | -2.715029 | -4.281183 | 5.845518  |
| C  | -2.293261 | -3.256283 | 4.001837  |
| H  | -1.428570 | -3.873145 | 3.771463  |
| Ni | 3.289277  | -0.989098 | -0.323123 |
| P  | 5.345933  | -1.129606 | -1.097296 |
| C  | 5.916895  | -3.256214 | 0.590673  |
| H  | 4.835840  | -3.280156 | 0.706040  |
| C  | 6.122040  | 0.556984  | -0.936093 |
| C  | 6.510212  | -2.353764 | -3.428917 |
| H  | 7.282585  | -2.767507 | -2.790848 |
| C  | 5.505230  | -1.539455 | -2.889957 |
| C  | 6.487155  | -2.287033 | -0.247415 |
| C  | 6.153182  | 1.393589  | -2.087780 |
| H  | 5.910834  | 0.972537  | -3.056430 |
| C  | 7.882517  | -2.231144 | -0.380027 |
| H  | 8.336728  | -1.462585 | -0.997966 |
| C  | 6.837787  | 2.477936  | 0.412263  |
| C  | 6.457010  | 1.095141  | 0.309643  |
| C  | 6.512824  | -2.661526 | -4.791520 |
| H  | 7.292879  | -3.301424 | -5.194059 |
| C  | 6.834405  | 3.304579  | -0.757057 |
| C  | 6.486658  | 2.722778  | -2.000794 |
| H  | 6.500817  | 3.340855  | -2.895071 |
| C  | 4.501990  | -1.050858 | -3.743424 |
| H  | 3.689045  | -0.468549 | -3.324873 |
| C  | 8.116007  | -4.092786 | 1.144775  |
| H  | 8.749500  | -4.784560 | 1.691972  |
| C  | 6.727999  | -4.155700 | 1.283313  |
| H  | 6.278442  | -4.897031 | 1.937657  |
| C  | 8.691929  | -3.131056 | 0.311371  |
| H  | 9.771394  | -3.064538 | 0.220411  |
| C  | 7.186275  | 4.676164  | -0.648426 |
| H  | 7.174906  | 5.288058  | -1.546673 |
| C  | 7.557691  | 4.406058  | 1.721935  |

|   |           |           |           |
|---|-----------|-----------|-----------|
| H | 7.841018  | 4.836975  | 2.677772  |
| C | 4.513463  | -1.344435 | -5.104208 |
| H | 3.720204  | -0.966234 | -5.741363 |
| C | 7.543205  | 5.219349  | 0.564192  |
| H | 7.817104  | 6.267725  | 0.635812  |
| C | 7.211006  | 3.075755  | 1.649508  |
| H | 7.216932  | 2.469677  | 2.547269  |
| C | 5.520281  | -2.155830 | -5.631909 |
| H | 5.523406  | -2.403148 | -6.689439 |
| P | 3.643349  | 0.237485  | 1.460055  |
| C | 3.254178  | 2.521389  | -0.055412 |
| H | 2.979862  | 1.799787  | -0.816668 |
| C | 5.296925  | -0.071050 | 2.247986  |
| C | 1.682319  | 0.850645  | 3.488368  |
| H | 1.888814  | 1.902995  | 3.329992  |
| C | 2.414959  | -0.121574 | 2.796093  |
| C | 3.598369  | 2.056846  | 1.221386  |
| C | 5.378533  | -0.825944 | 3.450272  |
| H | 4.472229  | -1.075533 | 3.988633  |
| C | 3.964810  | 2.980288  | 2.211540  |
| H | 4.272588  | 2.630289  | 3.192827  |
| C | 7.741033  | -0.140009 | 2.089675  |
| C | 6.468542  | 0.272690  | 1.568596  |
| C | 0.669853  | 0.478164  | 4.379405  |
| H | 0.108892  | 1.246810  | 4.904193  |
| C | 7.795272  | -0.939084 | 3.276609  |
| C | 6.586200  | -1.255359 | 3.942409  |
| H | 6.625613  | -1.841716 | 4.856787  |
| C | 2.116976  | -1.477948 | 3.027324  |
| H | 2.651093  | -2.238499 | 2.462955  |
| C | 3.639403  | 4.799095  | 0.648071  |
| H | 3.672489  | 5.861100  | 0.424620  |
| C | 3.282304  | 3.884569  | -0.344989 |
| H | 3.036290  | 4.224062  | -1.347027 |
| C | 3.973832  | 4.345921  | 1.927026  |
| H | 4.272065  | 5.054436  | 2.693613  |
| C | 9.052044  | -1.390799 | 3.760461  |
| H | 9.073747  | -2.003102 | 4.658090  |
| C | 10.172934 | -0.254063 | 1.947771  |
| H | 11.096389 | 0.010797  | 1.441228  |
| C | 1.124398  | -1.848301 | 3.932455  |
| H | 0.916285  | -2.900562 | 4.104780  |
| C | 10.218678 | -1.058576 | 3.111666  |
| H | 11.174704 | -1.407120 | 3.490687  |
| C | 8.969474  | 0.191555  | 1.450196  |
| H | 8.950356  | 0.797693  | 0.552538  |
| C | 0.385709  | -0.868655 | 4.604822  |
| H | -0.405249 | -1.157922 | 5.289904  |
| H | 0.331302  | -1.195669 | 1.258627  |
| C | 0.199238  | -0.888286 | 0.220008  |
| H | 0.126488  | 0.203510  | 0.263247  |
| C | 1.428130  | -1.274035 | -0.511253 |
| C | 2.053776  | -1.942099 | -1.418231 |
| C | 2.081037  | -2.782291 | -2.599892 |
| C | 1.235508  | -2.538042 | -3.699317 |
| C | 1.334815  | -3.306218 | -4.859353 |
| H | 0.682024  | -3.095030 | -5.702391 |
| C | 2.272192  | -4.337377 | -4.943397 |
| H | 2.353089  | -4.930849 | -5.849183 |



|   |           |           |           |
|---|-----------|-----------|-----------|
| H | 3.855700  | -5.384569 | -3.918263 |
| C | 3.113545  | -4.594104 | -3.856231 |
| C | 3.024722  | -3.822026 | -2.702314 |
| H | 3.702843  | -3.989118 | -1.871160 |
| H | 0.521208  | -1.725526 | -3.640456 |
| O | -2.893930 | -0.276238 | -1.570297 |

#### Int4-A\_Cu

|                                             |               |
|---------------------------------------------|---------------|
| Charge                                      | 0             |
| Electronic Energy, BS1 (a.u.)               | -3387.941107  |
| Thermal and entropic correction, BS1 (a.u.) | 0.831300      |
| Electronic Energy, BS2 (a.u.)               | -5972.084308  |
| Number of Imaginary Frequencies             | 2             |
| Imaginary frequencies (cm-1)                | -13.7i, -7.7i |

#### Molecular Geometry in Cartesian Coordinates

|    |           |           |           |
|----|-----------|-----------|-----------|
| Cu | 0.377490  | -1.001874 | -0.177502 |
| Fe | 3.101490  | 2.552010  | -0.108504 |
| P  | 2.505940  | -0.817247 | -0.768621 |
| C  | 2.800766  | 0.904288  | -1.295138 |
| C  | 1.770958  | 1.904982  | -1.521026 |
| C  | 2.412358  | 3.099139  | -1.989914 |
| H  | 1.909493  | 4.030382  | -2.208059 |
| C  | 3.810418  | 2.854280  | -2.054453 |
| H  | 4.566971  | 3.577571  | -2.327564 |
| C  | 4.050808  | 1.515720  | -1.634404 |
| H  | 5.018837  | 1.042928  | -1.550363 |
| C  | 2.573940  | 2.131836  | 1.843131  |
| H  | 1.976411  | 1.277575  | 2.129727  |
| C  | 2.079170  | 3.418627  | 1.467328  |
| H  | 1.040770  | 3.715232  | 1.413948  |
| C  | 3.193761  | 4.232588  | 1.103079  |
| H  | 3.143878  | 5.247799  | 0.731981  |
| C  | 4.379347  | 3.450548  | 1.255985  |
| H  | 5.385983  | 3.770008  | 1.020366  |
| C  | 3.997580  | 2.153573  | 1.713458  |
| H  | 4.659925  | 1.315888  | 1.881661  |
| O  | -0.405696 | 2.825007  | -1.744348 |
| C  | 0.339348  | 1.817481  | -1.239666 |
| N  | -0.278251 | 0.917504  | -0.559328 |
| C  | -1.716401 | 1.251056  | -0.525129 |
| C  | -1.786141 | 2.619093  | -1.314287 |
| H  | -2.377197 | 2.471797  | -2.220254 |
| H  | -2.244036 | 0.488292  | -1.100949 |
| C  | 2.963823  | -1.808020 | -2.246559 |
| C  | 2.927597  | -1.267704 | -3.540554 |
| H  | 2.716529  | -0.212621 | -3.686374 |
| C  | 3.161775  | -2.083802 | -4.650669 |
| H  | 3.135040  | -1.653051 | -5.647906 |
| C  | 3.432826  | -3.443360 | -4.480873 |
| H  | 3.616701  | -4.074948 | -5.345214 |
| C  | 3.466050  | -3.989087 | -3.193365 |
| H  | 3.675366  | -5.046092 | -3.053264 |
| C  | 3.227487  | -3.179571 | -2.082943 |
| H  | 3.251009  | -3.613384 | -1.086525 |
| C  | 3.822601  | -1.170015 | 0.457856  |
| C  | 3.435291  | -1.302941 | 1.799078  |

|   |           |           |           |
|---|-----------|-----------|-----------|
| H | 2.384319  | -1.237448 | 2.061526  |
| C | 4.393639  | -1.506171 | 2.794535  |
| H | 4.080433  | -1.601609 | 3.830040  |
| C | 5.745654  | -1.588446 | 2.453059  |
| H | 6.493420  | -1.747089 | 3.224908  |
| C | 6.136843  | -1.479246 | 1.113597  |
| H | 7.186667  | -1.557058 | 0.845218  |
| C | 5.180604  | -1.275137 | 0.117925  |
| H | 5.489671  | -1.206865 | -0.920737 |
| C | -2.234181 | 1.225224  | 0.896984  |
| C | -3.268674 | 0.353528  | 1.249762  |
| C | -1.651943 | 2.027541  | 1.889766  |
| C | -3.734334 | 0.300905  | 2.568829  |
| C | -2.113939 | 1.980255  | 3.203481  |
| C | -3.160822 | 1.116643  | 3.545113  |
| H | -3.699630 | -0.309183 | 0.505380  |
| H | -0.833049 | 2.686891  | 1.628283  |
| H | -4.532993 | -0.393225 | 2.810277  |
| H | -1.656069 | 2.612142  | 3.959765  |
| H | -3.519865 | 1.075382  | 4.569971  |
| C | -2.285622 | 3.833047  | -0.569286 |
| C | -3.658680 | 3.943111  | -0.311876 |
| C | -1.418872 | 4.825252  | -0.098468 |
| C | -4.155146 | 5.020676  | 0.420996  |
| C | -1.917820 | 5.906991  | 0.632295  |
| C | -3.285082 | 6.006340  | 0.897668  |
| H | -4.333684 | 3.172197  | -0.672311 |
| H | -0.355674 | 4.748216  | -0.299132 |
| H | -5.220704 | 5.090463  | 0.620877  |
| H | -1.234997 | 6.670318  | 0.995574  |
| H | -3.671567 | 6.845518  | 1.469108  |
| H | -5.533659 | 2.356442  | -2.725783 |
| C | -5.143660 | 0.350334  | -2.026075 |
| C | -5.008618 | 1.423681  | -2.911691 |
| C | -4.185179 | 1.293451  | -4.034276 |
| H | -4.064376 | 2.125283  | -4.722901 |
| C | -3.505347 | 0.095260  | -4.266391 |
| H | -2.854695 | 0.000899  | -5.132647 |
| H | -2.059441 | -2.124965 | -4.301515 |
| C | -2.956475 | -2.291994 | -3.699082 |
| H | -3.619358 | -2.975707 | -4.235927 |
| C | -3.655092 | -0.986864 | -3.389770 |
| H | -4.574806 | -1.672612 | -1.549379 |
| C | -4.478325 | -0.856275 | -2.262946 |
| H | -5.768121 | 0.447766  | -1.142218 |
| O | -2.604122 | -3.034488 | -2.502591 |
| C | -1.610122 | -2.540900 | -1.765334 |
| C | -0.427437 | -4.559645 | -0.950711 |
| H | -0.256447 | -5.215102 | -0.092248 |
| H | 0.537570  | -4.180394 | -1.303271 |
| H | -0.891679 | -5.145145 | -1.749378 |
| C | -1.345573 | -3.394298 | -0.538436 |
| N | -0.704125 | -2.566988 | 0.502651  |
| C | -0.759111 | -3.046177 | 1.695278  |
| H | -1.237362 | -4.010014 | 1.872546  |
| C | -0.188700 | -2.382801 | 2.873184  |
| C | -0.094719 | -0.984277 | 2.969520  |
| H | -0.505434 | -0.365501 | 2.180355  |
| H | 0.536348  | 0.686562  | 4.161393  |

|   |           |           |           |
|---|-----------|-----------|-----------|
| C | 0.484164  | -0.395517 | 4.091898  |
| C | 0.979869  | -1.194327 | 5.128107  |
| H | 1.434929  | -0.733252 | 6.000106  |
| C | 0.867927  | -2.586266 | 5.050601  |
| H | 1.237227  | -3.208696 | 5.860362  |
| C | 0.271633  | -3.177508 | 3.936583  |
| H | 0.174845  | -4.258564 | 3.877851  |
| O | -0.962370 | -1.552074 | -2.078897 |
| H | -2.318865 | -3.743002 | -0.178014 |
| O | -4.286014 | -2.867965 | 0.223949  |
| C | -4.586724 | -2.808456 | 1.439334  |
| O | -3.605133 | -3.433375 | 2.258486  |
| O | -5.575321 | -2.309548 | 2.009797  |
| H | -3.726541 | -2.335985 | 4.039387  |
| C | -3.821732 | -3.361330 | 3.660470  |
| H | -4.811748 | -3.737964 | 3.941936  |
| H | -3.050139 | -3.981224 | 4.129483  |

#### TS45-A\_Cu

|                                             |              |
|---------------------------------------------|--------------|
| Charge                                      | 0            |
| Electronic Energy, BS1 (a.u.)               | -3387.925948 |
| Thermal and entropic correction, BS1 (a.u.) | 0.825241     |
| Electronic Energy, BS2 (a.u.)               | -5972.064893 |
| Number of Imaginary Frequencies             | 1            |
| Imaginary frequencies (cm-1)                | -1415.1i     |

#### Molecular Geometry in Cartesian Coordinates

|    |           |           |           |
|----|-----------|-----------|-----------|
| Cu | 0.284668  | -0.912469 | 0.138777  |
| Fe | 2.978618  | 2.538905  | -0.514027 |
| P  | 2.350521  | -0.879144 | -0.683638 |
| C  | 2.627473  | 0.748482  | -1.463738 |
| C  | 1.583800  | 1.712136  | -1.769131 |
| C  | 2.194253  | 2.836067  | -2.418406 |
| H  | 1.674070  | 3.729133  | -2.734186 |
| C  | 3.589873  | 2.587740  | -2.511861 |
| H  | 4.328646  | 3.270219  | -2.910255 |
| C  | 3.857746  | 1.314911  | -1.930957 |
| H  | 4.831947  | 0.859994  | -1.823000 |
| C  | 2.676213  | 2.302614  | 1.514866  |
| H  | 2.189004  | 1.441459  | 1.948706  |
| C  | 2.029477  | 3.492527  | 1.062354  |
| H  | 0.967908  | 3.692940  | 1.096036  |
| C  | 3.021554  | 4.349908  | 0.498011  |
| H  | 2.840949  | 5.309328  | 0.031301  |
| C  | 4.285218  | 3.691748  | 0.606319  |
| H  | 5.230063  | 4.065379  | 0.234071  |
| C  | 4.072591  | 2.427184  | 1.234640  |
| H  | 4.823282  | 1.671316  | 1.419690  |
| O  | -0.627503 | 2.512599  | -2.108307 |
| C  | 0.164738  | 1.655619  | -1.423202 |
| N  | -0.405573 | 0.911374  | -0.543048 |
| C  | -1.854081 | 1.176129  | -0.575720 |
| C  | -1.967874 | 2.425687  | -1.536275 |
| H  | -2.649433 | 2.194112  | -2.355935 |
| H  | -2.330947 | 0.317510  | -1.056697 |
| C  | 2.493713  | -2.080775 | -2.071719 |
| C  | 3.065341  | -1.790570 | -3.318295 |

|   |           |           |           |
|---|-----------|-----------|-----------|
| H | 3.478509  | -0.806724 | -3.515406 |
| C | 3.098564  | -2.764343 | -4.320990 |
| H | 3.540948  | -2.528038 | -5.284877 |
| C | 2.565900  | -4.033885 | -4.086943 |
| H | 2.590691  | -4.787426 | -4.869212 |
| C | 1.992476  | -4.330295 | -2.846029 |
| H | 1.566026  | -5.312369 | -2.661351 |
| C | 1.949296  | -3.357347 | -1.848337 |
| H | 1.473056  | -3.575397 | -0.896141 |
| C | 3.874492  | -1.153370 | 0.306908  |
| C | 3.770706  | -1.064085 | 1.703043  |
| H | 2.805360  | -0.873398 | 2.160005  |
| C | 4.902929  | -1.220094 | 2.506094  |
| H | 4.807294  | -1.147377 | 3.585349  |
| C | 6.145169  | -1.476824 | 1.920749  |
| H | 7.026036  | -1.600974 | 2.544406  |
| C | 6.251503  | -1.590351 | 0.530252  |
| H | 7.213314  | -1.805876 | 0.073161  |
| C | 5.121516  | -1.434561 | -0.274086 |
| H | 5.208391  | -1.540817 | -1.351463 |
| C | -2.427726 | 1.340263  | 0.813176  |
| C | -3.666367 | 0.776326  | 1.130353  |
| C | -1.736906 | 2.064182  | 1.794862  |
| C | -4.216253 | 0.944037  | 2.405066  |
| C | -2.282879 | 2.235652  | 3.066259  |
| C | -3.528518 | 1.678057  | 3.373466  |
| H | -4.187533 | 0.177115  | 0.390873  |
| H | -0.764818 | 2.481842  | 1.558811  |
| H | -5.161715 | 0.467856  | 2.641875  |
| H | -1.736492 | 2.799960  | 3.817167  |
| H | -3.953827 | 1.805992  | 4.365167  |
| C | -2.344708 | 3.737277  | -0.893274 |
| C | -3.698290 | 4.004854  | -0.650508 |
| C | -1.379157 | 4.661754  | -0.479760 |
| C | -4.079409 | 5.170382  | 0.014398  |
| C | -1.761463 | 5.832003  | 0.180922  |
| C | -3.110863 | 6.087103  | 0.434955  |
| H | -4.451448 | 3.289517  | -0.970269 |
| H | -0.330349 | 4.467887  | -0.676648 |
| H | -5.131689 | 5.363913  | 0.202769  |
| H | -1.002833 | 6.542258  | 0.498507  |
| H | -3.407415 | 6.995060  | 0.952456  |
| H | -5.234099 | 1.610570  | -3.547348 |
| C | -4.959384 | -0.242681 | -2.471253 |
| C | -4.681663 | 0.676850  | -3.487553 |
| C | -3.683542 | 0.388924  | -4.423533 |
| H | -3.452821 | 1.100799  | -5.211403 |
| C | -2.970247 | -0.809481 | -4.340649 |
| H | -2.182451 | -1.021452 | -5.059721 |
| H | -1.513262 | -2.942910 | -3.753688 |
| C | -2.490832 | -3.044899 | -3.274045 |
| H | -3.045794 | -3.840542 | -3.780052 |
| C | -3.252809 | -1.737476 | -3.330985 |
| H | -4.459159 | -2.140471 | -1.587132 |
| C | -4.254734 | -1.446984 | -2.395940 |
| H | -5.727047 | -0.024804 | -1.733654 |
| O | -2.327155 | -3.545085 | -1.930039 |
| C | -1.524919 | -2.803929 | -1.122395 |
| C | -1.828645 | -4.661552 | 0.614443  |

|   |           |           |           |
|---|-----------|-----------|-----------|
| H | -2.322155 | -4.769749 | 1.585734  |
| H | -0.888063 | -5.230413 | 0.645220  |
| H | -2.479184 | -5.112755 | -0.135716 |
| C | -1.595817 | -3.193327 | 0.283781  |
| N | -0.688644 | -2.448065 | 1.094779  |
| C | -0.367631 | -2.850847 | 2.280206  |
| H | -0.685397 | -3.825488 | 2.651334  |
| C | 0.414501  | -2.028578 | 3.211913  |
| C | 0.296003  | -0.625716 | 3.231794  |
| H | -0.415145 | -0.141815 | 2.571058  |
| H | 0.941556  | 1.215870  | 4.133216  |
| C | 1.053406  | 0.135463  | 4.121697  |
| C | 1.942514  | -0.488120 | 5.003769  |
| H | 2.535051  | 0.106673  | 5.693063  |
| C | 2.049499  | -1.882924 | 5.007760  |
| H | 2.729908  | -2.374340 | 5.697551  |
| C | 1.281283  | -2.647782 | 4.129388  |
| H | 1.364012  | -3.731833 | 4.136637  |
| O | -0.907034 | -1.833220 | -1.575613 |
| H | -2.873421 | -2.701720 | 0.565073  |
| O | -4.067876 | -2.459617 | 0.749251  |
| C | -4.405073 | -2.309944 | 1.991327  |
| O | -3.330644 | -2.458127 | 2.834999  |
| O | -5.530123 | -2.069590 | 2.417438  |
| H | -3.938103 | -1.240032 | 4.420586  |
| C | -3.601633 | -2.262663 | 4.225826  |
| H | -4.362221 | -2.962994 | 4.585256  |
| H | -2.656214 | -2.441466 | 4.741813  |

#### TS5-A\_Cu

|                                             |              |
|---------------------------------------------|--------------|
| Charge                                      | 0            |
| Electronic Energy, BS1 (a.u.)               | -3387.934203 |
| Thermal and entropic correction, BS1 (a.u.) | 0.830005     |
| Electronic Energy, BS2 (a.u.)               | -5972.073187 |
| Number of Imaginary Frequencies             | 0            |
| Imaginary frequencies (cm-1)                | None         |

#### Molecular Geometry in Cartesian Coordinates

|    |          |           |           |
|----|----------|-----------|-----------|
| Cu | 0.312022 | -0.930179 | 0.116290  |
| Fe | 2.972002 | 2.535007  | -0.569858 |
| P  | 2.380979 | -0.893520 | -0.699933 |
| C  | 2.661248 | 0.725418  | -1.496488 |
| C  | 1.612448 | 1.670142  | -1.838058 |
| C  | 2.221308 | 2.791241  | -2.493930 |
| H  | 1.696294 | 3.672020  | -2.835255 |
| C  | 3.621706 | 2.559479  | -2.555344 |
| H  | 4.359769 | 3.244753  | -2.950281 |
| C  | 3.893530 | 1.299357  | -1.948574 |
| H  | 4.870772 | 0.858285  | -1.813615 |
| C  | 2.682364 | 2.300865  | 1.460898  |
| H  | 2.239711 | 1.420832  | 1.902924  |
| C  | 1.975161 | 3.451839  | 0.999382  |
| H  | 0.904450 | 3.596222  | 1.032497  |
| C  | 2.921995 | 4.354047  | 0.426714  |
| H  | 2.692624 | 5.299298  | -0.047478 |
| C  | 4.217948 | 3.761895  | 0.538960  |
| H  | 5.142210 | 4.180423  | 0.162788  |

|   |           |           |           |
|---|-----------|-----------|-----------|
| C | 4.070230  | 2.493085  | 1.177976  |
| H | 4.857781  | 1.776844  | 1.368370  |
| O | -0.604233 | 2.399372  | -2.277831 |
| C | 0.186735  | 1.597863  | -1.523801 |
| N | -0.392250 | 0.890150  | -0.619230 |
| C | -1.844876 | 1.113210  | -0.723521 |
| C | -1.947142 | 2.341486  | -1.710803 |
| H | -2.630930 | 2.103693  | -2.526600 |
| H | -2.270961 | 0.230280  | -1.209432 |
| C | 2.540486  | -2.105108 | -2.078465 |
| C | 3.190739  | -1.846529 | -3.293689 |
| H | 3.653073  | -0.881120 | -3.472254 |
| C | 3.240425  | -2.827657 | -4.288036 |
| H | 3.744897  | -2.616417 | -5.226966 |
| C | 2.643722  | -4.073079 | -4.077824 |
| H | 2.681468  | -4.832520 | -4.853905 |
| C | 1.989365  | -4.336667 | -2.870372 |
| H | 1.511898  | -5.298608 | -2.705497 |
| C | 1.931260  | -3.356190 | -1.880176 |
| H | 1.392403  | -3.546933 | -0.956190 |
| C | 3.901075  | -1.147908 | 0.304642  |
| C | 3.786721  | -1.039150 | 1.698785  |
| H | 2.816527  | -0.850433 | 2.146286  |
| C | 4.913414  | -1.176684 | 2.513042  |
| H | 4.808098  | -1.088801 | 3.590317  |
| C | 6.161651  | -1.434951 | 1.941441  |
| H | 7.038329  | -1.544845 | 2.573661  |
| C | 6.279069  | -1.568585 | 0.553689  |
| H | 7.245477  | -1.785714 | 0.107089  |
| C | 5.154559  | -1.430838 | -0.261710 |
| H | 5.251893  | -1.553056 | -1.336403 |
| C | -2.504093 | 1.305641  | 0.621711  |
| C | -3.823386 | 0.883006  | 0.814141  |
| C | -1.836715 | 1.953353  | 1.668955  |
| C | -4.474485 | 1.121419  | 2.026974  |
| C | -2.481248 | 2.186006  | 2.884269  |
| C | -3.805829 | 1.776641  | 3.064008  |
| H | -4.337246 | 0.359656  | 0.014181  |
| H | -0.807742 | 2.265030  | 1.528064  |
| H | -5.491602 | 0.770577  | 2.168728  |
| H | -1.950700 | 2.686943  | 3.689375  |
| H | -4.310622 | 1.959751  | 4.008515  |
| C | -2.304405 | 3.669403  | -1.088326 |
| C | -3.654378 | 3.977296  | -0.874558 |
| C | -1.321997 | 4.569634  | -0.660473 |
| C | -4.015676 | 5.156944  | -0.223492 |
| C | -1.683985 | 5.753909  | -0.013532 |
| C | -3.030403 | 6.048289  | 0.212257  |
| H | -4.421053 | 3.282238  | -1.206084 |
| H | -0.275105 | 4.347645  | -0.836431 |
| H | -5.065700 | 5.381235  | -0.057964 |
| H | -0.911792 | 6.444317  | 0.315004  |
| H | -3.311483 | 6.967128  | 0.719091  |
| H | -5.621685 | 1.199621  | -3.297916 |
| C | -5.270270 | -0.694753 | -2.320730 |
| C | -4.994697 | 0.313502  | -3.249879 |
| C | -3.904681 | 0.174851  | -4.114567 |
| H | -3.677813 | 0.955832  | -4.835343 |
| C | -3.095998 | -0.962750 | -4.046360 |

|   |           |           |           |
|---|-----------|-----------|-----------|
| H | -2.237510 | -1.057702 | -4.706769 |
| H | -1.560526 | -3.055838 | -3.579257 |
| C | -2.513832 | -3.224609 | -3.070159 |
| H | -3.023792 | -4.063341 | -3.554632 |
| C | -3.372869 | -1.979059 | -3.124248 |
| H | -4.670587 | -2.604480 | -1.523710 |
| C | -4.466645 | -1.835664 | -2.261358 |
| H | -6.111837 | -0.594443 | -1.640583 |
| O | -2.284166 | -3.690839 | -1.728676 |
| C | -1.482057 | -2.881970 | -0.959457 |
| C | -1.856248 | -4.612163 | 0.905474  |
| H | -2.378182 | -4.516223 | 1.866996  |
| H | -1.025755 | -5.317895 | 1.065634  |
| H | -2.546127 | -5.064001 | 0.191912  |
| C | -1.374030 | -3.275207 | 0.403743  |
| N | -0.566256 | -2.466781 | 1.187036  |
| C | -0.211394 | -2.808992 | 2.397816  |
| H | -0.457344 | -3.794756 | 2.793219  |
| C | 0.502602  | -1.912516 | 3.302375  |
| C | 0.362130  | -0.509694 | 3.235990  |
| H | -0.326250 | -0.080664 | 2.516313  |
| H | 0.932075  | 1.397062  | 4.048065  |
| C | 1.062885  | 0.320133  | 4.110695  |
| C | 1.918044  | -0.225495 | 5.074350  |
| H | 2.464964  | 0.423015  | 5.752765  |
| C | 2.044597  | -1.616313 | 5.170022  |
| H | 2.696825  | -2.052079 | 5.922249  |
| C | 1.337440  | -2.449095 | 4.303843  |
| H | 1.443460  | -3.528522 | 4.382968  |
| O | -0.945228 | -1.878657 | -1.481266 |
| H | -3.169933 | -2.492891 | 0.757513  |
| O | -4.140126 | -2.391794 | 0.957770  |
| C | -4.330942 | -2.094406 | 2.242043  |
| O | -3.159264 | -1.968385 | 2.891582  |
| O | -5.428789 | -1.967336 | 2.742619  |
| H | -3.786955 | -0.709399 | 4.435694  |
| C | -3.245486 | -1.646507 | 4.290649  |
| H | -3.745496 | -2.449968 | 4.839147  |
| H | -2.214206 | -1.541176 | 4.626392  |

#### Int6-A\_S\_NiCu

|                                             |              |
|---------------------------------------------|--------------|
| Charge                                      | 1            |
| Electronic Energy, BS1 (a.u.)               | -5980.381649 |
| Thermal and entropic correction, BS1 (a.u.) | 1.473653     |
| Electronic Energy, BS2 (a.u.)               | -9902.746014 |
| Number of Imaginary Frequencies             | 0            |
| Imaginary frequencies (cm-1)                | None         |

#### Molecular Geometry in Cartesian Coordinates

|    |          |           |           |
|----|----------|-----------|-----------|
| Cu | 3.352627 | 0.347542  | -0.431055 |
| Fe | 6.904098 | -1.654043 | 1.198937  |
| P  | 5.485920 | 0.618649  | -1.026049 |
| C  | 6.523837 | 0.212079  | 0.417827  |
| C  | 6.029659 | 0.104454  | 1.777785  |
| C  | 7.145572 | -0.169768 | 2.637474  |
| H  | 7.081596 | -0.328563 | 3.703991  |
| C  | 8.311939 | -0.248346 | 1.831950  |

|   |           |           |           |
|---|-----------|-----------|-----------|
| H | 9.305555  | -0.493894 | 2.180381  |
| C | 7.936101  | -0.015855 | 0.477359  |
| H | 8.593358  | -0.053600 | -0.379383 |
| C | 5.685735  | -3.047581 | 0.279872  |
| H | 4.822320  | -2.792405 | -0.316344 |
| C | 5.694005  | -3.261953 | 1.690734  |
| H | 4.839940  | -3.198112 | 2.349527  |
| C | 7.038631  | -3.519254 | 2.093595  |
| H | 7.379646  | -3.681167 | 3.107110  |
| C | 7.862439  | -3.469135 | 0.928144  |
| H | 8.937589  | -3.583327 | 0.906187  |
| C | 7.027595  | -3.178260 | -0.191874 |
| H | 7.352411  | -3.025038 | -1.211277 |
| O | 4.517950  | 0.418974  | 3.572596  |
| C | 4.649780  | 0.142781  | 2.251340  |
| N | 3.565205  | -0.084592 | 1.591685  |
| C | 2.431089  | 0.089364  | 2.512074  |
| C | 3.131779  | 0.179187  | 3.930154  |
| H | 2.781764  | 1.060559  | 4.472501  |
| H | 1.962729  | 1.048380  | 2.265972  |
| C | 5.926463  | 2.350019  | -1.449489 |
| C | 7.139470  | 2.969181  | -1.114414 |
| H | 7.879005  | 2.439477  | -0.522380 |
| C | 7.398931  | 4.275104  | -1.534543 |
| H | 8.341154  | 4.747917  | -1.272242 |
| C | 6.449644  | 4.973365  | -2.283212 |
| H | 6.649479  | 5.992801  | -2.598517 |
| C | 5.231374  | 4.370643  | -2.601643 |
| H | 4.475919  | 4.923946  | -3.150664 |
| C | 4.967861  | 3.067420  | -2.184657 |
| H | 4.010354  | 2.605758  | -2.411465 |
| C | 6.236022  | -0.377643 | -2.375338 |
| C | 5.528668  | -1.502859 | -2.819088 |
| H | 4.552686  | -1.720305 | -2.402444 |
| C | 6.069376  | -2.339850 | -3.796592 |
| H | 5.503724  | -3.205674 | -4.127112 |
| C | 7.321326  | -2.052746 | -4.344208 |
| H | 7.745733  | -2.701184 | -5.105220 |
| C | 8.021420  | -0.915986 | -3.926283 |
| H | 8.985655  | -0.678879 | -4.366645 |
| C | 7.479463  | -0.076761 | -2.952227 |
| H | 8.015268  | 0.819928  | -2.654667 |
| C | 1.402569  | -1.011475 | 2.407387  |
| C | 0.073321  | -0.748180 | 2.754601  |
| C | 1.772078  | -2.321956 | 2.085455  |
| C | -0.863731 | -1.782526 | 2.822684  |
| C | 0.839464  | -3.356709 | 2.147824  |
| C | -0.476733 | -3.092619 | 2.533360  |
| H | -0.218191 | 0.270333  | 2.996699  |
| H | 2.795581  | -2.520680 | 1.789799  |
| H | -1.891497 | -1.575709 | 3.107518  |
| H | 1.144274  | -4.372127 | 1.911794  |
| H | -1.199525 | -3.899290 | 2.603634  |
| C | 3.029543  | -1.051753 | 4.801350  |
| C | 1.886949  | -1.244987 | 5.586334  |
| C | 4.025367  | -2.034257 | 4.794040  |
| C | 1.727006  | -2.414492 | 6.327841  |
| C | 3.867911  | -3.203711 | 5.540251  |
| C | 2.715787  | -3.401057 | 6.302616  |



|    |           |           |           |
|----|-----------|-----------|-----------|
| H  | 1.112002  | -0.483280 | 5.604256  |
| H  | 4.928668  | -1.878399 | 4.215249  |
| H  | 0.833654  | -2.554027 | 6.929428  |
| H  | 4.649003  | -3.958530 | 5.527659  |
| H  | 2.593294  | -4.311050 | 6.882202  |
| H  | 5.916186  | 7.313188  | 0.142413  |
| C  | 3.861344  | 7.299042  | -0.509771 |
| C  | 4.975122  | 6.770925  | 0.145466  |
| C  | 4.879876  | 5.539121  | 0.796912  |
| H  | 5.750782  | 5.115130  | 1.287440  |
| C  | 3.674005  | 4.840175  | 0.800802  |
| H  | 3.598267  | 3.870680  | 1.280165  |
| H  | 0.392531  | 5.333535  | 0.096246  |
| C  | 1.226879  | 4.633638  | 0.173695  |
| H  | 1.117720  | 4.046894  | 1.089232  |
| C  | 2.545508  | 5.368925  | 0.157966  |
| H  | 1.782896  | 7.014046  | -1.004591 |
| C  | 2.653692  | 6.598790  | -0.501984 |
| H  | 3.930439  | 8.256362  | -1.018675 |
| O  | 1.050958  | 3.766227  | -0.970005 |
| C  | 1.652673  | 2.539914  | -0.902447 |
| C  | 0.768294  | 2.212617  | -3.290607 |
| H  | 0.491005  | 3.261811  | -3.196017 |
| H  | -0.149970 | 1.627109  | -3.466068 |
| H  | 1.385213  | 2.098270  | -4.193384 |
| C  | 1.490969  | 1.739070  | -2.065357 |
| N  | 1.920166  | 0.448851  | -1.941664 |
| C  | 1.721784  | -0.455525 | -2.875178 |
| H  | 1.309707  | -0.176778 | -3.844994 |
| C  | 2.033496  | -1.862712 | -2.683808 |
| C  | 2.126530  | -2.447456 | -1.401198 |
| H  | 1.928054  | -1.838287 | -0.526701 |
| H  | 2.476137  | -4.225891 | -0.252717 |
| C  | 2.416125  | -3.801582 | -1.251103 |
| C  | 2.612578  | -4.617088 | -2.371446 |
| H  | 2.840834  | -5.671717 | -2.251444 |
| C  | 2.500740  | -4.056115 | -3.648600 |
| H  | 2.639735  | -4.678269 | -4.528592 |
| C  | 2.210050  | -2.702449 | -3.802826 |
| H  | 2.125635  | -2.277960 | -4.799743 |
| Ni | -2.935742 | -0.031276 | -0.839531 |
| P  | -4.612944 | -1.441524 | -0.646004 |
| C  | -5.892907 | -0.436693 | -2.901436 |
| H  | -4.988563 | 0.154059  | -3.015041 |
| C  | -5.317737 | -1.182538 | 1.051618  |
| C  | -4.659538 | -4.198192 | -1.400698 |
| H  | -5.569838 | -3.995640 | -1.952164 |
| C  | -4.022421 | -3.180747 | -0.680130 |
| C  | -6.006010 | -1.317473 | -1.816550 |
| C  | -4.898987 | -2.041621 | 2.105621  |
| H  | -4.309016 | -2.920564 | 1.878967  |
| C  | -7.193765 | -2.042604 | -1.636591 |
| H  | -7.306740 | -2.697936 | -0.778194 |
| C  | -6.487918 | 0.205228  | 2.698763  |
| C  | -6.099197 | -0.061738 | 1.342155  |
| C  | -4.105986 | -5.479984 | -1.442393 |
| H  | -4.602352 | -6.257152 | -2.015404 |
| C  | -6.029875 | -0.656075 | 3.747523  |
| C  | -5.234655 | -1.778977 | 3.411205  |

|   |            |           |           |
|---|------------|-----------|-----------|
| H | -4.901729  | -2.445700 | 4.202298  |
| C | -2.812317  | -3.462896 | -0.021976 |
| H | -2.274280  | -2.670785 | 0.490113  |
| C | -8.121533  | -1.025127 | -3.624460 |
| H | -8.946301  | -0.906724 | -4.320262 |
| C | -6.946295  | -0.292235 | -3.802801 |
| H | -6.855177  | 0.400937  | -4.633349 |
| C | -8.243884  | -1.899302 | -2.541911 |
| H | -9.164985  | -2.452602 | -2.389964 |
| C | -6.388044  | -0.374256 | 5.092604  |
| H | -6.029167  | -1.035967 | 5.876214  |
| C | -7.644847  | 1.556607  | 4.365294  |
| H | -8.272013  | 2.408185  | 4.611377  |
| C | -2.270717  | -4.744817 | -0.056747 |
| H | -1.325830  | -4.938706 | 0.440260  |
| C | -7.180685  | 0.707830  | 5.398303  |
| H | -7.454906  | 0.911625  | 6.428855  |
| C | -7.304753  | 1.316191  | 3.053387  |
| H | -7.660006  | 1.981749  | 2.276209  |
| C | -2.918488  | -5.758324 | -0.766856 |
| H | -2.487792  | -6.754052 | -0.810429 |
| P | -3.880060  | 1.754641  | 0.061382  |
| C | -2.902688  | 1.090203  | 2.564664  |
| H | -2.355125  | 0.338237  | 2.009238  |
| C | -5.691442  | 1.814316  | -0.306383 |
| C | -2.879687  | 4.433045  | -0.002395 |
| H | -3.084235  | 4.495816  | 1.060314  |
| C | -3.181404  | 3.266348  | -0.715858 |
| C | -3.742583  | 1.965877  | 1.866602  |
| C | -6.171494  | 2.710760  | -1.299495 |
| H | -5.497852  | 3.437612  | -1.736956 |
| C | -4.488464  | 2.922044  | 2.571856  |
| H | -5.173031  | 3.578347  | 2.042820  |
| C | -7.931717  | 0.841069  | -0.140899 |
| C | -6.559782  | 0.886953  | 0.273286  |
| C | -2.292070  | 5.520391  | -0.654286 |
| H | -2.061073  | 6.419960  | -0.091420 |
| C | -8.389450  | 1.732794  | -1.164519 |
| C | -7.479255  | 2.666551  | -1.717478 |
| H | -7.829659  | 3.355378  | -2.481368 |
| C | -2.876805  | 3.204147  | -2.087810 |
| H | -3.072625  | 2.288172  | -2.640917 |
| C | -3.542451  | 2.125567  | 4.651079  |
| H | -3.476085  | 2.181266  | 5.733191  |
| C | -2.803358  | 1.168134  | 3.953314  |
| H | -2.163016  | 0.474418  | 4.489850  |
| C | -4.380639  | 3.003624  | 3.959220  |
| H | -4.969453  | 3.735308  | 4.502985  |
| C | -9.739376  | 1.661476  | -1.600557 |
| H | -10.071132 | 2.341547  | -2.380311 |
| C | -10.166445 | -0.123399 | -0.027536 |
| H | -10.860289 | -0.836056 | 0.408070  |
| C | -2.291889  | 4.290261  | -2.734115 |
| H | -2.049342  | 4.222757  | -3.789834 |
| C | -10.611644 | 0.753778  | -1.045672 |
| H | -11.642512 | 0.709195  | -1.383438 |
| C | -8.862782  | -0.083246 | 0.411798  |
| H | -8.533892  | -0.765882 | 1.186194  |
| C | -1.995929  | 5.451735  | -2.015669 |

|   |           |           |           |
|---|-----------|-----------|-----------|
| H | -1.527151 | 6.294310  | -2.514390 |
| H | -0.938362 | 1.795300  | -1.035531 |
| C | -1.006110 | 0.779724  | -0.663857 |
| H | -0.521290 | 0.607684  | 0.295536  |
| C | -1.096488 | -0.268835 | -1.554558 |
| C | -1.805972 | -1.144298 | -2.128516 |
| C | -1.942840 | -2.261641 | -3.032959 |
| C | -1.055867 | -3.349601 | -2.953690 |
| C | -1.191631 | -4.422623 | -3.830726 |
| H | -0.493124 | -5.250552 | -3.763579 |
| C | -2.208366 | -4.429014 | -4.788322 |
| H | -2.309759 | -5.268989 | -5.469232 |
| H | -3.888833 | -3.351877 | -5.610992 |
| C | -3.095699 | -3.352209 | -4.869308 |
| C | -2.967074 | -2.275813 | -3.995898 |
| H | -3.658588 | -1.443399 | -4.050010 |
| H | -0.269308 | -3.346646 | -2.209696 |
| O | 2.248636  | 2.187292  | 0.146345  |

### TS67-A\_S\_NiCu

|                                             |              |
|---------------------------------------------|--------------|
| Charge                                      | 1            |
| Electronic Energy, BS1 (a.u.)               | -5980.376058 |
| Thermal and entropic correction, BS1 (a.u.) | 1.472831     |
| Electronic Energy, BS2 (a.u.)               | -9902.738519 |
| Number of Imaginary Frequencies             | 1            |
| Imaginary frequencies (cm-1)                | -175.5i      |

### Molecular Geometry in Cartesian Coordinates

|    |          |           |           |
|----|----------|-----------|-----------|
| Cu | 3.479610 | 0.299281  | -0.445723 |
| Fe | 7.138774 | -1.407114 | 1.304640  |
| P  | 5.601877 | 0.796089  | -0.902428 |
| C  | 6.580901 | 0.441462  | 0.597071  |
| C  | 6.020712 | 0.195525  | 1.914840  |
| C  | 7.107838 | 0.004230  | 2.832209  |
| H  | 6.997942 | -0.224068 | 3.882159  |
| C  | 8.321923 | 0.114752  | 2.105711  |
| H  | 9.315027 | -0.030131 | 2.507718  |
| C  | 8.004523 | 0.380797  | 0.742575  |
| H  | 8.714664 | 0.470707  | -0.066491 |
| C  | 6.223373 | -2.866291 | 0.164927  |
| H  | 5.425124 | -2.671619 | -0.533527 |
| C  | 6.066150 | -3.163365 | 1.550939  |
| H  | 5.128910 | -3.231489 | 2.084256  |
| C  | 7.365480 | -3.296838 | 2.125843  |
| H  | 7.584708 | -3.483203 | 3.168391  |
| C  | 8.326985 | -3.086755 | 1.090281  |
| H  | 9.401254 | -3.083346 | 1.214307  |
| C  | 7.621610 | -2.820273 | -0.121523 |
| H  | 8.058188 | -2.570838 | -1.078632 |
| O  | 4.386807 | 0.182625  | 3.631876  |
| C  | 4.621339 | 0.053728  | 2.302067  |
| N  | 3.600660 | -0.198363 | 1.555547  |
| C  | 2.402507 | -0.177790 | 2.412076  |
| C  | 3.012244 | -0.227579 | 3.867244  |
| H  | 2.554283 | 0.535630  | 4.500374  |
| H  | 1.918452 | 0.792136  | 2.251988  |
| C  | 5.846368 | 2.588317  | -1.218763 |

|   |           |           |           |
|---|-----------|-----------|-----------|
| C | 6.955991  | 3.329284  | -0.786976 |
| H | 7.720253  | 2.862500  | -0.173786 |
| C | 7.079016  | 4.674851  | -1.137413 |
| H | 7.942043  | 5.242124  | -0.800760 |
| C | 6.093669  | 5.292664  | -1.909846 |
| H | 6.185234  | 6.342794  | -2.168330 |
| C | 4.974791  | 4.567818  | -2.323649 |
| H | 4.189699  | 5.054428  | -2.893774 |
| C | 4.850399  | 3.223510  | -1.978648 |
| H | 3.973545  | 2.660152  | -2.286001 |
| C | 6.560203  | -0.024752 | -2.239890 |
| C | 6.025149  | -1.186275 | -2.813331 |
| H | 5.047468  | -1.536139 | -2.504650 |
| C | 6.740139  | -1.892087 | -3.782751 |
| H | 6.308578  | -2.790645 | -4.212863 |
| C | 7.992975  | -1.435220 | -4.195773 |
| H | 8.551633  | -1.981562 | -4.950057 |
| C | 8.519568  | -0.258872 | -3.652139 |
| H | 9.483132  | 0.112277  | -3.989070 |
| C | 7.804869  | 0.448005  | -2.684897 |
| H | 8.207660  | 1.376498  | -2.291329 |
| C | 1.419362  | -1.276187 | 2.089229  |
| C | 0.049862  | -1.053596 | 2.264201  |
| C | 1.855504  | -2.544715 | 1.690884  |
| C | -0.870966 | -2.085906 | 2.066428  |
| C | 0.940286  | -3.575033 | 1.481544  |
| C | -0.424232 | -3.351339 | 1.680589  |
| H | -0.291834 | -0.068374 | 2.569722  |
| H | 2.917004  | -2.715583 | 1.549460  |
| H | -1.932362 | -1.909034 | 2.217345  |
| H | 1.292106  | -4.554791 | 1.172408  |
| H | -1.136064 | -4.158262 | 1.542196  |
| C | 2.979134  | -1.574193 | 4.553723  |
| C | 1.795715  | -1.997055 | 5.171072  |
| C | 4.083450  | -2.432013 | 4.536409  |
| C | 1.707232  | -3.268561 | 5.734522  |
| C | 3.996118  | -3.705194 | 5.103909  |
| C | 2.806947  | -4.129820 | 5.697531  |
| H | 0.933540  | -1.335906 | 5.191184  |
| H | 5.013971  | -2.099992 | 4.090383  |
| H | 0.781557  | -3.586906 | 6.204652  |
| H | 4.860756  | -4.362524 | 5.084616  |
| H | 2.739152  | -5.120101 | 6.137622  |
| H | 5.378066  | 7.630906  | 0.568358  |
| C | 3.364716  | 7.402622  | -0.167298 |
| C | 4.507110  | 6.983909  | 0.517275  |
| C | 4.531493  | 5.728849  | 1.130030  |
| H | 5.426414  | 5.392285  | 1.644206  |
| C | 3.414788  | 4.897324  | 1.067083  |
| H | 3.433014  | 3.911911  | 1.519485  |
| H | 0.120891  | 5.052723  | 0.300566  |
| C | 1.026258  | 4.446824  | 0.360607  |
| H | 0.972553  | 3.805491  | 1.243541  |
| C | 2.256685  | 5.317148  | 0.398479  |
| H | 1.349002  | 6.900741  | -0.744992 |
| C | 2.245018  | 6.571078  | -0.223814 |
| H | 3.341801  | 8.377440  | -0.646037 |
| O | 0.952482  | 3.615663  | -0.826914 |
| C | 1.613060  | 2.430081  | -0.783216 |

|    |           |           |           |
|----|-----------|-----------|-----------|
| C  | 0.707623  | 2.098038  | -3.170458 |
| H  | 0.281020  | 3.086130  | -3.002808 |
| H  | -0.097719 | 1.433881  | -3.512919 |
| H  | 1.438376  | 2.169088  | -3.988781 |
| C  | 1.351450  | 1.579154  | -1.913980 |
| N  | 2.004508  | 0.362410  | -1.896151 |
| C  | 1.888003  | -0.480009 | -2.890099 |
| H  | 1.352603  | -0.199673 | -3.796656 |
| C  | 2.465810  | -1.818057 | -2.878592 |
| C  | 2.747551  | -2.505591 | -1.681073 |
| H  | 2.495775  | -2.042247 | -0.734614 |
| H  | 3.480856  | -4.307338 | -0.770381 |
| C  | 3.284355  | -3.790041 | -1.705493 |
| C  | 3.562651  | -4.417638 | -2.925028 |
| H  | 3.988454  | -5.416233 | -2.942645 |
| C  | 3.270773  | -3.753183 | -4.120763 |
| H  | 3.468992  | -4.236384 | -5.073075 |
| C  | 2.717245  | -2.474384 | -4.097846 |
| H  | 2.486517  | -1.967859 | -5.031224 |
| Ni | -3.169962 | -0.147023 | -0.914280 |
| P  | -4.892297 | -1.477658 | -0.744139 |
| C  | -5.967515 | -0.407014 | -3.070503 |
| H  | -4.964274 | -0.011569 | -3.208319 |
| C  | -5.556142 | -1.233317 | 0.972030  |
| C  | -5.445339 | -4.199745 | -1.440374 |
| H  | -6.410025 | -3.873173 | -1.809396 |
| C  | -4.548417 | -3.281074 | -0.877300 |
| C  | -6.254230 | -1.161136 | -1.923292 |
| C  | -5.109852 | -2.142603 | 1.973403  |
| H  | -4.562957 | -3.031165 | 1.681089  |
| C  | -7.555514 | -1.648485 | -1.727793 |
| H  | -7.799418 | -2.198890 | -0.824768 |
| C  | -6.577352 | 0.134326  | 2.731521  |
| C  | -6.271130 | -0.092111 | 1.345194  |
| C  | -5.092288 | -5.544857 | -1.559629 |
| H  | -5.793726 | -6.244743 | -2.003962 |
| C  | -6.095920 | -0.780600 | 3.722509  |
| C  | -5.359721 | -1.916457 | 3.303786  |
| H  | -5.004196 | -2.620139 | 4.051882  |
| C  | -3.291396 | -3.734690 | -0.446943 |
| H  | -2.572101 | -3.021293 | -0.059228 |
| C  | -8.255945 | -0.643325 | -3.811942 |
| H  | -9.035035 | -0.437096 | -4.539551 |
| C  | -6.964985 | -0.150556 | -4.011792 |
| H  | -6.736223 | 0.439669  | -4.894082 |
| C  | -8.550092 | -1.391428 | -2.669452 |
| H  | -9.558686 | -1.753163 | -2.498192 |
| C  | -6.369773 | -0.536945 | 5.094417  |
| H  | -5.992974 | -1.239846 | 5.832556  |
| C  | -7.593031 | 1.461010  | 4.507840  |
| H  | -8.175253 | 2.323719  | 4.817720  |
| C  | -2.941741 | -5.077478 | -0.567486 |
| H  | -1.952467 | -5.404664 | -0.263925 |
| C  | -7.104827 | 0.559340  | 5.482857  |
| H  | -7.314894 | 0.733532  | 6.533767  |
| C  | -7.332663 | 1.258251  | 3.171282  |
| H  | -7.705358 | 1.964261  | 2.439324  |
| C  | -3.842435 | -5.986968 | -1.124797 |
| H  | -3.565151 | -7.031072 | -1.234369 |

|   |            |           |           |
|---|------------|-----------|-----------|
| P | -4.039094  | 1.686788  | 0.032599  |
| C | -2.929636  | 0.920274  | 2.444908  |
| H | -2.426088  | 0.192281  | 1.818859  |
| C | -5.861804  | 1.840600  | -0.237928 |
| C | -3.019856  | 4.370255  | 0.009755  |
| H | -3.229409  | 4.422637  | 1.072273  |
| C | -3.325239  | 3.211045  | -0.715453 |
| C | -3.800694  | 1.835601  | 1.839383  |
| C | -6.347775  | 2.793053  | -1.174826 |
| H | -5.663647  | 3.508521  | -1.615153 |
| C | -4.488505  | 2.762312  | 2.635811  |
| H | -5.200302  | 3.446304  | 2.183211  |
| C | -8.130953  | 0.955070  | -0.004871 |
| C | -6.740280  | 0.925259  | 0.344531  |
| C | -2.426213  | 5.462552  | -0.628283 |
| H | -2.195996  | 6.356790  | -0.056161 |
| C | -8.593454  | 1.895288  | -0.981265 |
| C | -7.670884  | 2.812936  | -1.540862 |
| H | -8.024523  | 3.538636  | -2.268273 |
| C | -3.017846  | 3.163634  | -2.087234 |
| H | -3.218628  | 2.252926  | -2.647135 |
| C | -3.426637  | 1.857510  | 4.613663  |
| H | -3.295456  | 1.859395  | 5.691387  |
| C | -2.743390  | 0.928031  | 3.826426  |
| H | -2.082161  | 0.199231  | 4.286321  |
| C | -4.294303  | 2.775649  | 4.016703  |
| H | -4.841629  | 3.483931  | 4.630448  |
| C | -9.959378  | 1.883614  | -1.370632 |
| H | -10.293609 | 2.598951  | -2.117141 |
| C | -10.394468 | 0.065927  | 0.161442  |
| H | -11.097592 | -0.634778 | 0.601749  |
| C | -2.426912  | 4.255100  | -2.721427 |
| H | -2.187835  | 4.200248  | -3.779049 |
| C | -10.843322 | 0.987553  | -0.815286 |
| H | -11.885655 | 0.987071  | -1.119254 |
| C | -9.075936  | 0.049961  | 0.556426  |
| H | -8.745253  | -0.665345 | 1.300129  |
| C | -2.127161  | 5.407846  | -1.990534 |
| H | -1.657693  | 6.255716  | -2.479944 |
| H | -0.990392  | 1.963823  | -1.049147 |
| C | -0.698926  | 0.954930  | -0.793467 |
| H | -0.221800  | 0.797317  | 0.169373  |
| C | -1.190081  | -0.118940 | -1.471104 |
| C | -1.857600  | -1.108510 | -1.946248 |
| C | -1.704329  | -2.322092 | -2.726822 |
| C | -0.589197  | -3.148570 | -2.506043 |
| C | -0.451353  | -4.347268 | -3.200595 |
| H | 0.424331   | -4.965888 | -3.028058 |
| C | -1.432207  | -4.742088 | -4.114486 |
| H | -1.329394  | -5.679378 | -4.653484 |
| H | -3.321947  | -4.243641 | -5.028985 |
| C | -2.552051  | -3.932464 | -4.329233 |
| C | -2.691423  | -2.731389 | -3.637939 |
| H | -3.570357  | -2.110413 | -3.781888 |
| H | 0.150840   | -2.849759 | -1.774762 |
| O | 2.295176   | 2.110746  | 0.210914  |

Int7-A\_S\_NiCu

Charge

1

|                                             |              |
|---------------------------------------------|--------------|
| Electronic Energy, BS1 (a.u.)               | -5980.405504 |
| Thermal and entropic correction, BS1 (a.u.) | 1.475543     |
| Electronic Energy, BS2 (a.u.)               | -9902.772244 |
| Number of Imaginary Frequencies             | 0            |
| Imaginary frequencies (cm-1)                | None         |

**Molecular Geometry in Cartesian Coordinates**

|    |           |           |           |
|----|-----------|-----------|-----------|
| Cu | -3.367398 | 0.002811  | 0.425383  |
| Fe | -7.740441 | -0.864077 | 0.456652  |
| P  | -4.833152 | 0.056807  | 2.147349  |
| C  | -6.471651 | 0.418598  | 1.440763  |
| C  | -6.727479 | 0.871666  | 0.086065  |
| C  | -8.137113 | 1.108176  | -0.041809 |
| H  | -8.629546 | 1.420824  | -0.950409 |
| C  | -8.751995 | 0.804557  | 1.200786  |
| H  | -9.812986 | 0.836275  | 1.405982  |
| C  | -7.740510 | 0.376864  | 2.107233  |
| H  | -7.899369 | 0.032005  | 3.118717  |
| C  | -6.755214 | -2.608416 | -0.022151 |
| H  | -5.681280 | -2.711975 | 0.010221  |
| C  | -7.522459 | -2.158955 | -1.139685 |
| H  | -7.137280 | -1.861380 | -2.104289 |
| C  | -8.891064 | -2.103903 | -0.742662 |
| H  | -9.715817 | -1.761371 | -1.352384 |
| C  | -8.971827 | -2.524792 | 0.619064  |
| H  | -9.869706 | -2.555322 | 1.220888  |
| C  | -7.654093 | -2.837737 | 1.065127  |
| H  | -7.371959 | -3.141599 | 2.062980  |
| O  | -6.366697 | 1.390697  | -2.186528 |
| C  | -5.803971 | 0.967456  | -1.039158 |
| N  | -4.550416 | 0.663372  | -1.082838 |
| C  | -4.069293 | 0.846770  | -2.475222 |
| C  | -5.345417 | 1.391268  | -3.223180 |
| H  | -5.174734 | 2.440558  | -3.476370 |
| H  | -3.309723 | 1.629825  | -2.448165 |
| C  | -4.510113 | 1.457379  | 3.291312  |
| C  | -5.491499 | 2.343040  | 3.758034  |
| H  | -6.525983 | 2.222064  | 3.456129  |
| C  | -5.137270 | 3.406186  | 4.591678  |
| H  | -5.902065 | 4.093518  | 4.940708  |
| C  | -3.805293 | 3.591658  | 4.969432  |
| H  | -3.533453 | 4.424297  | 5.611021  |
| C  | -2.823826 | 2.704908  | 4.517888  |
| H  | -1.785990 | 2.844390  | 4.805526  |
| C  | -3.176133 | 1.646397  | 3.682413  |
| H  | -2.414943 | 0.966408  | 3.313683  |
| C  | -5.137818 | -1.363144 | 3.270040  |
| C  | -4.708458 | -2.635419 | 2.869324  |
| H  | -4.168410 | -2.754231 | 1.938189  |
| C  | -4.978650 | -3.752588 | 3.661615  |
| H  | -4.640004 | -4.730857 | 3.335672  |
| C  | -5.672122 | -3.605411 | 4.864398  |
| H  | -5.882258 | -4.473364 | 5.482195  |
| C  | -6.081117 | -2.335097 | 5.282616  |
| H  | -6.603624 | -2.215067 | 6.227001  |
| C  | -5.810396 | -1.217079 | 4.493805  |
| H  | -6.108409 | -0.231059 | 4.837905  |
| C  | -3.422026 | -0.427681 | -2.976855 |

|    |           |           |           |
|----|-----------|-----------|-----------|
| C  | -2.036723 | -0.450920 | -3.162871 |
| C  | -4.154679 | -1.605138 | -3.187838 |
| C  | -1.388599 | -1.628533 | -3.541519 |
| C  | -3.514857 | -2.774512 | -3.595838 |
| C  | -2.126443 | -2.791080 | -3.763955 |
| H  | -1.466608 | 0.453454  | -2.981215 |
| H  | -5.228410 | -1.603463 | -3.048373 |
| H  | -0.311101 | -1.635921 | -3.658340 |
| H  | -4.098098 | -3.673250 | -3.774826 |
| H  | -1.622162 | -3.705452 | -4.062583 |
| C  | -5.837403 | 0.650245  | -4.442909 |
| C  | -5.037163 | 0.642095  | -5.591953 |
| C  | -7.058006 | -0.031940 | -4.452635 |
| C  | -5.440417 | -0.058666 | -6.726728 |
| C  | -7.461731 | -0.733154 | -5.591601 |
| C  | -6.653465 | -0.752751 | -6.728434 |
| H  | -4.086250 | 1.168722  | -5.591211 |
| H  | -7.691041 | -0.007516 | -3.572495 |
| H  | -4.808116 | -0.064002 | -7.609384 |
| H  | -8.411604 | -1.259971 | -5.589667 |
| H  | -6.967768 | -1.298549 | -7.612791 |
| H  | -7.020475 | 4.325916  | -0.970161 |
| C  | -4.988290 | 4.459949  | -1.678744 |
| C  | -5.969909 | 4.275745  | -0.701573 |
| C  | -5.594712 | 4.030712  | 0.621599  |
| H  | -6.350786 | 3.890443  | 1.387433  |
| C  | -4.244201 | 3.984434  | 0.966832  |
| H  | -3.952016 | 3.827355  | 1.999194  |
| H  | -1.635068 | 4.777897  | 1.260444  |
| C  | -1.805579 | 4.148647  | 0.384863  |
| H  | -1.158083 | 4.482819  | -0.427641 |
| C  | -3.257076 | 4.154107  | -0.010563 |
| H  | -2.870415 | 4.505722  | -2.097572 |
| C  | -3.636664 | 4.381271  | -1.338214 |
| H  | -5.277123 | 4.675544  | -2.703449 |
| O  | -1.332580 | 2.838914  | 0.832123  |
| C  | -1.037870 | 1.953569  | -0.130452 |
| C  | 0.216044  | 0.900249  | 1.826084  |
| H  | 1.015532  | 1.640773  | 1.791610  |
| H  | 0.636685  | -0.026963 | 2.215647  |
| H  | -0.558780 | 1.249896  | 2.506367  |
| C  | -0.352504 | 0.678253  | 0.415810  |
| N  | -1.390485 | -0.411065 | 0.441424  |
| C  | -0.950102 | -1.584726 | 0.749318  |
| H  | 0.087506  | -1.719875 | 1.064737  |
| C  | -1.736218 | -2.816010 | 0.700715  |
| C  | -2.753385 | -2.998395 | -0.250677 |
| H  | -2.952666 | -2.222365 | -0.979656 |
| H  | -4.214150 | -4.347404 | -1.058720 |
| C  | -3.453148 | -4.202339 | -0.298914 |
| C  | -3.160457 | -5.222143 | 0.612057  |
| H  | -3.711478 | -6.157125 | 0.574909  |
| C  | -2.137521 | -5.050948 | 1.550946  |
| H  | -1.896492 | -5.849920 | 2.245265  |
| C  | -1.411300 | -3.862221 | 1.581130  |
| H  | -0.593167 | -3.736205 | 2.285821  |
| Ni | 3.826070  | 0.881384  | -0.533926 |
| P  | 5.861955  | 1.504290  | 0.017188  |
| C  | 6.910901  | 1.188933  | -2.534170 |



|   |           |           |           |
|---|-----------|-----------|-----------|
| H | 5.862521  | 1.143895  | -2.818056 |
| C | 6.303850  | 0.347635  | 1.417916  |
| C | 7.072242  | 4.081429  | 0.432657  |
| H | 7.892029  | 3.763873  | -0.201263 |
| C | 6.019631  | 3.202766  | 0.724278  |
| C | 7.241025  | 1.363695  | -1.183150 |
| C | 6.117188  | 0.802664  | 2.753604  |
| H | 5.929001  | 1.853688  | 2.935087  |
| C | 8.592252  | 1.394760  | -0.805745 |
| H | 8.858848  | 1.498454  | 0.241817  |
| C | 6.664048  | -1.914872 | 2.301747  |
| C | 6.583753  | -1.004461 | 1.192401  |
| C | 7.066226  | 5.383685  | 0.938835  |
| H | 7.885698  | 6.054750  | 0.697673  |
| C | 6.432889  | -1.437293 | 3.631565  |
| C | 6.172051  | -0.058294 | 3.821744  |
| H | 6.024256  | 0.316595  | 4.831454  |
| C | 4.958052  | 3.664216  | 1.522568  |
| H | 4.110360  | 3.010805  | 1.703796  |
| C | 9.256040  | 1.080708  | -3.108911 |
| H | 10.038222 | 0.959764  | -3.852423 |
| C | 7.914260  | 1.047342  | -3.493372 |
| H | 7.649006  | 0.900467  | -4.536273 |
| C | 9.593965  | 1.256913  | -1.764869 |
| H | 10.635895 | 1.260768  | -1.460914 |
| C | 6.483159  | -2.345725 | 4.722535  |
| H | 6.303195  | -1.964595 | 5.724437  |
| C | 7.002568  | -4.154113 | 3.208871  |
| H | 7.226813  | -5.205256 | 3.052099  |
| C | 4.960562  | 4.957266  | 2.038912  |
| H | 4.121283  | 5.298725  | 2.636502  |
| C | 6.760933  | -3.677670 | 4.519609  |
| H | 6.801786  | -4.363450 | 5.360667  |
| C | 6.955156  | -3.298706 | 2.131586  |
| H | 7.137521  | -3.680025 | 1.134138  |
| C | 6.016228  | 5.823209  | 1.745252  |
| H | 6.012662  | 6.838428  | 2.131133  |
| P | 4.096107  | -1.287145 | -0.695315 |
| C | 2.896910  | -1.575392 | 1.792642  |
| H | 2.724562  | -0.510672 | 1.667760  |
| C | 5.817535  | -1.856051 | -1.071504 |
| C | 2.535995  | -3.285507 | -2.089484 |
| H | 2.598681  | -3.915638 | -1.209389 |
| C | 3.108668  | -2.006142 | -2.084870 |
| C | 3.593960  | -2.259423 | 0.786208  |
| C | 6.123793  | -2.409989 | -2.345090 |
| H | 5.321364  | -2.642514 | -3.034860 |
| C | 3.897211  | -3.616251 | 0.969171  |
| H | 4.488275  | -4.143161 | 0.225925  |
| C | 8.208741  | -1.829275 | -0.546998 |
| C | 6.848401  | -1.563124 | -0.177513 |
| C | 1.879638  | -3.763423 | -3.226841 |
| H | 1.442454  | -4.757844 | -3.216609 |
| C | 8.498159  | -2.350063 | -1.849304 |
| C | 7.423185  | -2.640219 | -2.724679 |
| H | 7.640042  | -3.051497 | -3.707110 |
| C | 2.979564  | -1.202092 | -3.231031 |
| H | 3.382601  | -0.192555 | -3.213669 |
| C | 2.759276  | -3.601225 | 3.105950  |

|   |           |           |           |
|---|-----------|-----------|-----------|
| H | 2.449744  | -4.119673 | 4.008821  |
| C | 2.475605  | -2.242252 | 2.944377  |
| H | 1.952835  | -1.696889 | 3.725824  |
| C | 3.476124  | -4.283778 | 2.119832  |
| H | 3.728760  | -5.330649 | 2.258205  |
| C | 9.849229  | -2.563746 | -2.232126 |
| H | 10.052667 | -2.951166 | -3.226926 |
| C | 10.598735 | -1.791751 | -0.068643 |
| H | 11.415693 | -1.582180 | 0.615572  |
| C | 2.342979  | -1.686693 | -4.373149 |
| H | 2.264980  | -1.058966 | -5.256090 |
| C | 10.880332 | -2.290295 | -1.363403 |
| H | 11.909730 | -2.458904 | -1.665241 |
| C | 9.300283  | -1.566434 | 0.328440  |
| H | 9.099478  | -1.175188 | 1.318633  |
| C | 1.799187  | -2.975187 | -4.376389 |
| H | 1.301946  | -3.354335 | -5.264567 |
| H | 0.298092  | 0.283550  | -1.609701 |
| C | 0.752739  | 0.284003  | -0.615308 |
| H | 1.045451  | -0.748857 | -0.416390 |
| C | 1.965499  | 1.136771  | -0.590218 |
| C | 2.531014  | 2.294102  | -0.554431 |
| C | 2.470177  | 3.740087  | -0.473692 |
| C | 1.608026  | 4.395356  | 0.426163  |
| C | 1.617996  | 5.785893  | 0.537349  |
| H | 0.952783  | 6.274138  | 1.245400  |
| C | 2.480957  | 6.550782  | -0.251040 |
| H | 2.489761  | 7.632957  | -0.161252 |
| H | 4.027231  | 6.496168  | -1.753833 |
| C | 3.341445  | 5.911071  | -1.148088 |
| C | 3.343988  | 4.523031  | -1.250759 |
| H | 4.036651  | 4.016734  | -1.915786 |
| H | 0.944999  | 3.807612  | 1.051322  |
| O | -1.260516 | 2.144663  | -1.309038 |

#### Int6-A\_R\_NiCu

|                                             |              |
|---------------------------------------------|--------------|
| Charge                                      | 1            |
| Electronic Energy, BS1 (a.u.)               | -5980.390034 |
| Thermal and entropic correction, BS1 (a.u.) | 1.475505     |
| Electronic Energy, BS2 (a.u.)               | -9902.750083 |
| Number of Imaginary Frequencies             | 0            |
| Imaginary frequencies (cm-1)                | None         |

#### Molecular Geometry in Cartesian Coordinates

|    |          |           |           |
|----|----------|-----------|-----------|
| Cu | 2.979946 | 0.526329  | 0.138948  |
| Fe | 5.592677 | -2.421720 | -2.276847 |
| P  | 2.495806 | -0.991097 | -1.372813 |
| C  | 3.940717 | -1.210469 | -2.481582 |
| C  | 5.165324 | -0.422807 | -2.415523 |
| C  | 6.004198 | -0.808956 | -3.511038 |
| H  | 6.991450 | -0.413460 | -3.698256 |
| C  | 5.327897 | -1.808641 | -4.256390 |
| H  | 5.717281 | -2.328076 | -5.120830 |
| C  | 4.068588 | -2.048327 | -3.637869 |
| H  | 3.329780 | -2.752733 | -3.990002 |
| C  | 5.358396 | -3.584601 | -0.579399 |
| H  | 4.487875 | -3.553758 | 0.057511  |

|   |           |           |           |
|---|-----------|-----------|-----------|
| C | 6.516035  | -2.760134 | -0.458351 |
| H | 6.672033  | -1.990587 | 0.284852  |
| C | 7.403343  | -3.083121 | -1.530553 |
| H | 8.353011  | -2.609712 | -1.738570 |
| C | 6.790779  | -4.106565 | -2.315307 |
| H | 7.196225  | -4.541184 | -3.218655 |
| C | 5.527375  | -4.415527 | -1.727291 |
| H | 4.806361  | -5.127291 | -2.102791 |
| O | 6.664076  | 1.312697  | -1.758826 |
| C | 5.552349  | 0.594858  | -1.444661 |
| N | 4.957675  | 0.907839  | -0.350763 |
| C | 5.616727  | 2.119435  | 0.181799  |
| C | 6.990824  | 2.106826  | -0.576039 |
| H | 7.242905  | 3.108959  | -0.929120 |
| H | 5.023936  | 2.963147  | -0.190695 |
| C | 1.141027  | -0.534785 | -2.537885 |
| C | 0.756896  | 0.815199  | -2.569520 |
| H | 1.274150  | 1.543191  | -1.948234 |
| C | -0.301860 | 1.223014  | -3.383196 |
| H | -0.571372 | 2.272389  | -3.402915 |
| C | -0.994631 | 0.291990  | -4.159425 |
| H | -1.831288 | 0.613062  | -4.773204 |
| C | -0.605986 | -1.050920 | -4.145411 |
| H | -1.135137 | -1.779010 | -4.753900 |
| C | 0.462938  | -1.459026 | -3.346836 |
| H | 0.756088  | -2.503458 | -3.338300 |
| C | 2.014446  | -2.649135 | -0.734272 |
| C | 1.536675  | -2.668893 | 0.585836  |
| H | 1.469272  | -1.739990 | 1.143590  |
| C | 1.198678  | -3.874404 | 1.202490  |
| H | 0.874903  | -3.869790 | 2.237848  |
| C | 1.320260  | -5.075121 | 0.504587  |
| H | 1.066531  | -6.014765 | 0.985814  |
| C | 1.780399  | -5.066502 | -0.815294 |
| H | 1.881158  | -5.999539 | -1.362654 |
| C | 2.126758  | -3.863637 | -1.429736 |
| H | 2.525265  | -3.884386 | -2.436298 |
| C | 5.591981  | 2.168381  | 1.689663  |
| C | 5.024287  | 3.273638  | 2.331292  |
| C | 6.042846  | 1.091780  | 2.463359  |
| C | 4.909084  | 3.307038  | 3.721981  |
| C | 5.925125  | 1.118389  | 3.850517  |
| C | 5.355474  | 2.225920  | 4.483707  |
| H | 4.642929  | 4.099971  | 1.737378  |
| H | 6.471407  | 0.223866  | 1.975573  |
| H | 4.458087  | 4.168545  | 4.205775  |
| H | 6.259174  | 0.265893  | 4.433675  |
| H | 5.256993  | 2.243419  | 5.565302  |
| C | 8.161676  | 1.495267  | 0.158270  |
| C | 8.815574  | 2.246773  | 1.141885  |
| C | 8.569573  | 0.179051  | -0.079294 |
| C | 9.846301  | 1.682892  | 1.892036  |
| C | 9.600241  | -0.387217 | 0.673825  |
| C | 10.237684 | 0.360975  | 1.664565  |
| H | 8.500631  | 3.268371  | 1.337080  |
| H | 8.087488  | -0.394461 | -0.861342 |
| H | 10.341686 | 2.274023  | 2.656310  |
| H | 9.905607  | -1.412284 | 0.482938  |
| H | 11.038802 | -0.078886 | 2.250832  |

|    |           |           |           |
|----|-----------|-----------|-----------|
| H  | -0.471070 | 4.747306  | -5.261965 |
| C  | 1.219373  | 4.261308  | -4.011295 |
| C  | -0.050644 | 4.790489  | -4.260571 |
| C  | -0.771787 | 5.380303  | -3.219359 |
| H  | -1.760745 | 5.790920  | -3.400783 |
| C  | -0.212584 | 5.464070  | -1.942700 |
| H  | -0.765839 | 5.950228  | -1.146151 |
| H  | 1.451438  | 6.119861  | 0.064845  |
| C  | 1.704013  | 5.130653  | -0.326680 |
| H  | 2.791562  | 5.055701  | -0.415418 |
| C  | 1.062288  | 4.944821  | -1.685710 |
| H  | 2.740943  | 3.900679  | -2.524374 |
| C  | 1.765954  | 4.329955  | -2.729734 |
| H  | 1.780540  | 3.791317  | -4.813629 |
| O  | 1.253811  | 4.231453  | 0.708988  |
| C  | 1.860476  | 2.997216  | 0.746433  |
| C  | 1.065004  | 2.889834  | 3.171105  |
| H  | 0.720636  | 3.902953  | 2.967238  |
| H  | 1.751698  | 2.931163  | 4.029177  |
| H  | 0.195858  | 2.292277  | 3.489456  |
| C  | 1.739218  | 2.303267  | 1.967009  |
| N  | 2.331661  | 1.062029  | 2.013495  |
| C  | 2.324823  | 0.348371  | 3.116480  |
| H  | 1.786396  | 0.722202  | 3.986471  |
| C  | 3.032950  | -0.901851 | 3.346643  |
| C  | 3.985581  | -1.473617 | 2.475344  |
| H  | 4.229992  | -0.970746 | 1.546124  |
| H  | 5.386862  | -3.064258 | 2.136393  |
| C  | 4.641177  | -2.655691 | 2.810257  |
| C  | 4.370210  | -3.312628 | 4.013953  |
| H  | 4.888776  | -4.232512 | 4.266709  |
| C  | 3.441657  | -2.754897 | 4.896675  |
| H  | 3.233307  | -3.238676 | 5.847380  |
| C  | 2.795375  | -1.566451 | 4.570521  |
| H  | 2.095685  | -1.126638 | 5.274602  |
| Ni | -2.778985 | 0.854338  | 0.352007  |
| P  | -4.723956 | 0.878032  | -0.682013 |
| C  | -5.972928 | 2.053977  | 1.490453  |
| H  | -4.957434 | 2.291868  | 1.794260  |
| C  | -4.973302 | -0.816458 | -1.386510 |
| C  | -5.931878 | 2.425404  | -2.751068 |
| H  | -6.892891 | 2.177214  | -2.315978 |
| C  | -4.742814 | 1.965572  | -2.164994 |
| C  | -6.188448 | 1.341117  | 0.301560  |
| C  | -4.568815 | -1.031712 | -2.734202 |
| H  | -4.261212 | -0.190590 | -3.343035 |
| C  | -7.498670 | 1.028085  | -0.090467 |
| H  | -7.673652 | 0.436982  | -0.983501 |
| C  | -5.370549 | -3.222413 | -1.154620 |
| C  | -5.350214 | -1.901386 | -0.593411 |
| C  | -5.885022 | 3.232482  | -3.888044 |
| H  | -6.809904 | 3.591991  | -4.328943 |
| C  | -4.957379 | -3.417873 | -2.512295 |
| C  | -4.553542 | -2.293662 | -3.273934 |
| H  | -4.236334 | -2.440178 | -4.302932 |
| C  | -3.513272 | 2.327647  | -2.733189 |
| H  | -2.590880 | 1.995144  | -2.272424 |
| C  | -8.357829 | 2.142343  | 1.874978  |
| H  | -9.200442 | 2.447106  | 2.488174  |

|   |            |           |           |
|---|------------|-----------|-----------|
| C | -7.056167  | 2.455151  | 2.272123  |
| H | -6.882542  | 3.006502  | 3.191148  |
| C | -8.578021  | 1.428546  | 0.694438  |
| H | -9.586878  | 1.162252  | 0.396722  |
| C | -4.959861  | -4.726995 | -3.062615 |
| H | -4.641409  | -4.858781 | -4.093122 |
| C | -5.776120  | -5.618491 | -0.970317 |
| H | -6.091926  | -6.473941 | -0.380838 |
| C | -3.470244  | 3.122257  | -3.878377 |
| H | -2.510645  | 3.400796  | -4.299868 |
| C | -5.364278  | -5.806183 | -2.311254 |
| H | -5.369771  | -6.802278 | -2.743233 |
| C | -5.772810  | -4.363750 | -0.404866 |
| H | -6.079141  | -4.238026 | 0.626434  |
| C | -4.656458  | 3.578230  | -4.456036 |
| H | -4.624860  | 4.207238  | -5.340672 |
| P | -2.993185  | -1.118652 | 1.318027  |
| C | -1.801893  | -2.525458 | -0.772715 |
| H | -1.553750  | -1.549844 | -1.179310 |
| C | -4.756977  | -1.422125 | 1.810536  |
| C | -1.299582  | -2.106988 | 3.391635  |
| H | -1.210427  | -3.022336 | 2.819146  |
| C | -2.087217  | -1.052228 | 2.915136  |
| C | -2.471207  | -2.631639 | 0.453953  |
| C | -5.146395  | -1.234569 | 3.165132  |
| H | -4.397130  | -1.025449 | 3.917613  |
| C | -2.800475  | -3.897790 | 0.963984  |
| H | -3.348438  | -3.981734 | 1.897868  |
| C | -7.101497  | -1.825227 | 1.226437  |
| C | -5.723191  | -1.716786 | 0.846764  |
| C | -0.610141  | -1.976644 | 4.599198  |
| H | 0.017357   | -2.789879 | 4.948850  |
| C | -7.477105  | -1.591657 | 2.588469  |
| C | -6.465869  | -1.308469 | 3.538275  |
| H | -6.746466  | -1.149907 | 4.575950  |
| C | -2.159111  | 0.141522  | 3.655972  |
| H | -2.736798  | 0.979878  | 3.273734  |
| C | -1.808365  | -4.936304 | -0.975320 |
| H | -1.558657  | -5.830264 | -1.537868 |
| C | -1.482702  | -3.680091 | -1.485455 |
| H | -0.983627  | -3.594681 | -2.441975 |
| C | -2.459168  | -5.046294 | 0.255161  |
| H | -2.724296  | -6.022560 | 0.648334  |
| C | -8.848556  | -1.641754 | 2.954653  |
| H | -9.117594  | -1.457346 | 3.991023  |
| C | -9.451116  | -2.161420 | 0.672395  |
| H | -10.219823 | -2.384834 | -0.061287 |
| C | -1.479816  | 0.263612  | 4.866291  |
| H | -1.544653  | 1.188880  | 5.430335  |
| C | -9.817764  | -1.918202 | 2.018446  |
| H | -10.863532 | -1.954916 | 2.307817  |
| C | -8.130776  | -2.116715 | 0.286279  |
| H | -7.866839  | -2.299430 | -0.748506 |
| C | -0.706905  | -0.799575 | 5.341548  |
| H | -0.172186  | -0.703180 | 6.281524  |
| H | -0.401778  | 0.537530  | 1.685066  |
| C | -0.685396  | 0.867501  | 0.691076  |
| H | -0.098010  | 0.437300  | -0.116721 |
| C | -1.255951  | 2.104522  | 0.529274  |

|   |           |          |           |
|---|-----------|----------|-----------|
| C | -2.280481 | 2.835049 | 0.367329  |
| C | -2.779004 | 4.193677 | 0.428773  |
| C | -1.957407 | 5.165482 | 1.040031  |
| C | -2.398135 | 6.480295 | 1.160584  |
| H | -1.756048 | 7.218593 | 1.632221  |
| C | -3.655625 | 6.852029 | 0.673672  |
| H | -3.995082 | 7.879204 | 0.766794  |
| H | -5.451955 | 6.172352 | -0.307185 |
| C | -4.472834 | 5.894341 | 0.071246  |
| C | -4.043884 | 4.572862 | -0.045006 |
| H | -4.689097 | 3.842610 | -0.511515 |
| H | -0.971503 | 4.876145 | 1.387141  |
| O | 2.469826  | 2.590840 | -0.283075 |

#### TS67-A\_R\_NiCu

|                                             |              |
|---------------------------------------------|--------------|
| Charge                                      | 1            |
| Electronic Energy, BS1 (a.u.)               | -5980.387318 |
| Thermal and entropic correction, BS1 (a.u.) | 1.478311     |
| Electronic Energy, BS2 (a.u.)               | -9902.743583 |
| Number of Imaginary Frequencies             | 1            |
| Imaginary frequencies (cm-1)                | -63.0i       |

#### Molecular Geometry in Cartesian Coordinates

|    |           |           |           |
|----|-----------|-----------|-----------|
| Cu | 3.079226  | 0.504787  | 0.141978  |
| Fe | 5.608278  | -2.467189 | -2.277469 |
| P  | 2.531386  | -1.019100 | -1.351264 |
| C  | 3.955372  | -1.257408 | -2.483074 |
| C  | 5.183989  | -0.471793 | -2.453641 |
| C  | 6.003968  | -0.884405 | -3.554369 |
| H  | 6.988869  | -0.495780 | -3.766818 |
| C  | 5.312554  | -1.897191 | -4.266755 |
| H  | 5.686194  | -2.436331 | -5.126030 |
| C  | 4.062714  | -2.119327 | -3.623253 |
| H  | 3.316937  | -2.829461 | -3.948007 |
| C  | 5.397626  | -3.593441 | -0.552445 |
| H  | 4.536990  | -3.546646 | 0.096940  |
| C  | 6.559735  | -2.770471 | -0.467719 |
| H  | 6.730819  | -1.985740 | 0.256025  |
| C  | 7.428764  | -3.119150 | -1.546910 |
| H  | 8.376501  | -2.653659 | -1.780134 |
| C  | 6.800387  | -4.157060 | -2.299382 |
| H  | 7.189846  | -4.612318 | -3.199566 |
| C  | 5.545691  | -4.449097 | -1.684914 |
| H  | 4.816396  | -5.166025 | -2.033497 |
| O  | 6.702051  | 1.270180  | -1.860764 |
| C  | 5.590357  | 0.568416  | -1.515766 |
| N  | 5.010115  | 0.919174  | -0.424303 |
| C  | 5.677205  | 2.147527  | 0.057894  |
| C  | 7.046294  | 2.097045  | -0.704789 |
| H  | 7.306689  | 3.084547  | -1.091288 |
| H  | 5.090231  | 2.980774  | -0.345967 |
| C  | 1.145200  | -0.569242 | -2.477711 |
| C  | 0.747531  | 0.776461  | -2.500108 |
| H  | 1.287897  | 1.514502  | -1.912904 |
| C  | -0.351023 | 1.171121  | -3.265874 |
| H  | -0.636561 | 2.216235  | -3.273384 |
| C  | -1.064842 | 0.230083  | -4.009755 |

|   |           |           |           |
|---|-----------|-----------|-----------|
| H | -1.932864 | 0.539900  | -4.583830 |
| C | -0.658921 | -1.107692 | -4.011630 |
| H | -1.206879 | -1.843341 | -4.593556 |
| C | 0.445143  | -1.503017 | -3.256073 |
| H | 0.744988  | -2.545488 | -3.252335 |
| C | 2.057408  | -2.663732 | -0.675898 |
| C | 1.595680  | -2.661011 | 0.650042  |
| H | 1.537138  | -1.723187 | 1.193527  |
| C | 1.253684  | -3.854887 | 1.286651  |
| H | 0.937148  | -3.834539 | 2.324142  |
| C | 1.354765  | -5.066050 | 0.603646  |
| H | 1.094616  | -5.996084 | 1.099669  |
| C | 1.799597  | -5.079547 | -0.721169 |
| H | 1.882758  | -6.020417 | -1.257829 |
| C | 2.149978  | -3.888519 | -1.355941 |
| H | 2.532901  | -3.926812 | -2.367902 |
| C | 5.651746  | 2.254590  | 1.562608  |
| C | 5.082881  | 3.383650  | 2.161085  |
| C | 6.097699  | 1.206429  | 2.377452  |
| C | 4.961596  | 3.468791  | 3.549321  |
| C | 5.973596  | 1.284719  | 3.762312  |
| C | 5.402878  | 2.415519  | 4.352330  |
| H | 4.709868  | 4.190394  | 1.535301  |
| H | 6.528284  | 0.321140  | 1.923756  |
| H | 4.513057  | 4.349652  | 3.999447  |
| H | 6.306155  | 0.454903  | 4.378253  |
| H | 5.301585  | 2.473713  | 5.432193  |
| C | 8.214940  | 1.496038  | 0.041508  |
| C | 8.880310  | 2.270372  | 0.999502  |
| C | 8.611772  | 0.170691  | -0.161543 |
| C | 9.911791  | 1.720241  | 1.758928  |
| C | 9.643199  | -0.381647 | 0.601062  |
| C | 10.292183 | 0.389539  | 1.566392  |
| H | 8.575358  | 3.300012  | 1.166472  |
| H | 8.122250  | -0.420474 | -0.925626 |
| H | 10.417066 | 2.329302  | 2.502337  |
| H | 9.940889  | -1.413475 | 0.436455  |
| H | 11.094508 | -0.039187 | 2.159246  |
| H | -0.527298 | 4.616744  | -5.215681 |
| C | 1.193415  | 4.199706  | -3.983054 |
| C | -0.097933 | 4.680533  | -4.219301 |
| C | -0.829892 | 5.246469  | -3.172430 |
| H | -1.836343 | 5.616794  | -3.342593 |
| C | -0.260868 | 5.356812  | -1.902331 |
| H | -0.823663 | 5.823841  | -1.101657 |
| H | 1.401275  | 6.091281  | 0.079778  |
| C | 1.689188  | 5.113454  | -0.313282 |
| H | 2.777551  | 5.079270  | -0.414203 |
| C | 1.036308  | 4.888678  | -1.659471 |
| H | 2.746871  | 3.908928  | -2.515043 |
| C | 1.751996  | 4.296387  | -2.708627 |
| H | 1.762675  | 3.747918  | -4.790011 |
| O | 1.294546  | 4.204497  | 0.744007  |
| C | 1.901486  | 2.985699  | 0.754110  |
| C | 1.118587  | 2.848467  | 3.188102  |
| H | 0.665520  | 3.810625  | 2.954446  |
| H | 1.888655  | 3.010676  | 3.956228  |
| H | 0.342867  | 2.211417  | 3.632909  |
| C | 1.716927  | 2.232950  | 1.954691  |

|    |           |           |           |
|----|-----------|-----------|-----------|
| N  | 2.410264  | 1.035321  | 2.012040  |
| C  | 2.447341  | 0.347770  | 3.125884  |
| H  | 1.900305  | 0.714703  | 3.993198  |
| C  | 3.185513  | -0.883181 | 3.368876  |
| C  | 4.126273  | -1.456852 | 2.488026  |
| H  | 4.338102  | -0.973199 | 1.540314  |
| H  | 5.544719  | -3.034445 | 2.156621  |
| C  | 4.808761  | -2.619126 | 2.836636  |
| C  | 4.570582  | -3.250478 | 4.061278  |
| H  | 5.108612  | -4.156332 | 4.323675  |
| C  | 3.648339  | -2.692578 | 4.949855  |
| H  | 3.463762  | -3.161753 | 5.912259  |
| C  | 2.976123  | -1.522155 | 4.610230  |
| H  | 2.278089  | -1.080038 | 5.315185  |
| Ni | -2.942828 | 0.940414  | 0.361765  |
| P  | -4.820490 | 0.869916  | -0.748887 |
| C  | -6.143558 | 2.110605  | 1.346649  |
| H  | -5.139551 | 2.386626  | 1.656278  |
| C  | -5.050558 | -0.855507 | -1.383908 |
| C  | -6.019402 | 2.231814  | -2.955365 |
| H  | -6.984005 | 1.933047  | -2.561432 |
| C  | -4.838011 | 1.895002  | -2.277234 |
| C  | -6.318750 | 1.343651  | 0.184672  |
| C  | -4.654371 | -1.118198 | -2.726047 |
| H  | -4.368363 | -0.294585 | -3.368896 |
| C  | -7.613322 | 0.978722  | -0.213312 |
| H  | -7.757644 | 0.344640  | -1.081996 |
| C  | -5.403651 | -3.257844 | -1.056358 |
| C  | -5.399845 | -1.915936 | -0.544523 |
| C  | -5.962995 | 2.972589  | -4.136115 |
| H  | -6.882947 | 3.235052  | -4.649934 |
| C  | -5.000960 | -3.499420 | -2.409656 |
| C  | -4.622633 | -2.399007 | -3.217980 |
| H  | -4.314582 | -2.580103 | -4.244433 |
| C  | -3.606403 | 2.320451  | -2.794127 |
| H  | -2.695980 | 2.088486  | -2.253433 |
| C  | -8.536212 | 2.145828  | 1.691784  |
| H  | -9.397040 | 2.449660  | 2.279741  |
| C  | -7.250273 | 2.511665  | 2.094837  |
| H  | -7.106915 | 3.103742  | 2.993662  |
| C  | -8.716447 | 1.379534  | 0.537948  |
| H  | -9.712337 | 1.071592  | 0.236511  |
| C  | -4.989802 | -4.828358 | -2.910069 |
| H  | -4.679320 | -4.994302 | -3.938183 |
| C  | -5.774426 | -5.651299 | -0.778557 |
| H  | -6.073433 | -6.487809 | -0.154056 |
| C  | -3.551439 | 3.046799  | -3.983761 |
| H  | -2.589890 | 3.367620  | -4.369467 |
| C  | -5.372042 | -5.884181 | -2.115114 |
| H  | -5.367661 | -6.895844 | -2.509458 |
| C  | -5.783134 | -4.376020 | -0.261027 |
| H  | -6.082240 | -4.215434 | 0.767518  |
| C  | -4.730012 | 3.374176  | -4.656563 |
| H  | -4.690307 | 3.947648  | -5.577961 |
| P  | -3.047325 | -1.059625 | 1.343361  |
| C  | -1.850630 | -2.518224 | -0.708050 |
| H  | -1.626108 | -1.549848 | -1.145531 |
| C  | -4.804933 | -1.378934 | 1.853007  |
| C  | -1.228946 | -1.969420 | 3.353348  |



|   |            |           |           |
|---|------------|-----------|-----------|
| H | -1.116345  | -2.876117 | 2.771489  |
| C | -2.106314  | -0.964986 | 2.924153  |
| C | -2.512094  | -2.598592 | 0.524866  |
| C | -5.197627  | -1.163758 | 3.202127  |
| H | -4.448745  | -0.940058 | 3.951357  |
| C | -2.812403  | -3.855143 | 1.074455  |
| H | -3.350483  | -3.920064 | 2.015737  |
| C | -7.148130  | -1.801005 | 1.275214  |
| C | -5.769840  | -1.691893 | 0.892747  |
| C | -0.484063  | -1.802306 | 4.523139  |
| H | 0.207412   | -2.579023 | 4.834239  |
| C | -7.526901  | -1.535960 | 2.630490  |
| C | -6.517811  | -1.227864 | 3.574998  |
| H | -6.800559  | -1.046534 | 4.608473  |
| C | -2.211012  | 0.218186  | 3.679093  |
| H | -2.854573  | 1.022379  | 3.331060  |
| C | -1.811082  | -4.934350 | -0.837916 |
| H | -1.548477  | -5.840317 | -1.375044 |
| C | -1.511286  | -3.688065 | -1.386965 |
| H | -1.019975  | -3.623214 | -2.349395 |
| C | -2.454095  | -5.018638 | 0.398778  |
| H | -2.699900  | -5.987413 | 0.822298  |
| C | -8.898349  | -1.587647 | 2.997066  |
| H | -9.169503  | -1.376378 | 4.027836  |
| C | -9.494082  | -2.181927 | 0.732012  |
| H | -10.259534 | -2.436856 | 0.005121  |
| C | -1.478144  | 0.375695  | 4.854520  |
| H | -1.574919  | 1.290691  | 5.431056  |
| C | -9.864457  | -1.901797 | 2.069651  |
| H | -10.909939 | -1.940823 | 2.359928  |
| C | -8.174264  | -2.132045 | 0.344793  |
| H | -7.907937  | -2.341809 | -0.684213 |
| C | -0.613313  | -0.637325 | 5.279810  |
| H | -0.038076  | -0.512237 | 6.192399  |
| H | -0.289249  | 0.648573  | 1.872961  |
| C | -0.342846  | 1.198116  | 0.940927  |
| H | 0.288548   | 0.854740  | 0.128510  |
| C | -1.304735  | 2.128668  | 0.729854  |
| C | -2.364552  | 2.796723  | 0.432903  |
| C | -2.803632  | 4.185401  | 0.452948  |
| C | -1.996325  | 5.153379  | 1.086421  |
| C | -2.403673  | 6.483263  | 1.146009  |
| H | -1.772593  | 7.217095  | 1.639553  |
| C | -3.615263  | 6.876799  | 0.566981  |
| H | -3.929107  | 7.915431  | 0.610385  |
| H | -5.363493  | 6.220345  | -0.511518 |
| C | -4.419832  | 5.925277  | -0.062014 |
| C | -4.023805  | 4.588783  | -0.110456 |
| H | -4.657214  | 3.858249  | -0.595253 |
| H | -1.042540  | 4.848388  | 1.504005  |
| O | 2.543019   | 2.600565  | -0.251877 |

#### Int7-A\_R\_NiCu

|                                             |              |
|---------------------------------------------|--------------|
| Charge                                      | 1            |
| Electronic Energy, BS1 (a.u.)               | -5980.421139 |
| Thermal and entropic correction, BS1 (a.u.) | 1.482591     |
| Electronic Energy, BS2 (a.u.)               | -9902.776940 |

Number of Imaginary Frequencies

0

Imaginary frequencies (cm-1)

None

**Molecular Geometry in Cartesian Coordinates**

|    |           |           |           |
|----|-----------|-----------|-----------|
| Cu | 3.060139  | 0.372961  | 0.085117  |
| Fe | 5.705491  | -2.506700 | -2.188869 |
| P  | 2.562621  | -1.143378 | -1.451059 |
| C  | 4.035814  | -1.354593 | -2.521225 |
| C  | 5.240114  | -0.531691 | -2.452423 |
| C  | 6.128811  | -0.954453 | -3.495515 |
| H  | 7.112124  | -0.543723 | -3.670002 |
| C  | 5.503508  | -2.006097 | -4.210798 |
| H  | 5.936523  | -2.559837 | -5.032000 |
| C  | 4.227598  | -2.244518 | -3.627816 |
| H  | 3.523282  | -2.987979 | -3.968834 |
| C  | 5.429121  | -3.577105 | -0.438162 |
| H  | 4.536730  | -3.524298 | 0.167291  |
| C  | 6.575184  | -2.733968 | -0.328273 |
| H  | 6.702565  | -1.922594 | 0.374549  |
| C  | 7.498799  | -3.106241 | -1.352923 |
| H  | 8.450379  | -2.634972 | -1.557174 |
| C  | 6.920391  | -4.178956 | -2.096471 |
| H  | 7.357738  | -4.659132 | -2.960956 |
| C  | 5.642131  | -4.468664 | -1.531970 |
| H  | 4.938115  | -5.206181 | -1.889220 |
| O  | 6.683627  | 1.265395  | -1.851742 |
| C  | 5.572294  | 0.552974  | -1.536663 |
| N  | 4.929281  | 0.938637  | -0.490061 |
| C  | 5.543293  | 2.205725  | -0.035720 |
| C  | 6.954087  | 2.144326  | -0.714914 |
| H  | 7.225161  | 3.117852  | -1.128076 |
| H  | 4.970975  | 3.008425  | -0.516017 |
| C  | 1.205560  | -0.689913 | -2.603792 |
| C  | 0.735213  | 0.630596  | -2.555121 |
| H  | 1.208367  | 1.353730  | -1.899590 |
| C  | -0.346199 | 1.023853  | -3.344742 |
| H  | -0.692969 | 2.048760  | -3.287943 |
| C  | -0.969321 | 0.101851  | -4.186440 |
| H  | -1.827931 | 0.402762  | -4.779075 |
| C  | -0.491804 | -1.210582 | -4.257815 |
| H  | -0.971854 | -1.929724 | -4.915008 |
| C  | 0.592777  | -1.604004 | -3.474448 |
| H  | 0.940082  | -2.631059 | -3.521001 |
| C  | 2.091782  | -2.791858 | -0.787835 |
| C  | 1.593216  | -2.799403 | 0.525330  |
| H  | 1.503878  | -1.863791 | 1.068720  |
| C  | 1.231968  | -3.998003 | 1.141391  |
| H  | 0.867881  | -3.987469 | 2.163130  |
| C  | 1.351898  | -5.203746 | 0.451673  |
| H  | 1.069980  | -6.136306 | 0.930335  |
| C  | 1.834691  | -5.206982 | -0.859271 |
| H  | 1.927950  | -6.142763 | -1.402791 |
| C  | 2.202539  | -4.011040 | -1.474498 |
| H  | 2.604198  | -4.042090 | -2.479035 |
| C  | 5.436726  | 2.394780  | 1.456834  |
| C  | 4.861310  | 3.564615  | 1.965515  |
| C  | 5.831227  | 1.389943  | 2.348327  |
| C  | 4.681570  | 3.731146  | 3.340416  |
| C  | 5.650492  | 1.550083  | 3.720399  |

|    |           |           |           |
|----|-----------|-----------|-----------|
| C  | 5.072608  | 2.719748  | 4.220763  |
| H  | 4.540111  | 4.345051  | 1.280169  |
| H  | 6.268568  | 0.475827  | 1.964037  |
| H  | 4.235156  | 4.645308  | 3.720831  |
| H  | 5.947944  | 0.754367  | 4.396384  |
| H  | 4.930757  | 2.843635  | 5.290382  |
| C  | 8.082078  | 1.589473  | 0.123955  |
| C  | 8.679869  | 2.411202  | 1.087133  |
| C  | 8.504663  | 0.262382  | -0.000303 |
| C  | 9.668287  | 1.905597  | 1.930127  |
| C  | 9.492906  | -0.245160 | 0.846060  |
| C  | 10.072875 | 0.572921  | 1.816692  |
| H  | 8.356548  | 3.443498  | 1.191443  |
| H  | 8.071976  | -0.365163 | -0.769614 |
| H  | 10.121948 | 2.551238  | 2.675841  |
| H  | 9.812217  | -1.278274 | 0.741398  |
| H  | 10.842173 | 0.179329  | 2.473996  |
| H  | -0.526953 | 4.439347  | -5.227549 |
| C  | 1.177474  | 4.098640  | -3.950682 |
| C  | -0.117117 | 4.548800  | -4.227182 |
| C  | -0.879248 | 5.141164  | -3.218179 |
| H  | -1.890047 | 5.481544  | -3.418219 |
| C  | -0.342116 | 5.301351  | -1.940261 |
| H  | -0.925835 | 5.789912  | -1.169962 |
| H  | 1.173312  | 5.995748  | 0.155092  |
| C  | 1.535989  | 5.065464  | -0.281991 |
| H  | 2.628383  | 5.071443  | -0.313509 |
| C  | 0.950352  | 4.845849  | -1.653190 |
| H  | 2.701510  | 3.873294  | -2.443891 |
| C  | 1.704755  | 4.239053  | -2.667572 |
| H  | 1.771171  | 3.632558  | -4.731268 |
| O  | 1.130490  | 4.071362  | 0.725201  |
| C  | 1.667726  | 2.865857  | 0.642878  |
| C  | 0.806208  | 2.623539  | 3.019413  |
| H  | 0.099145  | 3.415082  | 2.787403  |
| H  | 1.688113  | 3.061406  | 3.495858  |
| H  | 0.306585  | 1.949017  | 3.716562  |
| C  | 1.186176  | 1.894182  | 1.729245  |
| N  | 2.249537  | 0.858991  | 1.880461  |
| C  | 2.369286  | 0.286311  | 3.027721  |
| H  | 1.750185  | 0.618352  | 3.859882  |
| C  | 3.256972  | -0.822988 | 3.381894  |
| C  | 4.139342  | -1.470292 | 2.498206  |
| H  | 4.192155  | -1.156728 | 1.460008  |
| H  | 5.638656  | -2.992562 | 2.268961  |
| C  | 4.956781  | -2.500815 | 2.953287  |
| C  | 4.906783  | -2.909203 | 4.290348  |
| H  | 5.548730  | -3.713912 | 4.635839  |
| C  | 4.030275  | -2.281076 | 5.176698  |
| H  | 3.984895  | -2.592414 | 6.215710  |
| C  | 3.214277  | -1.247906 | 4.722922  |
| H  | 2.535131  | -0.754518 | 5.412287  |
| Ni | -2.984020 | 0.997152  | 0.407802  |
| P  | -4.893297 | 0.927679  | -0.700407 |
| C  | -6.312193 | 2.015396  | 1.408859  |
| H  | -5.316482 | 2.246700  | 1.778847  |
| C  | -5.142803 | -0.799428 | -1.361721 |
| C  | -5.999932 | 2.688536  | -2.702277 |
| H  | -6.951697 | 2.637310  | -2.185354 |

|   |           |           |           |
|---|-----------|-----------|-----------|
| C | -4.898545 | 1.964927  | -2.228128 |
| C | -6.442098 | 1.358103  | 0.176474  |
| C | -4.819850 | -1.070834 | -2.720975 |
| H | -4.588495 | -0.250102 | -3.388410 |
| C | -7.720853 | 1.038133  | -0.302580 |
| H | -7.829377 | 0.498989  | -1.239056 |
| C | -5.456824 | -3.208293 | -1.010795 |
| C | -5.445465 | -1.862723 | -0.507617 |
| C | -5.872204 | 3.505134  | -3.829996 |
| H | -6.730116 | 4.071033  | -4.181425 |
| C | -5.107806 | -3.455908 | -2.377112 |
| C | -4.790541 | -2.354158 | -3.208222 |
| H | -4.535798 | -2.535637 | -4.249450 |
| C | -3.669891 | 2.078920  | -2.900588 |
| H | -2.807079 | 1.558447  | -2.498283 |
| C | -8.715390 | 2.022545  | 1.669139  |
| H | -9.597944 | 2.268671  | 2.252068  |
| C | -7.445629 | 2.346819  | 2.151461  |
| H | -7.337232 | 2.848140  | 3.108779  |
| C | -8.852041 | 1.371559  | 0.440676  |
| H | -9.837241 | 1.100815  | 0.074249  |
| C | -5.097059 | -4.788807 | -2.867695 |
| H | -4.826374 | -4.957821 | -3.906756 |
| C | -5.787898 | -5.604956 | -0.702351 |
| H | -6.053854 | -6.439869 | -0.060664 |
| C | -3.548843 | 2.874988  | -4.037016 |
| H | -2.590172 | 2.956765  | -4.540201 |
| C | -5.432198 | -5.843987 | -2.051088 |
| H | -5.429076 | -6.858740 | -2.437903 |
| C | -5.794181 | -4.325519 | -0.194946 |
| H | -6.058137 | -4.160130 | 0.842499  |
| C | -4.652732 | 3.595812  | -4.502889 |
| H | -4.560117 | 4.231004  | -5.379105 |
| P | -3.046956 | -0.998967 | 1.335947  |
| C | -1.876372 | -2.409763 | -0.761738 |
| H | -1.682408 | -1.421702 | -1.171318 |
| C | -4.790486 | -1.362056 | 1.886800  |
| C | -1.143491 | -1.998620 | 3.251258  |
| H | -1.032106 | -2.868209 | 2.615129  |
| C | -2.069408 | -1.002187 | 2.910532  |
| C | -2.518558 | -2.532091 | 0.478460  |
| C | -5.161901 | -1.175971 | 3.246837  |
| H | -4.399856 | -0.978078 | 3.989975  |
| C | -2.788681 | -3.809833 | 0.992812  |
| H | -3.312474 | -3.909946 | 1.939182  |
| C | -7.151087 | -1.752425 | 1.345845  |
| C | -5.778597 | -1.644688 | 0.940007  |
| C | -0.351855 | -1.875600 | 4.397043  |
| H | 0.372657  | -2.648639 | 4.637506  |
| C | -7.504533 | -1.518796 | 2.713317  |
| C | -6.475141 | -1.238307 | 3.644091  |
| H | -6.736272 | -1.081340 | 4.687467  |
| C | -2.176628 | 0.128086  | 3.742487  |
| H | -2.847052 | 0.934029  | 3.457324  |
| C | -1.797402 | -4.819901 | -0.963181 |
| H | -1.530135 | -5.706339 | -1.530185 |
| C | -1.524228 | -3.553357 | -1.479380 |
| H | -1.048790 | -3.450728 | -2.446854 |
| C | -2.423298 | -4.948535 | 0.278563  |

|   |            |           |           |
|---|------------|-----------|-----------|
| H | -2.653409  | -5.932810 | 0.674859  |
| C | -8.868228  | -1.583760 | 3.105775  |
| H | -9.119315  | -1.395159 | 4.146181  |
| C | -9.505940  | -2.134965 | 0.842039  |
| H | -10.284432 | -2.377217 | 0.124554  |
| C | -1.410697  | 0.235949  | 4.902457  |
| H | -1.523086  | 1.106245  | 5.542848  |
| C | -9.851160  | -1.885698 | 2.192073  |
| H | -10.890408 | -1.937220 | 2.502585  |
| C | -8.194803  | -2.066584 | 0.429388  |
| H | -7.947890  | -2.248232 | -0.609628 |
| C | -0.491287  | -0.765765 | 5.231824  |
| H | 0.106389   | -0.681126 | 6.135119  |
| H | -0.211931  | 0.292477  | 1.868632  |
| C | -0.037900  | 1.094414  | 1.146496  |
| H | 0.303219   | 0.595328  | 0.232244  |
| C | -1.317020  | 1.769100  | 0.855418  |
| C | -2.123709  | 2.722038  | 0.543969  |
| C | -2.422178  | 4.141761  | 0.461678  |
| C | -1.786566  | 5.076252  | 1.304816  |
| C | -2.080919  | 6.436595  | 1.222912  |
| H | -1.579062  | 7.135236  | 1.887246  |
| C | -3.013859  | 6.903714  | 0.291937  |
| H | -3.238363  | 7.963974  | 0.224508  |
| H | -4.400007  | 6.330561  | -1.261069 |
| C | -3.663451  | 5.987206  | -0.539982 |
| C | -3.382606  | 4.625751  | -0.446190 |
| H | -3.895197  | 3.923669  | -1.087285 |
| H | -1.053104  | 4.730611  | 2.021168  |
| O | 2.442742   | 2.539410  | -0.249925 |

#### Intli-C\_NiCu

|                                             |               |
|---------------------------------------------|---------------|
| Charge                                      | 1             |
| Electronic Energy, BS1 (a.u.)               | -6284.749139  |
| Thermal and entropic correction, BS1 (a.u.) | 1.541143      |
| Electronic Energy, BS2 (a.u.)               | -10207.233168 |
| Number of Imaginary Frequencies             | 0             |
| Imaginary frequencies (cm-1)                | None          |

#### Molecular Geometry in Cartesian Coordinates

xyz

|    |          |           |           |
|----|----------|-----------|-----------|
| Cu | 2.727462 | 0.256524  | 0.061092  |
| Fe | 6.711016 | -0.609811 | -1.193251 |
| P  | 3.951331 | 1.572618  | -1.247177 |
| C  | 5.689575 | 1.148529  | -0.919791 |
| C  | 6.197163 | 0.650593  | 0.341668  |
| C  | 7.626560 | 0.577352  | 0.247469  |
| H  | 8.280433 | 0.210015  | 1.024700  |
| C  | 8.003409 | 1.021558  | -1.048215 |
| H  | 9.009968 | 1.037063  | -1.442401 |
| C  | 6.822973 | 1.377292  | -1.762234 |
| H  | 6.772432 | 1.724593  | -2.784316 |
| C  | 5.413611 | -2.061790 | -1.899486 |
| H  | 4.345500 | -1.933493 | -1.955297 |
| C  | 6.120646 | -2.551079 | -0.762109 |
| H  | 5.679433 | -2.858576 | 0.174961  |
| C  | 7.516689 | -2.512704 | -1.056423 |

|   |           |           |           |
|---|-----------|-----------|-----------|
| H | 8.318030  | -2.785255 | -0.383224 |
| C | 7.671525  | -2.000629 | -2.381056 |
| H | 8.611100  | -1.814773 | -2.883080 |
| C | 6.371934  | -1.719859 | -2.901088 |
| H | 6.148774  | -1.277909 | -3.862379 |
| O | 6.154340  | 0.094299  | 2.640787  |
| C | 5.431733  | 0.226510  | 1.505843  |
| N | 4.175377  | -0.056829 | 1.572471  |
| C | 3.874701  | -0.433526 | 2.966562  |
| C | 5.313385  | -0.594427 | 3.607096  |
| H | 5.377978  | -0.037719 | 4.544359  |
| H | 3.363116  | 0.412687  | 3.439633  |
| C | 3.914270  | 3.363323  | -0.827806 |
| C | 4.994475  | 4.004291  | -0.202800 |
| H | 5.928919  | 3.476746  | -0.047726 |
| C | 4.873306  | 5.325792  | 0.233623  |
| H | 5.717395  | 5.810721  | 0.715077  |
| C | 3.673120  | 6.015071  | 0.059948  |
| H | 3.573084  | 7.036034  | 0.415631  |
| C | 2.593203  | 5.384262  | -0.564422 |
| H | 1.648998  | 5.906442  | -0.663941 |
| C | 2.713672  | 4.068899  | -1.011459 |
| H | 1.864875  | 3.585492  | -1.486575 |
| C | 3.843971  | 1.468059  | -3.073582 |
| C | 3.349621  | 0.275092  | -3.623519 |
| H | 2.997006  | -0.509458 | -2.962730 |
| C | 3.282952  | 0.109088  | -5.006528 |
| H | 2.887139  | -0.815230 | -5.416876 |
| C | 3.698040  | 1.142788  | -5.851377 |
| H | 3.641494  | 1.019998  | -6.928953 |
| C | 4.173691  | 2.340750  | -5.310123 |
| H | 4.485202  | 3.148014  | -5.966296 |
| C | 4.249329  | 2.505372  | -3.925352 |
| H | 4.612574  | 3.439956  | -3.507997 |
| C | 3.006435  | -1.662603 | 3.085754  |
| C | 2.195644  | -1.827657 | 4.212552  |
| C | 3.075116  | -2.690904 | 2.139149  |
| C | 1.487973  | -3.015023 | 4.408790  |
| C | 2.360457  | -3.873332 | 2.327747  |
| C | 1.572673  | -4.043916 | 3.469504  |
| H | 2.128667  | -1.027054 | 4.944669  |
| H | 3.681034  | -2.550564 | 1.252195  |
| H | 0.870757  | -3.134834 | 5.292816  |
| H | 2.419688  | -4.663641 | 1.585183  |
| H | 1.017722  | -4.965074 | 3.618216  |
| C | 5.803188  | -2.012086 | 3.794840  |
| C | 5.409925  | -2.728792 | 4.931020  |
| C | 6.593574  | -2.643961 | 2.828882  |
| C | 5.773828  | -4.065641 | 5.084220  |
| C | 6.961603  | -3.981754 | 2.984240  |
| C | 6.546703  | -4.698396 | 4.107442  |
| H | 4.801704  | -2.244922 | 5.690114  |
| H | 6.933252  | -2.086892 | 1.963381  |
| H | 5.457865  | -4.612035 | 5.967714  |
| H | 7.576492  | -4.461559 | 2.227998  |
| H | 6.832370  | -5.738946 | 4.227948  |
| H | -0.304155 | -3.320524 | -6.912521 |
| C | 0.334397  | -2.397161 | -5.069821 |
| C | 0.095146  | -3.483817 | -5.916081 |

|    |           |           |           |
|----|-----------|-----------|-----------|
| C  | 0.362206  | -4.779076 | -5.472751 |
| H  | 0.172289  | -5.628937 | -6.121228 |
| C  | 0.860354  | -4.988251 | -4.184304 |
| H  | 1.052669  | -6.000974 | -3.838786 |
| H  | 2.703695  | -3.840295 | -1.855942 |
| C  | 1.660663  | -4.151771 | -1.949722 |
| H  | 1.573207  | -5.202469 | -1.669365 |
| C  | 1.111719  | -3.905995 | -3.334397 |
| H  | 1.019976  | -1.747101 | -3.149209 |
| C  | 0.846232  | -2.605056 | -3.789441 |
| H  | 0.113636  | -1.385692 | -5.393432 |
| O  | 0.867770  | -3.434817 | -0.957530 |
| C  | 1.286570  | -2.232102 | -0.578779 |
| C  | -0.639187 | -2.306385 | 1.118288  |
| H  | -1.571804 | -1.791198 | 1.343863  |
| H  | -0.115902 | -2.527754 | 2.049042  |
| H  | -0.899008 | -3.241328 | 0.627047  |
| C  | 0.227065  | -1.452730 | 0.187533  |
| N  | 0.865605  | -0.265731 | 0.782161  |
| C  | 0.312489  | 0.252286  | 1.821208  |
| H  | -0.572526 | -0.199076 | 2.264225  |
| C  | 0.862051  | 1.409694  | 2.531744  |
| C  | 1.526301  | 2.451763  | 1.870856  |
| H  | 1.551163  | 2.468858  | 0.788595  |
| H  | 2.578431  | 4.308470  | 2.067025  |
| C  | 2.098676  | 3.493216  | 2.595513  |
| C  | 2.010435  | 3.502678  | 3.990085  |
| H  | 2.451590  | 4.318143  | 4.555224  |
| C  | 1.322045  | 2.484264  | 4.658170  |
| H  | 1.233798  | 2.504364  | 5.740300  |
| C  | 0.736978  | 1.448462  | 3.931408  |
| H  | 0.205535  | 0.651349  | 4.441032  |
| O  | 2.370846  | -1.766288 | -0.910690 |
| H  | -0.418719 | -1.090944 | -0.626184 |
| Ni | -3.019947 | 1.255658  | 0.468738  |
| P  | -3.445580 | 0.217064  | -1.418150 |
| C  | -5.869737 | 1.569688  | -1.619461 |
| H  | -5.470139 | 2.147922  | -0.790542 |
| C  | -3.388577 | -1.630468 | -1.265704 |
| C  | -2.461404 | 0.586295  | -4.108096 |
| H  | -3.456676 | 0.362787  | -4.474678 |
| C  | -2.195403 | 0.576129  | -2.732889 |
| C  | -5.091030 | 0.540505  | -2.170008 |
| C  | -2.360811 | -2.356731 | -1.927983 |
| H  | -1.707791 | -1.844343 | -2.624811 |
| C  | -5.623439 | -0.239232 | -3.207583 |
| H  | -5.057172 | -1.077302 | -3.602663 |
| C  | -4.100751 | -3.707532 | -0.184049 |
| C  | -4.283342 | -2.301379 | -0.425278 |
| C  | -1.457561 | 0.923117  | -5.020526 |
| H  | -1.685635 | 0.946138  | -6.082483 |
| C  | -3.021237 | -4.405575 | -0.819067 |
| C  | -2.189333 | -3.703357 | -1.723041 |
| H  | -1.403250 | -4.234564 | -2.249206 |
| C  | -0.903106 | 0.909505  | -2.294377 |
| H  | -0.703028 | 0.978827  | -1.229489 |
| C  | -7.667368 | 1.051393  | -3.149907 |
| H  | -8.668810 | 1.241442  | -3.524135 |
| C  | -7.150795 | 1.825115  | -2.108533 |

|   |            |           |           |
|---|------------|-----------|-----------|
| H | -7.748375  | 2.617517  | -1.667825 |
| C | -6.902367  | 0.019768  | -3.698455 |
| H | -7.312461  | -0.602149 | -4.487896 |
| C | -2.825600  | -5.788980 | -0.555316 |
| H | -1.995500  | -6.295465 | -1.041054 |
| C | -4.764588  | -5.802681 | 0.882712  |
| H | -5.447635  | -6.351999 | 1.523780  |
| C | 0.101380   | 1.228023  | -3.203644 |
| H | 1.087201   | 1.492426  | -2.841214 |
| C | -3.669362  | -6.474676 | 0.286028  |
| H | -3.511694  | -7.531002 | 0.481638  |
| C | -4.980489  | -4.464543 | 0.644376  |
| H | -5.840409  | -3.974552 | 1.086567  |
| C | -0.173108  | 1.239860  | -4.573378 |
| H | 0.608914   | 1.503869  | -5.278752 |
| P | -4.203812  | 0.094604  | 1.921739  |
| C | -2.420088  | -0.654479 | 3.926072  |
| H | -2.166870  | 0.402786  | 3.926429  |
| C | -5.666537  | -0.752794 | 1.120727  |
| C | -5.393221  | 0.835393  | 4.419659  |
| H | -5.219060  | -0.186278 | 4.741897  |
| C | -5.003968  | 1.243781  | 3.134326  |
| C | -3.432370  | -1.122771 | 3.068622  |
| C | -6.956940  | -0.267060 | 1.485113  |
| H | -7.050640  | 0.418352  | 2.316252  |
| C | -3.771888  | -2.477337 | 3.100357  |
| H | -4.567995  | -2.846652 | 2.470825  |
| C | -6.745531  | -2.050621 | -0.666678 |
| C | -5.559290  | -1.661869 | 0.060519  |
| C | -6.005266  | 1.737096  | 5.291565  |
| H | -6.297620  | 1.410099  | 6.285266  |
| C | -8.018307  | -1.506369 | -0.302646 |
| C | -8.089063  | -0.625231 | 0.800609  |
| H | -9.054669  | -0.225859 | 1.099271  |
| C | -5.250974  | 2.567671  | 2.737971  |
| H | -4.931578  | 2.896443  | 1.753368  |
| C | -2.083847  | -2.893537 | 4.781441  |
| H | -1.563116  | -3.579292 | 5.442883  |
| C | -1.758315  | -1.532575 | 4.780916  |
| H | -0.987598  | -1.160276 | 5.449946  |
| C | -3.091680  | -3.362404 | 3.940453  |
| H | -3.360460  | -4.414667 | 3.935592  |
| C | -9.178320  | -1.852458 | -1.045997 |
| H | -10.130902 | -1.421889 | -0.749324 |
| C | -7.848522  | -3.259987 | -2.481675 |
| H | -7.784875  | -3.937071 | -3.328478 |
| C | -5.866099  | 3.466991  | 3.609353  |
| H | -6.036770  | 4.491184  | 3.291559  |
| C | -9.100570  | -2.713074 | -2.115195 |
| H | -9.992358  | -2.973949 | -2.677012 |
| C | -6.707771  | -2.939313 | -1.781395 |
| H | -5.762527  | -3.361740 | -2.095851 |
| C | -6.242603  | 3.053632  | 4.889130  |
| H | -6.715139  | 3.754334  | 5.571166  |
| H | -2.718335  | 3.270938  | 3.292898  |
| C | -2.010385  | 3.560451  | 2.514923  |
| H | -0.990154  | 3.423634  | 2.883197  |
| O | -0.122456  | 5.324465  | 1.608399  |
| C | -2.235035  | 2.796816  | 1.266816  |



|   |           |          |           |
|---|-----------|----------|-----------|
| C | -2.266114 | 2.928198 | -0.018257 |
| C | -1.978058 | 3.717541 | -1.202384 |
| C | -0.749052 | 4.389502 | -1.334888 |
| C | -0.438794 | 5.078197 | -2.507480 |
| H | 0.522361  | 5.575266 | -2.605952 |
| C | -1.352846 | 5.124398 | -3.563329 |
| H | -1.107646 | 5.658797 | -4.476445 |
| H | -3.302325 | 4.505642 | -4.248908 |
| C | -2.583696 | 4.476665 | -3.434881 |
| C | -2.889709 | 3.774959 | -2.271491 |
| H | -3.834935 | 3.251605 | -2.185868 |
| H | -0.057632 | 4.361291 | -0.502883 |
| C | -1.272311 | 5.689409 | 1.771806  |
| O | -2.263346 | 4.985538 | 2.324593  |
| O | -1.757024 | 6.890462 | 1.428665  |
| C | -0.826866 | 7.739199 | 0.738543  |
| H | -1.332382 | 8.698290 | 0.628114  |
| H | 0.096818  | 7.855038 | 1.311604  |
| H | -0.595777 | 7.318579 | -0.245135 |

### TS12i-C\_NiCu

|                                             | Value         |
|---------------------------------------------|---------------|
| Charge                                      | 1             |
| Electronic Energy, BS1 (a.u.)               | -6284.703438  |
| Thermal and entropic correction, BS1 (a.u.) | 1.537871      |
| Electronic Energy, BS2 (a.u.)               | -10207.209589 |
| Number of Imaginary Frequencies             | 1             |
| Imaginary frequencies (cm-1)                | -75.7i        |

### Molecular Geometry in Cartesian Coordinates

|    |          |           |           |
|----|----------|-----------|-----------|
| Cu | 2.823490 | 0.246504  | -0.036425 |
| Fe | 6.692822 | -1.125043 | -1.285501 |
| P  | 3.851556 | 0.878104  | -1.903335 |
| C  | 5.631435 | 0.614759  | -1.609387 |
| C  | 6.286046 | 0.639132  | -0.316845 |
| C  | 7.700300 | 0.528419  | -0.533617 |
| H  | 8.444535 | 0.489794  | 0.248035  |
| C  | 7.924762 | 0.427074  | -1.931742 |
| H  | 8.884022 | 0.282776  | -2.409010 |
| C  | 6.663244 | 0.477343  | -2.591978 |
| H  | 6.493593 | 0.389468  | -3.655924 |
| C  | 5.404057 | -2.740922 | -1.138424 |
| H  | 4.334465 | -2.643758 | -1.051957 |
| C  | 6.314793 | -2.745148 | -0.042214 |
| H  | 6.050467 | -2.665179 | 1.001989  |
| C  | 7.639769 | -2.821697 | -0.565644 |
| H  | 8.554591 | -2.805242 | 0.010947  |
| C  | 7.546360 | -2.870008 | -1.990325 |
| H  | 8.379044 | -2.893229 | -2.679890 |
| C  | 6.164839 | -2.817348 | -2.344999 |
| H  | 5.762252 | -2.785567 | -3.347802 |
| O  | 6.535868 | 0.895534  | 2.023015  |
| C  | 5.675134 | 0.659992  | 1.006795  |
| N  | 4.442723 | 0.447351  | 1.319914  |
| C  | 4.325839 | 0.561890  | 2.787770  |
| C  | 5.832412 | 0.612020  | 3.263963  |
| H  | 5.988527 | 1.470625  | 3.920972  |

|   |           |           |           |
|---|-----------|-----------|-----------|
| H | 3.858692  | 1.525925  | 3.009716  |
| C | 3.750647  | 2.659744  | -2.333642 |
| C | 4.828191  | 3.372932  | -2.887904 |
| H | 5.772948  | 2.876069  | -3.080662 |
| C | 4.695888  | 4.730445  | -3.179072 |
| H | 5.534807  | 5.272573  | -3.605791 |
| C | 3.496296  | 5.393062  | -2.904948 |
| H | 3.403490  | 6.455643  | -3.109916 |
| C | 2.424922  | 4.696478  | -2.344316 |
| H | 1.510814  | 5.200250  | -2.056798 |
| C | 2.549022  | 3.334306  | -2.067998 |
| H | 1.705121  | 2.818233  | -1.621550 |
| C | 3.582789  | -0.024077 | -3.486051 |
| C | 3.153131  | -1.357700 | -3.414004 |
| H | 2.940722  | -1.794430 | -2.445737 |
| C | 2.979337  | -2.111913 | -4.574150 |
| H | 2.634927  | -3.138808 | -4.499920 |
| C | 3.217052  | -1.532666 | -5.823907 |
| H | 3.077272  | -2.114919 | -6.729877 |
| C | 3.617218  | -0.196337 | -5.906069 |
| H | 3.787105  | 0.262595  | -6.875575 |
| C | 3.799520  | 0.557549  | -4.743345 |
| H | 4.101249  | 1.597652  | -4.816986 |
| C | 3.487706  | -0.535624 | 3.400165  |
| C | 2.737287  | -0.276274 | 4.551466  |
| C | 3.482569  | -1.826620 | 2.860862  |
| C | 2.005296  | -1.294508 | 5.166452  |
| C | 2.749180  | -2.844480 | 3.469999  |
| C | 2.013457  | -2.583765 | 4.629750  |
| H | 2.720603  | 0.729626  | 4.961299  |
| H | 4.037220  | -2.020503 | 1.950535  |
| H | 1.430715  | -1.080629 | 6.063311  |
| H | 2.753707  | -3.842808 | 3.042007  |
| H | 1.445661  | -3.377530 | 5.106050  |
| C | 6.385683  | -0.643379 | 3.899912  |
| C | 6.057205  | -0.937562 | 5.229226  |
| C | 7.190891  | -1.534054 | 3.183606  |
| C | 6.497708  | -2.119918 | 5.820737  |
| C | 7.634798  | -2.717994 | 3.777409  |
| C | 7.283754  | -3.017996 | 5.093759  |
| H | 5.440408  | -0.247524 | 5.797917  |
| H | 7.482094  | -1.293586 | 2.167867  |
| H | 6.231111  | -2.338552 | 6.850382  |
| H | 8.260385  | -3.401715 | 3.210548  |
| H | 7.628949  | -3.938098 | 5.555482  |
| H | -1.106511 | -5.406410 | -4.897707 |
| C | -0.138310 | -3.948922 | -3.634917 |
| C | -0.574173 | -5.235063 | -3.966945 |
| C | -0.326454 | -6.297375 | -3.097228 |
| H | -0.665371 | -7.298210 | -3.346833 |
| C | 0.347905  | -6.073886 | -1.894047 |
| H | 0.526463  | -6.902569 | -1.213427 |
| H | 2.553069  | -4.273179 | -0.389071 |
| C | 1.506929  | -4.553815 | -0.249571 |
| H | 1.452783  | -5.428409 | 0.400337  |
| C | 0.792883  | -4.791312 | -1.557360 |
| H | 0.874754  | -2.723504 | -2.200335 |
| C | 0.545718  | -3.728666 | -2.440320 |
| H | -0.330985 | -3.110969 | -4.296496 |

|    |           |           |           |
|----|-----------|-----------|-----------|
| O  | 0.831018  | -3.491741 | 0.489960  |
| C  | 1.321020  | -2.257241 | 0.396636  |
| C  | -0.510604 | -1.667216 | 2.082859  |
| H  | -1.374921 | -1.017009 | 2.214543  |
| H  | 0.066941  | -1.689405 | 3.008569  |
| H  | -0.889181 | -2.666946 | 1.881160  |
| C  | 0.350551  | -1.196583 | 0.907124  |
| N  | 1.082930  | 0.074420  | 1.061786  |
| C  | 0.709079  | 0.882604  | 1.997000  |
| H  | -0.106616 | 0.598083  | 2.661347  |
| C  | 1.337360  | 2.156538  | 2.322358  |
| C  | 2.154763  | 2.868336  | 1.431272  |
| H  | 2.248392  | 2.541084  | 0.406043  |
| H  | 3.411850  | 4.576336  | 1.132094  |
| C  | 2.812190  | 4.020053  | 1.844414  |
| C  | 2.645016  | 4.490249  | 3.149433  |
| H  | 3.130838  | 5.409762  | 3.458668  |
| C  | 1.809909  | 3.809280  | 4.039361  |
| H  | 1.649986  | 4.196248  | 5.040305  |
| C  | 1.149296  | 2.659682  | 3.623368  |
| H  | 0.491062  | 2.133622  | 4.309503  |
| O  | 2.387189  | -2.000541 | -0.146030 |
| H  | -0.311717 | -1.074034 | 0.036610  |
| Ni | -3.467205 | 1.624135  | 0.025579  |
| P  | -3.688088 | -0.030513 | -1.380301 |
| C  | -6.078207 | 1.077711  | -2.272274 |
| H  | -5.767912 | 1.935525  | -1.681756 |
| C  | -3.621073 | -1.681305 | -0.535816 |
| C  | -2.386372 | -0.538120 | -3.883320 |
| H  | -3.346757 | -0.836434 | -4.288705 |
| C  | -2.280598 | -0.106145 | -2.556616 |
| C  | -5.243447 | -0.048164 | -2.339279 |
| C  | -2.511922 | -2.536694 | -0.786322 |
| H  | -1.782026 | -2.266968 | -1.538719 |
| C  | -5.652454 | -1.168578 | -3.077654 |
| H  | -5.036909 | -2.062877 | -3.095755 |
| C  | -4.449631 | -3.304745 | 1.100605  |
| C  | -4.605641 | -2.073020 | 0.375230  |
| C  | -1.257839 | -0.547462 | -4.707919 |
| H  | -1.355736 | -0.856804 | -5.744583 |
| C  | -3.296997 | -4.122520 | 0.868934  |
| C  | -2.362515 | -3.724738 | -0.115771 |
| H  | -1.516176 | -4.364209 | -0.336944 |
| C  | -1.030961 | 0.311438  | -2.070109 |
| H  | -0.948227 | 0.717354  | -1.065598 |
| C  | -7.698107 | -0.029811 | -3.682592 |
| H  | -8.654112 | -0.027910 | -4.197083 |
| C  | -7.300772 | 1.086061  | -2.942720 |
| H  | -7.944685 | 1.957849  | -2.879692 |
| C  | -6.872625 | -1.154355 | -3.751469 |
| H  | -7.190580 | -2.030146 | -4.307962 |
| C  | -3.127415 | -5.326038 | 1.605975  |
| H  | -2.242045 | -5.927473 | 1.417889  |
| C  | -5.223670 | -4.938377 | 2.740812  |
| H  | -5.972760 | -5.266937 | 3.454907  |
| C  | 0.095609  | 0.272112  | -2.884569 |
| H  | 1.048616  | 0.592763  | -2.482932 |
| C  | -4.063443 | -5.724017 | 2.530925  |
| H  | -3.925911 | -6.643866 | 3.091002  |

|   |            |           |           |
|---|------------|-----------|-----------|
| C | -5.416599  | -3.770382 | 2.038907  |
| H | -6.320470  | -3.193717 | 2.198187  |
| C | -0.014312  | -0.151605 | -4.211583 |
| H | 0.861755   | -0.158514 | -4.850917 |
| P | -4.647773  | 0.910937  | 1.765239  |
| C | -2.665192  | 0.727599  | 3.706563  |
| H | -2.331712  | 1.676359  | 3.298275  |
| C | -6.073551  | -0.138328 | 1.198269  |
| C | -5.814657  | 2.325991  | 3.938425  |
| H | -5.588382  | 1.457293  | 4.548527  |
| C | -5.465639  | 2.343535  | 2.581032  |
| C | -3.789609  | 0.083676  | 3.158670  |
| C | -7.372255  | 0.441695  | 1.293875  |
| H | -7.507321  | 1.360353  | 1.848669  |
| C | -4.215575  | -1.130948 | 3.703364  |
| H | -5.099317  | -1.617064 | 3.313951  |
| C | -7.048216  | -1.957908 | -0.129841 |
| C | -5.911234  | -1.341573 | 0.505952  |
| C | -6.447573  | 3.430056  | 4.512340  |
| H | -6.708370  | 3.412174  | 5.566230  |
| C | -8.331907  | -1.328397 | -0.055081 |
| C | -8.460564  | -0.130095 | 0.685824  |
| H | -9.437245  | 0.338849  | 0.768774  |
| C | -5.764679  | 3.476971  | 1.807018  |
| H | -5.481264  | 3.501829  | 0.757206  |
| C | -2.384017  | -1.088537 | 5.282636  |
| H | -1.832752  | -1.547214 | 6.098032  |
| C | -1.978045  | 0.148367  | 4.771733  |
| H | -1.115652  | 0.653527  | 5.196131  |
| C | -3.503916  | -1.725336 | 4.747952  |
| H | -3.832732  | -2.683107 | 5.139640  |
| C | -9.445526  | -1.913000 | -0.715505 |
| H | -10.409099 | -1.415639 | -0.647280 |
| C | -8.046481  | -3.717467 | -1.495905 |
| H | -7.940913  | -4.642239 | -2.055318 |
| C | -6.400847  | 4.575920  | 2.382236  |
| H | -6.618232  | 5.451042  | 1.777637  |
| C | -9.309967  | -3.084688 | -1.422215 |
| H | -10.166948 | -3.526650 | -1.921208 |
| C | -6.948639  | -3.171265 | -0.871014 |
| H | -5.990686  | -3.668412 | -0.953747 |
| C | -6.741364  | 4.553823  | 3.737425  |
| H | -7.228089  | 5.412934  | 4.188821  |
| H | -3.195058  | 4.000762  | 1.891392  |
| C | -2.413441  | 3.502608  | 1.328254  |
| H | -1.482190  | 3.292105  | 1.844479  |
| O | 0.266360   | 4.795835  | -0.069150 |
| C | -2.440881  | 3.470708  | -0.024013 |
| C | -2.652154  | 3.011302  | -1.200596 |
| C | -2.285163  | 3.270821  | -2.580052 |
| C | -1.054848  | 3.910368  | -2.830112 |
| C | -0.643444  | 4.129038  | -4.142178 |
| H | 0.310837   | 4.613367  | -4.327726 |
| C | -1.446260  | 3.722167  | -5.212649 |
| H | -1.119149  | 3.891855  | -6.234596 |
| H | -3.302845  | 2.789284  | -5.794871 |
| C | -2.673351  | 3.101247  | -4.966423 |
| C | -3.091787  | 2.873425  | -3.656959 |
| H | -4.038957  | 2.381422  | -3.465366 |

|   |           |          |           |
|---|-----------|----------|-----------|
| H | -0.461854 | 4.227763 | -1.976989 |
| C | 0.185494  | 5.364081 | 1.050618  |
| O | -0.395797 | 4.999990 | 2.095783  |
| O | 0.859472  | 6.583824 | 1.216881  |
| C | 1.552094  | 7.085799 | 0.089536  |
| H | 1.922594  | 8.076763 | 0.369135  |
| H | 2.402584  | 6.449982 | -0.188972 |
| H | 0.899073  | 7.176263 | -0.787304 |

### Int2i-C\_NiCu

|                                             |               |
|---------------------------------------------|---------------|
| Charge                                      | 1             |
| Electronic Energy, BS1 (a.u.)               | -6284.760989  |
| Thermal and entropic correction, BS1 (a.u.) | 1.539075      |
| Electronic Energy, BS2 (a.u.)               | -10207.241700 |
| Number of Imaginary Frequencies             | 0             |
| Imaginary frequencies (cm-1)                | None          |

### Molecular Geometry in Cartesian Coordinates

|    |          |           |           |
|----|----------|-----------|-----------|
| Cu | 3.486703 | -0.013330 | 0.371536  |
| Fe | 6.900098 | 1.479564  | -1.652274 |
| P  | 4.049425 | 2.128328  | 0.224954  |
| C  | 5.857771 | 2.170380  | -0.020120 |
| C  | 6.791133 | 1.126899  | 0.360986  |
| C  | 8.115190 | 1.571463  | 0.032224  |
| H  | 9.014945 | 0.991202  | 0.174032  |
| C  | 8.013847 | 2.862111  | -0.549427 |
| H  | 8.834474 | 3.443104  | -0.946640 |
| C  | 6.638786 | 3.231830  | -0.581615 |
| H  | 6.235159 | 4.141820  | -1.001126 |
| C  | 5.596985 | 0.499404  | -2.929869 |
| H  | 4.584691 | 0.231799  | -2.668199 |
| C  | 6.744024 | -0.311619 | -2.691874 |
| H  | 6.743663 | -1.286809 | -2.227810 |
| C  | 7.897255 | 0.410102  | -3.121383 |
| H  | 8.923370 | 0.078745  | -3.038337 |
| C  | 7.460299 | 1.670238  | -3.632889 |
| H  | 8.098687 | 2.461084  | -4.002306 |
| C  | 6.039122 | 1.727303  | -3.512894 |
| H  | 5.409429 | 2.568236  | -3.766900 |
| O  | 7.567749 | -0.887052 | 1.342724  |
| C  | 6.499141 | -0.209883 | 0.860292  |
| N  | 5.368920 | -0.827486 | 0.858363  |
| C  | 5.584305 | -2.154431 | 1.465436  |
| C  | 7.157632 | -2.273742 | 1.508865  |
| H  | 7.482392 | -2.582583 | 2.505075  |
| H  | 5.217236 | -2.109452 | 2.495507  |
| C  | 3.774826 | 3.128852  | 1.741395  |
| C  | 4.763597 | 3.933881  | 2.326636  |
| H  | 5.747510 | 4.008032  | 1.874720  |
| C  | 4.489939 | 4.636158  | 3.502959  |
| H  | 5.261513 | 5.255505  | 3.951118  |
| C  | 3.232209 | 4.539341  | 4.102584  |
| H  | 3.024881 | 5.081462  | 5.020590  |
| C  | 2.246033 | 3.734514  | 3.525524  |
| H  | 1.270973 | 3.637066  | 3.992389  |
| C  | 2.511642 | 3.030571  | 2.350773  |
| H  | 1.744006 | 2.379157  | 1.944611  |

|   |           |           |           |
|---|-----------|-----------|-----------|
| C | 3.458333  | 3.197773  | -1.148858 |
| C | 2.937589  | 2.575956  | -2.291760 |
| H | 2.835810  | 1.496986  | -2.306160 |
| C | 2.538146  | 3.335253  | -3.392220 |
| H | 2.119904  | 2.840242  | -4.263536 |
| C | 2.649592  | 4.727303  | -3.355965 |
| H | 2.335881  | 5.321074  | -4.209261 |
| C | 3.144255  | 5.357317  | -2.209759 |
| H | 3.214283  | 6.440417  | -2.171415 |
| C | 3.542195  | 4.597686  | -1.107147 |
| H | 3.909797  | 5.092424  | -0.212756 |
| C | 4.851336  | -3.256917 | 0.739491  |
| C | 4.426963  | -4.388381 | 1.443445  |
| C | 4.605147  | -3.178207 | -0.635279 |
| C | 3.783799  | -5.436679 | 0.782393  |
| C | 3.954499  | -4.219091 | -1.297047 |
| C | 3.548551  | -5.355550 | -0.592088 |
| H | 4.599812  | -4.446624 | 2.514953  |
| H | 4.898186  | -2.286049 | -1.176040 |
| H | 3.464098  | -6.312430 | 1.339588  |
| H | 3.766574  | -4.144000 | -2.364333 |
| H | 3.047133  | -6.168698 | -1.108477 |
| C | 7.809014  | -3.141072 | 0.454135  |
| C | 7.756408  | -4.534637 | 0.587882  |
| C | 8.449115  | -2.588039 | -0.659113 |
| C | 8.302055  | -5.360212 | -0.393045 |
| C | 8.997824  | -3.415889 | -1.641671 |
| C | 8.919879  | -4.802757 | -1.515731 |
| H | 7.271809  | -4.975844 | 1.453840  |
| H | 8.528970  | -1.511257 | -0.751044 |
| H | 8.247986  | -6.438757 | -0.279693 |
| H | 9.491053  | -2.973532 | -2.502563 |
| H | 9.346238  | -5.446006 | -2.279504 |
| H | -2.844498 | 1.665417  | -5.137254 |
| C | -1.029878 | 1.446152  | -3.992851 |
| C | -2.009917 | 1.014602  | -4.891336 |
| C | -1.914567 | -0.250279 | -5.473645 |
| H | -2.675512 | -0.591620 | -6.168996 |
| C | -0.843654 | -1.086984 | -5.152713 |
| H | -0.780624 | -2.078551 | -5.593674 |
| H | 2.234262  | -1.106881 | -3.871801 |
| C | 1.254294  | -1.585277 | -3.835497 |
| H | 1.271771  | -2.500781 | -4.428982 |
| C | 0.140122  | -0.663526 | -4.253262 |
| H | 0.779937  | 0.942790  | -2.958696 |
| C | 0.039708  | 0.610208  | -3.677675 |
| H | -1.100657 | 2.421124  | -3.524706 |
| O | 1.003885  | -2.028563 | -2.460724 |
| C | 1.708347  | -1.481873 | -1.468763 |
| C | 0.504726  | -3.181226 | 0.024245  |
| H | -0.144786 | -3.198281 | 0.898803  |
| H | 1.285478  | -3.941499 | 0.108686  |
| H | -0.117905 | -3.400036 | -0.841899 |
| C | 1.106517  | -1.779125 | -0.105678 |
| N | 2.057845  | -1.377633 | 0.940408  |
| C | 1.948030  | -1.915556 | 2.100978  |
| H | 1.229869  | -2.713481 | 2.283370  |
| C | 2.766554  | -1.528616 | 3.253984  |
| C | 3.218210  | -0.211992 | 3.425103  |

|    |           |           |           |
|----|-----------|-----------|-----------|
| H  | 2.848337  | 0.556629  | 2.762029  |
| H  | 4.393371  | 1.138284  | 4.608447  |
| C  | 4.063021  | 0.111207  | 4.483868  |
| C  | 4.457581  | -0.879361 | 5.388996  |
| H  | 5.119373  | -0.630869 | 6.213492  |
| C  | 3.971647  | -2.184563 | 5.254366  |
| H  | 4.253884  | -2.947088 | 5.974044  |
| C  | 3.115430  | -2.504633 | 4.201110  |
| H  | 2.734092  | -3.516550 | 4.093569  |
| O  | 2.676862  | -0.753190 | -1.655106 |
| H  | 0.265794  | -1.071653 | -0.005203 |
| Ni | -4.079196 | 0.470254  | 1.803132  |
| P  | -3.926062 | 1.125265  | -0.302325 |
| C  | -6.275929 | 2.605022  | -0.054292 |
| H  | -6.185242 | 2.366928  | 1.001939  |
| C  | -3.818522 | -0.419827 | -1.332446 |
| C  | -2.492486 | 3.382942  | -1.282479 |
| H  | -3.442556 | 3.809535  | -1.579768 |
| C  | -2.429984 | 2.114844  | -0.685460 |
| C  | -5.320362 | 2.109841  | -0.951113 |
| C  | -2.538004 | -0.900716 | -1.718565 |
| H  | -1.662749 | -0.287063 | -1.569107 |
| C  | -5.444384 | 2.393233  | -2.319916 |
| H  | -4.716239 | 1.996805  | -3.021594 |
| C  | -4.809072 | -2.485729 | -2.213218 |
| C  | -4.946112 | -1.208510 | -1.570546 |
| C  | -1.323345 | 4.121152  | -1.472412 |
| H  | -1.383047 | 5.112052  | -1.912935 |
| C  | -3.505215 | -2.961346 | -2.558868 |
| C  | -2.387590 | -2.134509 | -2.298570 |
| H  | -1.397952 | -2.473422 | -2.579999 |
| C  | -1.192025 | 1.619839  | -0.248874 |
| H  | -1.140380 | 0.695450  | 0.317979  |
| C  | -7.463125 | 3.649162  | -1.881712 |
| H  | -8.299734 | 4.237776  | -2.245548 |
| C  | -7.344780 | 3.371642  | -0.518514 |
| H  | -8.088442 | 3.741760  | 0.180735  |
| C  | -6.511242 | 3.161596  | -2.780942 |
| H  | -6.612615 | 3.361823  | -3.842763 |
| C  | -3.361376 | -4.238608 | -3.162659 |
| H  | -2.361510 | -4.584636 | -3.411686 |
| C  | -5.755449 | -4.550333 | -3.099963 |
| H  | -6.621945 | -5.169222 | -3.313184 |
| C  | -0.026243 | 2.345141  | -0.479815 |
| H  | 0.916304  | 1.935167  | -0.135212 |
| C  | -4.461589 | -5.019563 | -3.430688 |
| H  | -4.342905 | -5.993674 | -3.895705 |
| C  | -5.925032 | -3.321096 | -2.504216 |
| H  | -6.921638 | -2.983666 | -2.247036 |
| C  | -0.086397 | 3.597615  | -1.091247 |
| H  | 0.816346  | 4.177267  | -1.239420 |
| P  | -5.529042 | -1.168458 | 1.512813  |
| C  | -3.472251 | -3.037372 | 1.308349  |
| H  | -2.806094 | -2.233150 | 1.616464  |
| C  | -6.741359 | -0.803720 | 0.155482  |
| C  | -6.990066 | -2.573528 | 3.532582  |
| H  | -6.660365 | -3.497302 | 3.070800  |
| C  | -6.599971 | -1.339037 | 3.000362  |
| C  | -4.850422 | -2.821458 | 1.155724  |

|   |            |           |           |
|---|------------|-----------|-----------|
| C | -8.069392  | -0.413709 | 0.482718  |
| H | -8.406704  | -0.460413 | 1.510182  |
| C | -5.682740  | -3.860372 | 0.707742  |
| H | -6.742682  | -3.679921 | 0.554214  |
| C | -7.221300  | -0.325453 | -2.198738 |
| C | -6.322191  | -0.769911 | -1.174364 |
| C | -7.795999  | -2.622601 | 4.673651  |
| H | -8.087956  | -3.585885 | 5.081105  |
| C | -8.539924  | 0.102408  | -1.842421 |
| C | -8.937315  | 0.029361  | -0.485098 |
| H | -9.945574  | 0.330684  | -0.213903 |
| C | -7.020473  | -0.156367 | 3.635833  |
| H | -6.694789  | 0.805364  | 3.245498  |
| C | -3.775165  | -5.333278 | 0.582962  |
| H | -3.354151  | -6.307742 | 0.353251  |
| C | -2.947425  | -4.300310 | 1.024023  |
| H | -1.882930  | -4.472908 | 1.138748  |
| C | -5.145724  | -5.113308 | 0.424516  |
| H | -5.789908  | -5.908018 | 0.061827  |
| C | -9.413173  | 0.588276  | -2.851766 |
| H | -10.409575 | 0.913971  | -2.565714 |
| C | -7.708772  | 0.212498  | -4.524257 |
| H | -7.396800  | 0.256597  | -5.563579 |
| C | -7.831765  | -0.208016 | 4.766977  |
| H | -8.149476  | 0.712822  | 5.246813  |
| C | -9.008664  | 0.644170  | -4.165607 |
| H | -9.684158  | 1.015526  | -4.930334 |
| C | -6.837948  | -0.258568 | -3.568194 |
| H | -5.842045  | -0.576694 | -3.853233 |
| C | -8.221956  | -1.445406 | 5.288513  |
| H | -8.847578  | -1.488981 | 6.174844  |
| H | -4.541183  | -0.289352 | 4.385041  |
| C | -3.662356  | -0.133929 | 3.766747  |
| H | -2.894653  | -0.904667 | 3.799344  |
| O | 0.247035   | 0.828582  | 2.358070  |
| C | -3.261238  | 1.153646  | 3.480802  |
| C | -3.148259  | 2.104469  | 2.659704  |
| C | -2.683115  | 3.424802  | 2.310827  |
| C | -1.308033  | 3.713003  | 2.366878  |
| C | -0.858768  | 4.993440  | 2.052921  |
| H | 0.205349   | 5.206659  | 2.090548  |
| C | -1.765524  | 5.989621  | 1.680992  |
| H | -1.408785  | 6.986399  | 1.437946  |
| H | -3.836992  | 6.470756  | 1.312673  |
| C | -3.131031  | 5.700939  | 1.610119  |
| C | -3.590638  | 4.422155  | 1.915816  |
| H | -4.647641  | 4.185679  | 1.848138  |
| H | -0.620757  | 2.911700  | 2.617996  |
| C | -0.455706  | -0.187142 | 2.536749  |
| O | -1.079794  | -0.883744 | 1.689157  |
| O | -0.587853  | -0.676212 | 3.839458  |
| C | -0.080797  | 0.166847  | 4.873629  |
| H | -0.244566  | -0.371549 | 5.810107  |
| H | 0.984473   | 0.371649  | 4.743192  |
| H | -0.618777  | 1.121699  | 4.900050  |

Int3i-C\_NiCu

Charge

1



|                                             |               |
|---------------------------------------------|---------------|
| Electronic Energy, BS1 (a.u.)               | -6284.759259  |
| Thermal and entropic correction, BS1 (a.u.) | 1.539711      |
| Electronic Energy, BS2 (a.u.)               | -10207.237381 |
| Number of Imaginary Frequencies             | 0             |
| Imaginary frequencies (cm-1)                | None          |

**Molecular Geometry in Cartesian Coordinates**

|    |           |           |           |
|----|-----------|-----------|-----------|
| Cu | 3.787460  | -0.407812 | 0.168337  |
| Fe | 6.689408  | 2.581460  | -0.343519 |
| P  | 3.588581  | 1.708570  | 0.788607  |
| C  | 5.282750  | 2.307367  | 1.123428  |
| C  | 6.449068  | 1.467668  | 1.352826  |
| C  | 7.589585  | 2.323570  | 1.514677  |
| H  | 8.601473  | 1.979828  | 1.669957  |
| C  | 7.153971  | 3.667008  | 1.385979  |
| H  | 7.786980  | 4.543023  | 1.411222  |
| C  | 5.749917  | 3.661876  | 1.152258  |
| H  | 5.141678  | 4.533648  | 0.966224  |
| C  | 5.908303  | 1.878775  | -2.129887 |
| H  | 5.000614  | 1.298944  | -2.205601 |
| C  | 7.210917  | 1.339778  | -1.924238 |
| H  | 7.451419  | 0.292067  | -1.819282 |
| C  | 8.131714  | 2.425236  | -1.823370 |
| H  | 9.192738  | 2.344713  | -1.630061 |
| C  | 7.394521  | 3.640179  | -1.972194 |
| H  | 7.800530  | 4.640466  | -1.908198 |
| C  | 6.019776  | 3.303258  | -2.159152 |
| H  | 5.196086  | 3.996875  | -2.253945 |
| O  | 7.723495  | -0.487371 | 1.787429  |
| C  | 6.557441  | 0.015755  | 1.312402  |
| N  | 5.704522  | -0.834847 | 0.857014  |
| C  | 6.261944  | -2.183785 | 1.075151  |
| C  | 7.776281  | -1.886558 | 1.385417  |
| H  | 8.100393  | -2.454014 | 2.260659  |
| H  | 5.802992  | -2.581396 | 1.986857  |
| C  | 2.670383  | 1.914961  | 2.363587  |
| C  | 3.245638  | 2.364016  | 3.559195  |
| H  | 4.280144  | 2.694309  | 3.577706  |
| C  | 2.485519  | 2.379336  | 4.733690  |
| H  | 2.934171  | 2.729749  | 5.659035  |
| C  | 1.158681  | 1.941758  | 4.720500  |
| H  | 0.579453  | 1.942712  | 5.639749  |
| C  | 0.580325  | 1.492860  | 3.528068  |
| H  | -0.438776 | 1.122047  | 3.491164  |
| C  | 1.332695  | 1.482176  | 2.354605  |
| H  | 0.889803  | 1.110410  | 1.435035  |
| C  | 2.893043  | 3.012346  | -0.298111 |
| C  | 2.642548  | 2.698549  | -1.639016 |
| H  | 2.768152  | 1.678434  | -1.982536 |
| C  | 2.223687  | 3.688351  | -2.530609 |
| H  | 2.018928  | 3.427586  | -3.563383 |
| C  | 2.050185  | 4.998161  | -2.083245 |
| H  | 1.730337  | 5.770638  | -2.776505 |
| C  | 2.254475  | 5.311096  | -0.734053 |
| H  | 2.089734  | 6.324318  | -0.378272 |
| C  | 2.658104  | 4.319717  | 0.159514  |
| H  | 2.787978  | 4.558023  | 1.211489  |
| C  | 5.966639  | -3.132060 | -0.061270 |

|   |           |           |           |
|---|-----------|-----------|-----------|
| C | 5.814457  | -4.498436 | 0.197029  |
| C | 5.836538  | -2.668362 | -1.374283 |
| C | 5.543471  | -5.392004 | -0.840803 |
| C | 5.557100  | -3.556643 | -2.412096 |
| C | 5.412997  | -4.921859 | -2.149947 |
| H | 5.901459  | -4.861980 | 1.217586  |
| H | 5.919232  | -1.606506 | -1.574306 |
| H | 5.430779  | -6.451104 | -0.627814 |
| H | 5.453056  | -3.182011 | -3.426340 |
| H | 5.200404  | -5.614222 | -2.959256 |
| C | 8.758984  | -2.070000 | 0.248888  |
| C | 9.119098  | -3.367433 | -0.139165 |
| C | 9.312089  | -0.979075 | -0.428494 |
| C | 9.990349  | -3.569680 | -1.207517 |
| C | 10.186226 | -1.182341 | -1.499390 |
| C | 10.522973 | -2.476317 | -1.895927 |
| H | 8.702398  | -4.222781 | 0.384274  |
| H | 9.066595  | 0.028363  | -0.113727 |
| H | 10.255157 | -4.580819 | -1.501650 |
| H | 10.606534 | -0.326084 | -2.019232 |
| H | 11.202333 | -2.633892 | -2.728126 |
| H | -1.397080 | 3.659869  | -4.407581 |
| C | -0.627859 | 1.992208  | -3.288680 |
| C | -0.710849 | 2.818309  | -4.407501 |
| C | 0.097674  | 2.561996  | -5.518756 |
| H | 0.041259  | 3.198194  | -6.397343 |
| C | 0.975676  | 1.478356  | -5.504599 |
| H | 1.595221  | 1.275266  | -6.375493 |
| H | 3.074319  | -0.152349 | -4.333708 |
| C | 2.043499  | -0.506513 | -4.423208 |
| H | 1.944835  | -1.066481 | -5.356628 |
| C | 1.059607  | 0.643961  | -4.380425 |
| H | 0.308395  | 0.294697  | -2.375183 |
| C | 0.255866  | 0.909470  | -3.267622 |
| H | -1.240396 | 2.196648  | -2.421211 |
| O | 1.786108  | -1.472753 | -3.378802 |
| C | 2.502192  | -1.394669 | -2.251055 |
| C | 1.699148  | -3.739172 | -1.679989 |
| H | 1.028027  | -4.277415 | -1.006641 |
| H | 2.643643  | -4.286193 | -1.760328 |
| H | 1.222005  | -3.710427 | -2.660452 |
| C | 1.935317  | -2.306756 | -1.182049 |
| N | 2.708621  | -2.146274 | 0.051788  |
| C | 2.630254  | -3.060210 | 0.946127  |
| H | 2.135917  | -4.009661 | 0.735659  |
| C | 3.176897  | -2.919741 | 2.301272  |
| C | 3.187886  | -1.679366 | 2.957860  |
| H | 2.718183  | -0.825058 | 2.487927  |
| H | 3.746935  | -0.591567 | 4.719678  |
| C | 3.754995  | -1.557720 | 4.224171  |
| C | 4.309104  | -2.677600 | 4.852206  |
| H | 4.755208  | -2.583656 | 5.837905  |
| C | 4.260508  | -3.927231 | 4.225138  |
| H | 4.667634  | -4.802226 | 4.722881  |
| C | 3.680844  | -4.051370 | 2.962797  |
| H | 3.642369  | -5.019899 | 2.471342  |
| O | 3.436060  | -0.616450 | -2.099325 |
| H | 0.968577  | -1.823273 | -0.936229 |
| O | -0.095613 | -0.458923 | -0.052588 |

|    |           |           |           |
|----|-----------|-----------|-----------|
| C  | -0.551772 | -0.876329 | 1.035258  |
| O  | -0.016857 | -2.116946 | 1.432847  |
| O  | -1.395355 | -0.351227 | 1.798933  |
| H  | -0.070287 | -1.732901 | 3.484517  |
| C  | -0.300987 | -2.528293 | 2.770227  |
| H  | -1.347907 | -2.824345 | 2.890419  |
| H  | 0.341787  | -3.390000 | 2.965435  |
| Ni | -4.427598 | 0.316337  | 1.855770  |
| P  | -4.455740 | 1.212718  | -0.158684 |
| C  | -6.990740 | 2.267073  | 0.299070  |
| H  | -6.787312 | 2.006759  | 1.334566  |
| C  | -4.065049 | -0.179929 | -1.316753 |
| C  | -3.416113 | 3.622127  | -1.267455 |
| H  | -4.364156 | 3.748529  | -1.774849 |
| C  | -3.175797 | 2.499720  | -0.459824 |
| C  | -6.035894 | 1.968002  | -0.683068 |
| C  | -2.693820 | -0.380363 | -1.626413 |
| H  | -1.942458 | 0.301308  | -1.257471 |
| C  | -6.312349 | 2.273099  | -2.024946 |
| H  | -5.600296 | 2.006213  | -2.799383 |
| C  | -4.601914 | -2.267628 | -2.477985 |
| C  | -5.014256 | -1.127885 | -1.707075 |
| C  | -2.444598 | 4.614728  | -1.394434 |
| H  | -2.646334 | 5.485245  | -2.012083 |
| C  | -3.214662 | -2.440525 | -2.793616 |
| C  | -2.282147 | -1.480178 | -2.336019 |
| H  | -1.225912 | -1.615830 | -2.546777 |
| C  | -1.947604 | 2.382992  | 0.213835  |
| H  | -1.751448 | 1.521812  | 0.847716  |
| C  | -8.458807 | 3.184749  | -1.387556 |
| H  | -9.399997 | 3.650857  | -1.662793 |
| C  | -8.196728 | 2.874941  | -0.051824 |
| H  | -8.932424 | 3.097100  | 0.715247  |
| C  | -7.516534 | 2.881377  | -2.373285 |
| H  | -7.729219 | 3.093960  | -3.415880 |
| C  | -2.802485 | -3.580227 | -3.534396 |
| H  | -1.745244 | -3.695599 | -3.758855 |
| C  | -5.088842 | -4.349477 | -3.651609 |
| H  | -5.807956 | -5.091793 | -3.985072 |
| C  | -0.981458 | 3.379491  | 0.077612  |
| H  | -0.037990 | 3.284857  | 0.603713  |
| C  | -3.717271 | -4.515005 | -3.959910 |
| H  | -3.392638 | -5.380556 | -4.529789 |
| C  | -5.518373 | -3.261540 | -2.926115 |
| H  | -6.570130 | -3.158489 | -2.688481 |
| C  | -1.230250 | 4.498851  | -0.717225 |
| H  | -0.477626 | 5.273119  | -0.808842 |
| P  | -5.596405 | -1.503540 | 1.344167  |
| C  | -3.258836 | -2.910337 | 0.854296  |
| H  | -2.773708 | -2.016869 | 1.230054  |
| C  | -6.856298 | -1.228882 | 0.011736  |
| C  | -6.783945 | -3.321853 | 3.206714  |
| H  | -6.323524 | -4.130348 | 2.650293  |
| C  | -6.602086 | -1.993235 | 2.804200  |
| C  | -4.656615 | -2.970120 | 0.806117  |
| C  | -8.230467 | -1.121275 | 0.359795  |
| H  | -8.544295 | -1.308284 | 1.378932  |
| C  | -5.290179 | -4.105410 | 0.274946  |
| H  | -6.372537 | -4.139294 | 0.191197  |

|   |            |           |           |
|---|------------|-----------|-----------|
| C | -7.429928  | -0.667814 | -2.300172 |
| C | -6.454742  | -1.013473 | -1.307919 |
| C | -7.548192  | -3.612705 | 4.340187  |
| H | -7.679052  | -4.646265 | 4.646477  |
| C | -8.803166  | -0.523625 | -1.921018 |
| C | -9.172326  | -0.774934 | -0.577250 |
| H | -10.217022 | -0.686171 | -0.291732 |
| C | -7.186762  | -0.961730 | 3.561226  |
| H | -7.022631  | 0.073887  | 3.271831  |
| C | -3.128530  | -5.108529 | -0.140696 |
| H | -2.538176  | -5.935009 | -0.525185 |
| C | -2.496557  | -3.978206 | 0.377976  |
| H | -1.414809  | -3.896238 | 0.400788  |
| C | -4.524702  | -5.173626 | -0.187290 |
| H | -5.015788  | -6.044076 | -0.610818 |
| C | -9.758100  | -0.122336 | -2.892801 |
| H | -10.795620 | -0.013172 | -2.588952 |
| C | -8.024223  | -0.024015 | -4.574262 |
| H | -7.731740  | 0.169283  | -5.602049 |
| C | -7.955970  | -1.255412 | 4.685044  |
| H | -8.402507  | -0.449644 | 5.259846  |
| C | -9.379506  | 0.125701  | -4.191990 |
| H | -10.116834 | 0.433002  | -4.927450 |
| C | -7.075546  | -0.410989 | -3.655101 |
| H | -6.040741  | -0.515685 | -3.958783 |
| C | -8.138517  | -2.585282 | 5.076351  |
| H | -8.731299  | -2.816626 | 5.956104  |
| H | -4.606109  | -0.931745 | 4.296702  |
| C | -3.808699  | -0.506853 | 3.694251  |
| H | -2.919623  | -1.115232 | 3.540970  |
| C | -3.663682  | 0.858176  | 3.610676  |
| C | -3.745924  | 1.928653  | 2.941520  |
| C | -3.435833  | 3.335788  | 2.844491  |
| C | -2.280923  | 3.833940  | 3.477187  |
| C | -1.946089  | 5.179894  | 3.367014  |
| H | -1.049071  | 5.550534  | 3.854352  |
| C | -2.753101  | 6.046431  | 2.624686  |
| H | -2.486320  | 7.095138  | 2.533161  |
| H | -4.529804  | 6.227585  | 1.415073  |
| C | -3.902332  | 5.559930  | 1.997555  |
| C | -4.244142  | 4.214359  | 2.105975  |
| H | -5.126893  | 3.833380  | 1.604902  |
| H | -1.644376  | 3.154750  | 4.032456  |

#### TS34i-C\_NiCu

|                                             |               |
|---------------------------------------------|---------------|
| Charge                                      | 1             |
| Electronic Energy, BS1 (a.u.)               | -6284.743587  |
| Thermal and entropic correction, BS1 (a.u.) | 1.535600      |
| Electronic Energy, BS2 (a.u.)               | -10207.220600 |
| Number of Imaginary Frequencies             | 1             |
| Imaginary frequencies (cm-1)                | -1278.0i      |

#### Molecular Geometry in Cartesian Coordinates

|    |          |           |           |
|----|----------|-----------|-----------|
| Cu | 3.777248 | -0.437572 | 0.183745  |
| Fe | 6.614212 | 2.610493  | -0.119645 |
| P  | 3.560943 | 1.598806  | 1.003157  |
| C  | 5.253440 | 2.191998  | 1.355948  |

|   |           |           |           |
|---|-----------|-----------|-----------|
| C | 6.436135  | 1.350389  | 1.477119  |
| C | 7.570271  | 2.204730  | 1.682756  |
| H | 8.589949  | 1.862632  | 1.779582  |
| C | 7.116379  | 3.548598  | 1.684594  |
| H | 7.740430  | 4.427379  | 1.768775  |
| C | 5.706560  | 3.545132  | 1.490510  |
| H | 5.084507  | 4.422075  | 1.398539  |
| C | 5.792725  | 2.044772  | -1.938341 |
| H | 4.891765  | 1.458066  | -2.039704 |
| C | 7.106184  | 1.509115  | -1.810235 |
| H | 7.359416  | 0.459216  | -1.795614 |
| C | 8.017092  | 2.594910  | -1.643613 |
| H | 9.083624  | 2.513006  | -1.484021 |
| C | 7.262319  | 3.807953  | -1.673175 |
| H | 7.658408  | 4.805114  | -1.537473 |
| C | 5.886971  | 3.468270  | -1.852381 |
| H | 5.053545  | 4.156450  | -1.869928 |
| O | 7.748417  | -0.619901 | 1.693400  |
| C | 6.561682  | -0.090835 | 1.301294  |
| N | 5.704899  | -0.907115 | 0.796560  |
| C | 6.280339  | -2.264265 | 0.884132  |
| C | 7.801453  | -1.974312 | 1.156266  |
| H | 8.170083  | -2.616229 | 1.959520  |
| H | 5.863189  | -2.731814 | 1.783058  |
| C | 2.661071  | 1.682829  | 2.600959  |
| C | 3.290192  | 1.841425  | 3.842492  |
| H | 4.356910  | 2.040727  | 3.889752  |
| C | 2.545768  | 1.737428  | 5.022349  |
| H | 3.039117  | 1.866227  | 5.981609  |
| C | 1.176492  | 1.467079  | 4.970987  |
| H | 0.605882  | 1.376549  | 5.890768  |
| C | 0.543570  | 1.306846  | 3.732960  |
| H | -0.514599 | 1.074036  | 3.666703  |
| C | 1.281674  | 1.417898  | 2.556312  |
| H | 0.785961  | 1.279284  | 1.600642  |
| C | 2.824296  | 2.964064  | 0.021871  |
| C | 2.545631  | 2.729568  | -1.331309 |
| H | 2.662669  | 1.731531  | -1.738464 |
| C | 2.126370  | 3.775557  | -2.155976 |
| H | 1.914613  | 3.580591  | -3.201364 |
| C | 1.973980  | 5.058620  | -1.628870 |
| H | 1.664198  | 5.876329  | -2.273560 |
| C | 2.185520  | 5.287064  | -0.264159 |
| H | 2.028316  | 6.277110  | 0.154428  |
| C | 2.598623  | 4.241581  | 0.561638  |
| H | 2.746321  | 4.416404  | 1.623616  |
| C | 5.931094  | -3.128988 | -0.302573 |
| C | 5.799795  | -4.511720 | -0.134769 |
| C | 5.702827  | -2.570830 | -1.564054 |
| C | 5.440935  | -5.326419 | -1.209418 |
| C | 5.330803  | -3.380634 | -2.636625 |
| C | 5.198592  | -4.760451 | -2.463687 |
| H | 5.960867  | -4.948215 | 0.847463  |
| H | 5.768447  | -1.496887 | -1.693784 |
| H | 5.341129  | -6.398570 | -1.066111 |
| H | 5.138218  | -2.931008 | -3.606376 |
| H | 4.909286  | -5.390633 | -3.299634 |
| C | 8.739073  | -2.032635 | -0.031370 |
| C | 9.072155  | -3.279314 | -0.578297 |

|    |           |           |           |
|----|-----------|-----------|-----------|
| C  | 9.285080  | -0.875525 | -0.595305 |
| C  | 9.908735  | -3.363343 | -1.689370 |
| C  | 10.124185 | -0.960380 | -1.709347 |
| C  | 10.433763 | -2.202245 | -2.263086 |
| H  | 8.660920  | -4.186133 | -0.145492 |
| H  | 9.059676  | 0.090758  | -0.159836 |
| H  | 10.151696 | -4.335829 | -2.106928 |
| H  | 10.538145 | -0.052944 | -2.139872 |
| H  | 11.085660 | -2.267955 | -3.128950 |
| H  | -1.191299 | 3.867766  | -4.589886 |
| C  | -0.640837 | 2.085254  | -3.516583 |
| C  | -0.514492 | 3.019859  | -4.542911 |
| C  | 0.493099  | 2.863445  | -5.499729 |
| H  | 0.603872  | 3.587512  | -6.301907 |
| C  | 1.356845  | 1.770232  | -5.430003 |
| H  | 2.132281  | 1.646802  | -6.183008 |
| H  | 3.203030  | -0.038456 | -4.253818 |
| C  | 2.169401  | -0.365112 | -4.398942 |
| H  | 2.103597  | -0.899899 | -5.351224 |
| C  | 1.227251  | 0.822351  | -4.404744 |
| H  | 0.132312  | 0.286762  | -2.627410 |
| C  | 0.229023  | 0.993970  | -3.442111 |
| H  | -1.412968 | 2.209480  | -2.767796 |
| O  | 1.829765  | -1.342164 | -3.402578 |
| C  | 2.453220  | -1.259667 | -2.198896 |
| C  | 1.238839  | -3.442560 | -1.663289 |
| H  | 0.505887  | -3.790299 | -0.927477 |
| H  | 1.969564  | -4.247338 | -1.826130 |
| H  | 0.713229  | -3.272417 | -2.603300 |
| C  | 1.906880  | -2.160202 | -1.199385 |
| N  | 2.682781  | -2.170266 | -0.005689 |
| C  | 2.658882  | -3.177563 | 0.798372  |
| H  | 2.168054  | -4.108503 | 0.511304  |
| C  | 3.255801  | -3.156288 | 2.137377  |
| C  | 3.321190  | -1.978259 | 2.902629  |
| H  | 2.864154  | -1.072187 | 2.523685  |
| H  | 3.974343  | -1.054371 | 4.723997  |
| C  | 3.940350  | -1.975873 | 4.150315  |
| C  | 4.491311  | -3.154305 | 4.663598  |
| H  | 4.976361  | -3.152703 | 5.635255  |
| C  | 4.388950  | -4.342994 | 3.933631  |
| H  | 4.795164  | -5.265916 | 4.337314  |
| C  | 3.763233  | -4.346759 | 2.687327  |
| H  | 3.692088  | -5.268227 | 2.115446  |
| O  | 3.339070  | -0.409671 | -1.997736 |
| H  | 0.843691  | -1.304790 | -0.692142 |
| O  | 0.005018  | -0.582593 | -0.248864 |
| C  | -0.457881 | -0.907490 | 0.913481  |
| O  | 0.051681  | -2.080651 | 1.386337  |
| O  | -1.277868 | -0.258647 | 1.567391  |
| H  | 0.005598  | -1.520463 | 3.395907  |
| C  | -0.207844 | -2.385902 | 2.765351  |
| H  | -1.244121 | -2.704060 | 2.906414  |
| H  | 0.469654  | -3.202571 | 3.013603  |
| Ni | -4.364506 | 0.407255  | 1.789288  |
| P  | -4.473548 | 1.228176  | -0.257465 |
| C  | -7.000387 | 2.275947  | 0.248167  |
| H  | -6.750957 | 2.076969  | 1.287266  |
| C  | -4.082085 | -0.210856 | -1.357469 |

|   |            |           |           |
|---|------------|-----------|-----------|
| C | -3.553017  | 3.628295  | -1.475805 |
| H | -4.528582  | 3.716949  | -1.936674 |
| C | -3.239618  | 2.530803  | -0.659794 |
| C | -6.085461  | 1.929324  | -0.755914 |
| C | -2.715408  | -0.395648 | -1.699965 |
| H | -1.979216  | 0.341601  | -1.416796 |
| C | -6.418853  | 2.159558  | -2.099775 |
| H | -5.734250  | 1.861587  | -2.887392 |
| C | -4.596446  | -2.376696 | -2.378563 |
| C | -5.017682  | -1.200711 | -1.668703 |
| C | -2.618922  | 4.645810  | -1.669778 |
| H | -2.877569  | 5.498029  | -2.291506 |
| C | -3.213068  | -2.539918 | -2.715379 |
| C | -2.293740  | -1.527830 | -2.350386 |
| H | -1.242148  | -1.650053 | -2.589354 |
| C | -1.973773  | 2.462925  | -0.051468 |
| H | -1.724536  | 1.625448  | 0.593191  |
| C | -8.546357  | 3.087304  | -1.423130 |
| H | -9.502494  | 3.530939  | -1.683519 |
| C | -8.225738  | 2.854778  | -0.084458 |
| H | -8.930375  | 3.115325  | 0.699479  |
| C | -7.642975  | 2.737397  | -2.429840 |
| H | -7.900122  | 2.891894  | -3.472617 |
| C | -2.789986  | -3.714831 | -3.392076 |
| H | -1.735455  | -3.822813 | -3.631129 |
| C | -5.061976  | -4.534978 | -3.413027 |
| H | -5.771538  | -5.310430 | -3.685944 |
| C | -1.043824  | 3.480432  | -0.256256 |
| H | -0.069480  | 3.424037  | 0.216600  |
| C | -3.693476  | -4.692368 | -3.738613 |
| H | -3.361861  | -5.584913 | -4.260595 |
| C | -5.500650  | -3.413611 | -2.746209 |
| H | -6.549461  | -3.316744 | -2.493427 |
| C | -1.369762  | 4.578009  | -1.054325 |
| H | -0.648099  | 5.373885  | -1.193973 |
| P | -5.564536  | -1.422721 | 1.399887  |
| C | -3.249563  | -2.889301 | 0.957339  |
| H | -2.749759  | -1.977261 | 1.258658  |
| C | -6.841992  | -1.232282 | 0.074026  |
| C | -6.727277  | -3.094996 | 3.408631  |
| H | -6.286487  | -3.945477 | 2.901040  |
| C | -6.543328  | -1.799752 | 2.909685  |
| C | -4.648724  | -2.931388 | 0.942449  |
| C | -8.213876  | -1.127793 | 0.431463  |
| H | -8.513600  | -1.260943 | 1.463296  |
| C | -5.306566  | -4.090364 | 0.500497  |
| H | -6.390771  | -4.115142 | 0.442097  |
| C | -7.445277  | -0.810877 | -2.258807 |
| C | -6.455693  | -1.086380 | -1.259140 |
| C | -7.468708  | -3.297447 | 4.575971  |
| H | -7.601825  | -4.305404 | 4.957232  |
| C | -8.817320  | -0.669024 | -1.873554 |
| C | -9.170084  | -0.851608 | -0.514231 |
| H | -10.213486 | -0.764332 | -0.223762 |
| C | -7.102592  | -0.711313 | 3.603601  |
| H | -6.938304  | 0.299757  | 3.237702  |
| C | -3.167367  | -5.150584 | 0.110382  |
| H | -2.594405  | -6.008303 | -0.228538 |
| C | -2.510684  | -3.997030 | 0.540330  |

|   |            |           |           |
|---|------------|-----------|-----------|
| H | -1.427499  | -3.939042 | 0.537907  |
| C | -4.564425  | -5.197779 | 0.095038  |
| H | -5.075372  | -6.087683 | -0.258717 |
| C | -9.787763  | -0.334861 | -2.855221 |
| H | -10.824203 | -0.227282 | -2.547313 |
| C | -8.070694  | -0.293597 | -4.556516 |
| H | -7.790905  | -0.148145 | -5.595594 |
| C | -7.848741  | -0.917454 | 4.761902  |
| H | -8.276087  | -0.068933 | 5.287594  |
| C | -9.424876  | -0.146915 | -4.168910 |
| H | -10.173732 | 0.110336  | -4.911821 |
| C | -7.107416  | -0.619017 | -3.628665 |
| H | -6.074162  | -0.723404 | -3.937794 |
| C | -8.033498  | -2.214562 | 5.250176  |
| H | -8.608503  | -2.377321 | 6.156619  |
| H | -4.465208  | -0.743115 | 4.275785  |
| C | -3.681846  | -0.363837 | 3.625871  |
| H | -2.816314  | -1.005708 | 3.477499  |
| C | -3.505838  | 0.993408  | 3.484943  |
| C | -3.602704  | 2.044314  | 2.788374  |
| C | -3.292766  | 3.445370  | 2.630372  |
| C | -2.098306  | 3.956262  | 3.173255  |
| C | -1.771396  | 5.298111  | 3.003610  |
| H | -0.845506  | 5.681278  | 3.422257  |
| C | -2.623941  | 6.145133  | 2.290357  |
| H | -2.362912  | 7.190164  | 2.152594  |
| H | -4.473700  | 6.297418  | 1.191191  |
| C | -3.811444  | 5.644666  | 1.751438  |
| C | -4.146502  | 4.303772  | 1.919534  |
| H | -5.059254  | 3.909533  | 1.486365  |
| H | -1.427049  | 3.291840  | 3.705755  |

#### Int4i-C\_NiCu

|                                             |               |
|---------------------------------------------|---------------|
| Charge                                      | 1             |
| Electronic Energy, BS1 (a.u.)               | -6284.747216  |
| Thermal and entropic correction, BS1 (a.u.) | 1.539250      |
| Electronic Energy, BS2 (a.u.)               | -10207.227303 |
| Number of Imaginary Frequencies             | 0             |
| Imaginary frequencies (cm-1)                | None          |

#### Molecular Geometry in Cartesian Coordinates

xyz

|    |          |           |           |
|----|----------|-----------|-----------|
| Cu | 3.661845 | -0.416810 | 0.195268  |
| Fe | 6.515679 | 2.591100  | -0.084957 |
| P  | 3.477458 | 1.572893  | 1.136216  |
| C  | 5.192956 | 2.141273  | 1.416421  |
| C  | 6.369835 | 1.286997  | 1.480817  |
| C  | 7.517048 | 2.125745  | 1.677407  |
| H  | 8.535893 | 1.772269  | 1.734991  |
| C  | 7.075206 | 3.473009  | 1.729313  |
| H  | 7.709387 | 4.343963  | 1.819285  |
| C  | 5.660444 | 3.486406  | 1.575418  |
| H  | 5.041749 | 4.369437  | 1.527294  |
| C  | 5.636041 | 2.107291  | -1.901884 |
| H  | 4.719307 | 1.546036  | -2.002296 |
| C  | 6.936876 | 1.533111  | -1.822040 |
| H  | 7.160101 | 0.476501  | -1.846778 |



|   |           |           |           |
|---|-----------|-----------|-----------|
| C | 7.881109  | 2.587962  | -1.641477 |
| H | 8.948357  | 2.472616  | -1.509422 |
| C | 7.159342  | 3.821103  | -1.613189 |
| H | 7.585706  | 4.802210  | -1.453958 |
| C | 5.771375  | 3.523799  | -1.770980 |
| H | 4.956802  | 4.234067  | -1.746012 |
| O | 7.656981  | -0.705099 | 1.632069  |
| C | 6.472467  | -0.151077 | 1.268186  |
| N | 5.597076  | -0.941709 | 0.755120  |
| C | 6.154489  | -2.308839 | 0.802973  |
| C | 7.683640  | -2.045092 | 1.058638  |
| H | 8.058202  | -2.713681 | 1.836874  |
| H | 5.742276  | -2.791478 | 1.696529  |
| C | 2.694513  | 1.643129  | 2.797550  |
| C | 3.437631  | 1.532838  | 3.981520  |
| H | 4.523081  | 1.534648  | 3.942484  |
| C | 2.786586  | 1.416359  | 5.212852  |
| H | 3.372199  | 1.339772  | 6.124598  |
| C | 1.391381  | 1.396737  | 5.274080  |
| H | 0.889720  | 1.296499  | 6.232044  |
| C | 0.644526  | 1.506148  | 4.096544  |
| H | -0.440691 | 1.470741  | 4.122284  |
| C | 1.291687  | 1.635373  | 2.868234  |
| H | 0.699852  | 1.718928  | 1.962773  |
| C | 2.715913  | 2.980723  | 0.234702  |
| C | 2.428899  | 2.810742  | -1.127014 |
| H | 2.534717  | 1.830534  | -1.579574 |
| C | 2.023247  | 3.899869  | -1.901578 |
| H | 1.811680  | 3.756084  | -2.955253 |
| C | 1.885414  | 5.159195  | -1.315320 |
| H | 1.590713  | 6.011056  | -1.921884 |
| C | 2.097687  | 5.320979  | 0.058567  |
| H | 1.951700  | 6.292078  | 0.523026  |
| C | 2.505353  | 4.234614  | 0.833444  |
| H | 2.665711  | 4.360619  | 1.900430  |
| C | 5.788637  | -3.147977 | -0.396632 |
| C | 5.690797  | -4.537065 | -0.257531 |
| C | 5.523378  | -2.565984 | -1.639587 |
| C | 5.329758  | -5.334706 | -1.343431 |
| C | 5.147497  | -3.360050 | -2.722859 |
| C | 5.050530  | -4.745851 | -2.579744 |
| H | 5.875249  | -4.991182 | 0.712730  |
| H | 5.556687  | -1.487630 | -1.744804 |
| H | 5.255153  | -6.411745 | -1.222737 |
| H | 4.919348  | -2.892805 | -3.676435 |
| H | 4.758175  | -5.363102 | -3.424294 |
| C | 8.597674  | -2.080718 | -0.147872 |
| C | 8.933239  | -3.317481 | -0.714964 |
| C | 9.112839  | -0.911046 | -0.714973 |
| C | 9.741979  | -3.379890 | -1.847905 |
| C | 9.924148  | -0.974080 | -1.850680 |
| C | 10.236372 | -2.206538 | -2.423784 |
| H | 8.544494  | -4.233503 | -0.280773 |
| H | 8.885538  | 0.048224  | -0.265234 |
| H | 9.987097  | -4.345093 | -2.280854 |
| H | 10.314030 | -0.057035 | -2.283416 |
| H | 10.866600 | -2.255357 | -3.306674 |
| H | -1.133264 | 4.048258  | -4.571325 |
| C | -0.643289 | 2.200115  | -3.582366 |

|    |           |           |           |
|----|-----------|-----------|-----------|
| C  | -0.446718 | 3.208285  | -4.525218 |
| C  | 0.643033  | 3.134462  | -5.398208 |
| H  | 0.808989  | 3.916804  | -6.133413 |
| C  | 1.518374  | 2.049984  | -5.331732 |
| H  | 2.358134  | 1.991305  | -6.020800 |
| H  | 3.284769  | 0.167599  | -4.180387 |
| C  | 2.262764  | -0.158025 | -4.395055 |
| H  | 2.250697  | -0.637170 | -5.379347 |
| C  | 1.318133  | 1.027529  | -4.393732 |
| H  | 0.091647  | 0.347877  | -2.766804 |
| C  | 0.238489  | 1.119204  | -3.512235 |
| H  | -1.481335 | 2.258662  | -2.898689 |
| O  | 1.879157  | -1.188118 | -3.478346 |
| C  | 2.423552  | -1.145143 | -2.221562 |
| C  | 1.240034  | -3.379363 | -1.857605 |
| H  | 0.422156  | -3.678736 | -1.188081 |
| H  | 1.915283  | -4.243085 | -1.956168 |
| H  | 0.818138  | -3.180013 | -2.842685 |
| C  | 1.971574  | -2.166535 | -1.345676 |
| N  | 2.598724  | -2.180479 | -0.102927 |
| C  | 2.566087  | -3.225714 | 0.669830  |
| H  | 2.131205  | -4.160240 | 0.313196  |
| C  | 3.129329  | -3.261874 | 2.016486  |
| C  | 3.252037  | -2.118012 | 2.830189  |
| H  | 2.852049  | -1.173434 | 2.481888  |
| H  | 3.928981  | -1.296931 | 4.690003  |
| C  | 3.854237  | -2.194574 | 4.083461  |
| C  | 4.335312  | -3.416939 | 4.563899  |
| H  | 4.806041  | -3.475138 | 5.540779  |
| C  | 4.181920  | -4.569276 | 3.786523  |
| H  | 4.535894  | -5.526966 | 4.157689  |
| C  | 3.575884  | -4.494315 | 2.533421  |
| H  | 3.472349  | -5.389894 | 1.926082  |
| O  | 3.235795  | -0.230492 | -1.927294 |
| H  | 0.739332  | -0.962976 | -0.438689 |
| O  | 0.069262  | -0.308665 | -0.074164 |
| C  | -0.366523 | -0.614611 | 1.135573  |
| O  | 0.198851  | -1.724638 | 1.631379  |
| O  | -1.202855 | 0.048953  | 1.728838  |
| H  | 0.073743  | -1.179258 | 3.641303  |
| C  | -0.105484 | -2.046748 | 3.004278  |
| H  | -1.141654 | -2.379755 | 3.094442  |
| H  | 0.577815  | -2.853413 | 3.261077  |
| Ni | -4.372431 | 0.481427  | 1.763173  |
| P  | -4.478211 | 1.219228  | -0.320432 |
| C  | -7.050230 | 2.171880  | 0.134325  |
| H  | -6.795546 | 2.030369  | 1.181678  |
| C  | -4.000395 | -0.234646 | -1.368192 |
| C  | -3.658666 | 3.610130  | -1.630779 |
| H  | -4.632601 | 3.636569  | -2.102874 |
| C  | -3.306865 | 2.564232  | -0.764124 |
| C  | -6.117519 | 1.823569  | -0.852915 |
| C  | -2.622076 | -0.362206 | -1.694377 |
| H  | -1.930907 | 0.428840  | -1.442496 |
| C  | -6.454481 | 1.983516  | -2.205905 |
| H  | -5.753440 | 1.685557  | -2.978842 |
| C  | -4.394068 | -2.457825 | -2.320214 |
| C  | -4.880796 | -1.280282 | -1.655925 |
| C  | -2.764547 | 4.655252  | -1.864624 |

|   |            |           |           |
|---|------------|-----------|-----------|
| H | -3.051996  | 5.466400  | -2.527222 |
| C | -3.000566  | -2.565448 | -2.634533 |
| C | -2.136985  | -1.495143 | -2.298610 |
| H | -1.079617  | -1.576126 | -2.530272 |
| C | -2.046004  | 2.579464  | -0.143904 |
| H | -1.771106  | 1.789462  | 0.546618  |
| C | -8.624507  | 2.841117  | -1.573208 |
| H | -9.598546  | 3.229956  | -1.853990 |
| C | -8.298957  | 2.680484  | -0.225130 |
| H | -9.017333  | 2.943151  | 0.545505  |
| C | -7.702159  | 2.490991  | -2.562491 |
| H | -7.961412  | 2.590661  | -3.611394 |
| C | -2.511828  | -3.741433 | -3.263499 |
| H | -1.450936  | -3.806937 | -3.485975 |
| C | -4.741351  | -4.671371 | -3.281342 |
| H | -5.409177  | -5.489255 | -3.535000 |
| C | -1.155424  | 3.622010  | -0.388339 |
| H | -0.184832  | 3.626714  | 0.094444  |
| C | -3.362738  | -4.773473 | -3.584590 |
| H | -2.981243  | -5.666596 | -4.070135 |
| C | -5.242664  | -3.549361 | -2.661184 |
| H | -6.298379  | -3.494656 | -2.425417 |
| C | -1.517492  | 4.665614  | -1.240833 |
| H | -0.824997  | 5.480662  | -1.416791 |
| P | -5.457809  | -1.428592 | 1.412937  |
| C | -3.033082  | -2.737446 | 1.060478  |
| H | -2.611921  | -1.784163 | 1.352693  |
| C | -6.723398  | -1.354063 | 0.064590  |
| C | -6.527634  | -3.131778 | 3.445908  |
| H | -6.013543  | -3.959021 | 2.969760  |
| C | -6.434259  | -1.839803 | 2.914720  |
| C | -4.425431  | -2.878492 | 1.012214  |
| C | -8.104130  | -1.313410 | 0.401455  |
| H | -8.411734  | -1.433052 | 1.432460  |
| C | -4.985915  | -4.093277 | 0.587209  |
| H | -6.063560  | -4.198212 | 0.503487  |
| C | -7.316210  | -1.036754 | -2.287775 |
| C | -6.327641  | -1.227136 | -1.267486 |
| C | -7.274007  | -3.360027 | 4.605428  |
| H | -7.336801  | -4.364843 | 5.012111  |
| C | -8.699057  | -0.957861 | -1.924130 |
| C | -9.060245  | -1.117929 | -0.564160 |
| H | -10.110768 | -1.079336 | -0.289338 |
| C | -7.089276  | -0.779833 | 3.567882  |
| H | -6.997375  | 0.230646  | 3.175788  |
| C | -2.766600  | -5.006948 | 0.279160  |
| H | -2.124881  | -5.829636 | -0.020812 |
| C | -2.204654  | -3.798776 | 0.694308  |
| H | -1.127650  | -3.668726 | 0.718973  |
| C | -4.155693  | -5.154287 | 0.230443  |
| H | -4.592363  | -6.087151 | -0.111561 |
| C | -9.672469  | -0.708547 | -2.927788 |
| H | -10.717418 | -0.648210 | -2.636299 |
| C | -7.936478  | -0.628115 | -4.608548 |
| H | -7.650579  | -0.501110 | -5.648347 |
| C | -7.839931  | -1.012489 | 4.718131  |
| H | -8.342100  | -0.186239 | 5.212133  |
| C | -9.301917  | -0.543181 | -4.242391 |
| H | -10.053113 | -0.351214 | -5.002438 |

|   |           |           |           |
|---|-----------|-----------|-----------|
| C | -6.969990 | -0.870661 | -3.658926 |
| H | -5.928484 | -0.928517 | -3.952233 |
| C | -7.933461 | -2.306744 | 5.239201  |
| H | -8.511838 | -2.489516 | 6.139621  |
| H | -4.518200 | -0.552414 | 4.299010  |
| C | -3.725573 | -0.181118 | 3.656123  |
| H | -2.837328 | -0.803437 | 3.574664  |
| C | -3.582838 | 1.171691  | 3.454677  |
| C | -3.681410 | 2.185656  | 2.706689  |
| C | -3.382063 | 3.580081  | 2.487835  |
| C | -2.181621 | 4.115340  | 2.992902  |
| C | -1.858592 | 5.448493  | 2.760136  |
| H | -0.927788 | 5.850987  | 3.148466  |
| C | -2.721550 | 6.261422  | 2.020194  |
| H | -2.463717 | 7.299342  | 1.832278  |
| H | -4.583763 | 6.363199  | 0.936714  |
| C | -3.914777 | 5.736441  | 1.518104  |
| C | -4.245819 | 4.403969  | 1.749023  |
| H | -5.161673 | 3.987822  | 1.342801  |
| H | -1.503232 | 3.474975  | 3.546212  |

### Int1ii-A\_NiCu

|                                             | Value         |
|---------------------------------------------|---------------|
| Charge                                      | 1             |
| Electronic Energy, BS1 (a.u.)               | -6284.753729  |
| Thermal and entropic correction, BS1 (a.u.) | 1.545787      |
| Electronic Energy, BS2 (a.u.)               | -10207.236843 |
| Number of Imaginary Frequencies             | 0             |
| Imaginary frequencies (cm-1)                | None          |

### Molecular Geometry in Cartesian Coordinates

| xyz |          |           |           |
|-----|----------|-----------|-----------|
| Cu  | 2.874873 | -0.363599 | -0.077219 |
| Fe  | 6.947875 | -1.996587 | 0.850449  |
| P   | 3.500755 | -2.412288 | 0.440901  |
| C   | 5.230750 | -2.630052 | -0.083862 |
| C   | 5.970417 | -1.700347 | -0.926380 |
| C   | 7.263740 | -2.268705 | -1.177958 |
| H   | 8.045522 | -1.790903 | -1.749544 |
| C   | 7.334819 | -3.522198 | -0.514861 |
| H   | 8.199421 | -4.170242 | -0.479785 |
| C   | 6.097603 | -3.745809 | 0.154618  |
| H   | 5.859232 | -4.596296 | 0.776771  |
| C   | 6.452505 | -1.163980 | 2.677261  |
| H   | 5.446332 | -1.090297 | 3.058395  |
| C   | 7.117046 | -0.201343 | 1.859346  |
| H   | 6.699443 | 0.730675  | 1.504984  |
| C   | 8.412752 | -0.711802 | 1.541249  |
| H   | 9.150323 | -0.234505 | 0.910808  |
| C   | 8.545364 | -1.990296 | 2.162858  |
| H   | 9.398496 | -2.649486 | 2.079866  |
| C   | 7.333704 | -2.270194 | 2.863259  |
| H   | 7.103206 | -3.177432 | 3.404119  |
| O   | 6.438037 | 0.184634  | -2.292868 |
| C   | 5.556308 | -0.402879 | -1.451689 |
| N   | 4.454098 | 0.230707  | -1.241610 |
| C   | 4.434376 | 1.400527  | -2.156751 |

|   |           |           |           |
|---|-----------|-----------|-----------|
| C | 5.939912  | 1.531046  | -2.570840 |
| H | 6.010876  | 1.670192  | -3.651261 |
| H | 3.889300  | 1.072300  | -3.044790 |
| C | 2.562257  | -3.655745 | -0.523952 |
| C | 3.113411  | -4.460466 | -1.528856 |
| H | 4.178390  | -4.425940 | -1.736102 |
| C | 2.288331  | -5.313368 | -2.270447 |
| H | 2.720340  | -5.933018 | -3.050790 |
| C | 0.919436  | -5.372418 | -2.005218 |
| H | 0.278673  | -6.033866 | -2.579425 |
| C | 0.367343  | -4.577580 | -0.994456 |
| H | -0.695553 | -4.618123 | -0.785851 |
| C | 1.182625  | -3.718178 | -0.266333 |
| H | 0.746638  | -3.096943 | 0.509030  |
| C | 3.369529  | -3.032468 | 2.160134  |
| C | 3.072151  | -2.104579 | 3.168417  |
| H | 2.936785  | -1.058765 | 2.909769  |
| C | 2.941921  | -2.520909 | 4.494643  |
| H | 2.717714  | -1.792266 | 5.268068  |
| C | 3.087048  | -3.871542 | 4.818463  |
| H | 2.976877  | -4.199289 | 5.847715  |
| C | 3.358888  | -4.806362 | 3.813595  |
| H | 3.454685  | -5.859109 | 4.062192  |
| C | 3.497024  | -4.390749 | 2.488827  |
| H | 3.674137  | -5.125468 | 1.708639  |
| C | 3.686182  | 2.574167  | -1.571560 |
| C | 2.507101  | 2.993749  | -2.200215 |
| C | 4.060294  | 3.176541  | -0.362726 |
| C | 1.696285  | 3.972045  | -1.620530 |
| C | 3.258041  | 4.159355  | 0.213038  |
| C | 2.066057  | 4.550275  | -0.404959 |
| H | 2.198264  | 2.522631  | -3.128327 |
| H | 4.967637  | 2.861579  | 0.139460  |
| H | 0.765945  | 4.255999  | -2.101923 |
| H | 3.546112  | 4.598084  | 1.163191  |
| H | 1.422782  | 5.280734  | 0.075216  |
| C | 6.773020  | 2.557035  | -1.841767 |
| C | 6.651439  | 3.905601  | -2.197429 |
| C | 7.617826  | 2.201058  | -0.785789 |
| C | 7.344318  | 4.886389  | -1.489350 |
| C | 8.310408  | 3.183679  | -0.074900 |
| C | 8.170454  | 4.528735  | -0.420547 |
| H | 5.995813  | 4.190106  | -3.016142 |
| H | 7.742556  | 1.155016  | -0.534585 |
| H | 7.238366  | 5.929710  | -1.770447 |
| H | 8.962764  | 2.896024  | 0.744813  |
| H | 8.708642  | 5.293158  | 0.131494  |
| H | 5.465704  | 0.279749  | -6.215239 |
| C | 3.382053  | 0.543238  | -5.718833 |
| C | 4.634872  | -0.067660 | -5.607965 |
| C | 4.813556  | -1.136098 | -4.724750 |
| H | 5.784586  | -1.612525 | -4.635227 |
| C | 3.741690  | -1.589359 | -3.954034 |
| H | 3.875563  | -2.421651 | -3.269594 |
| H | 1.486108  | -2.473167 | -2.856599 |
| C | 1.350646  | -1.443149 | -3.184797 |
| H | 0.387917  | -1.335492 | -3.686300 |
| C | 2.487101  | -0.975200 | -4.050916 |
| H | 1.340624  | 0.571816  | -5.008195 |

|    |            |           |           |
|----|------------|-----------|-----------|
| C  | 2.312205   | 0.093087  | -4.942813 |
| H  | 3.238061   | 1.367822  | -6.410657 |
| O  | 1.274196   | -0.692326 | -1.927961 |
| C  | 0.525881   | 0.432237  | -1.915172 |
| C  | -0.765938  | -0.075606 | 0.100539  |
| H  | -1.625160  | -0.204443 | -0.559643 |
| H  | -1.130293  | 0.329629  | 1.041287  |
| H  | -0.299820  | -1.046307 | 0.278518  |
| C  | 0.253110   | 0.904174  | -0.496458 |
| H  | -0.185595  | 1.902636  | -0.579087 |
| N  | 1.447048   | 0.935715  | 0.375458  |
| C  | 1.349938   | 1.733338  | 1.384624  |
| H  | 0.458630   | 2.357732  | 1.484885  |
| C  | 2.313842   | 1.873229  | 2.481919  |
| C  | 3.648970   | 1.428088  | 2.438534  |
| H  | 4.039505   | 0.972347  | 1.533688  |
| H  | 5.518803   | 1.286478  | 3.491556  |
| C  | 4.485424   | 1.609239  | 3.537526  |
| C  | 4.005908   | 2.218511  | 4.701618  |
| H  | 4.665472   | 2.353453  | 5.553725  |
| C  | 2.686655   | 2.668385  | 4.754672  |
| H  | 2.310114   | 3.156611  | 5.648359  |
| C  | 1.853326   | 2.510478  | 3.649181  |
| H  | 0.846149   | 2.907916  | 3.667947  |
| Ni | -3.735173  | 1.260378  | 0.714091  |
| P  | -4.648765  | 0.775163  | -1.214204 |
| C  | -7.192211  | 1.164843  | -0.153941 |
| H  | -6.643461  | 1.601874  | 0.675940  |
| C  | -4.050788  | -0.910763 | -1.743541 |
| C  | -5.154423  | 2.405365  | -3.527883 |
| H  | -6.203905  | 2.147782  | -3.444758 |
| C  | -4.219600  | 1.878156  | -2.626565 |
| C  | -6.479608  | 0.661211  | -1.251208 |
| C  | -3.072969  | -1.001588 | -2.775701 |
| H  | -2.767324  | -0.107310 | -3.303435 |
| C  | -7.182162  | 0.079018  | -2.316960 |
| H  | -6.639067  | -0.334584 | -3.161310 |
| C  | -3.852617  | -3.333221 | -1.418314 |
| C  | -4.438696  | -2.066546 | -1.057458 |
| C  | -4.743760  | 3.284761  | -4.532784 |
| H  | -5.480251  | 3.694534  | -5.218097 |
| C  | -2.902838  | -3.402454 | -2.488329 |
| C  | -2.524600  | -2.205184 | -3.141649 |
| H  | -1.813556  | -2.253466 | -3.962441 |
| C  | -2.874345  | 2.263008  | -2.746317 |
| H  | -2.146084  | 1.899943  | -2.031961 |
| C  | -9.275322  | 0.497835  | -1.182437 |
| H  | -10.358266 | 0.423455  | -1.152190 |
| C  | -8.584418  | 1.081964  | -0.118893 |
| H  | -9.126894  | 1.463870  | 0.740892  |
| C  | -8.573311  | 0.000167  | -2.282793 |
| H  | -9.106717  | -0.471238 | -3.102098 |
| C  | -2.392503  | -4.663771 | -2.898632 |
| H  | -1.687374  | -4.691413 | -3.724943 |
| C  | -3.690197  | -5.762104 | -1.185633 |
| H  | -3.992190  | -6.676485 | -0.683951 |
| C  | -2.461023  | 3.114730  | -3.765592 |
| H  | -1.411912  | 3.380383  | -3.841846 |
| C  | -2.775652  | -5.823038 | -2.265202 |

|   |            |           |           |
|---|------------|-----------|-----------|
| H | -2.384808  | -6.782987 | -2.589617 |
| C | -4.220281  | -4.556578 | -0.783239 |
| H | -4.946877  | -4.536524 | 0.020685  |
| C | -3.399071  | 3.635316  | -4.659451 |
| H | -3.085854  | 4.318692  | -5.443369 |
| P | -4.165576  | -0.552811 | 1.895199  |
| C | -1.704158  | -1.089720 | 3.091049  |
| H | -1.793414  | -0.066959 | 3.445463  |
| C | -5.539557  | -1.630859 | 1.235891  |
| C | -4.633578  | -0.931074 | 4.696724  |
| H | -4.163824  | -1.903710 | 4.587829  |
| C | -4.761786  | -0.086096 | 3.583164  |
| C | -2.743202  | -1.650022 | 2.325996  |
| C | -6.690036  | -1.780283 | 2.064891  |
| H | -6.653135  | -1.441053 | 3.091179  |
| C | -2.616025  | -2.970514 | 1.885115  |
| H | -3.412182  | -3.429414 | 1.315734  |
| C | -6.815063  | -2.664187 | -0.592504 |
| C | -5.589867  | -2.093934 | -0.084908 |
| C | -5.105065  | -0.527681 | 5.946625  |
| H | -4.997618  | -1.188698 | 6.801794  |
| C | -7.965491  | -2.755811 | 0.253849  |
| C | -7.858374  | -2.321308 | 1.595048  |
| H | -8.720243  | -2.409423 | 2.251174  |
| C | -5.372287  | 1.166744  | 3.746596  |
| H | -5.442532  | 1.836069  | 2.893236  |
| C | -0.434159  | -3.142697 | 2.929216  |
| H | 0.461725   | -3.712510 | 3.157426  |
| C | -0.562440  | -1.828020 | 3.391131  |
| H | 0.234137   | -1.380933 | 3.977810  |
| C | -1.466291  | -3.710428 | 2.180040  |
| H | -1.384367  | -4.733043 | 1.822575  |
| C | -9.185938  | -3.269664 | -0.260333 |
| H | -10.045091 | -3.324489 | 0.402746  |
| C | -8.149036  | -3.604240 | -2.411210 |
| H | -8.224386  | -3.929076 | -3.444788 |
| C | -5.847746  | 1.567599  | 4.996124  |
| H | -6.311285  | 2.543250  | 5.109000  |
| C | -9.280985  | -3.687524 | -1.566650 |
| H | -10.217658 | -4.079064 | -1.951772 |
| C | -6.954443  | -3.109188 | -1.939857 |
| H | -6.110502  | -3.041175 | -2.613891 |
| C | -5.713897  | 0.720802  | 6.098640  |
| H | -6.077608  | 1.033587  | 7.072962  |
| H | -3.010773  | 2.447673  | 3.927542  |
| C | -2.318372  | 2.807022  | 3.163945  |
| H | -1.337444  | 2.351333  | 3.343863  |
| O | -0.269457  | 4.381217  | 2.276870  |
| C | -2.810705  | 2.504348  | 1.806873  |
| C | -3.059567  | 3.042954  | 0.659962  |
| C | -2.947020  | 4.185260  | -0.226522 |
| C | -1.690684  | 4.749160  | -0.520535 |
| C | -1.582164  | 5.815071  | -1.413542 |
| H | -0.603822  | 6.238163  | -1.630254 |
| C | -2.721314  | 6.338834  | -2.030040 |
| H | -2.635390  | 7.166045  | -2.728306 |
| H | -4.861770  | 6.172876  | -2.233612 |
| C | -3.972218  | 5.782772  | -1.748094 |
| C | -4.084224  | 4.713436  | -0.863400 |

|   |           |          |           |
|---|-----------|----------|-----------|
| H | -5.050195 | 4.259012 | -0.667205 |
| H | -0.809046 | 4.345439 | -0.038866 |
| C | -1.240762 | 4.889864 | 2.816683  |
| O | -2.233732 | 4.242081 | 3.423045  |
| O | -1.464470 | 6.200619 | 2.913200  |
| C | -0.503206 | 7.037873 | 2.246591  |
| H | -0.769512 | 8.058416 | 2.519501  |
| H | 0.512010  | 6.803103 | 2.576569  |
| H | -0.581411 | 6.901724 | 1.164432  |
| O | 0.019065  | 0.922513 | -2.901578 |

### TS12ii-A\_NiCu

|                                             |               |
|---------------------------------------------|---------------|
| Charge                                      | 1             |
| Electronic Energy, BS1 (a.u.)               | -6284.718446  |
| Thermal and entropic correction, BS1 (a.u.) | 1.542539      |
| Electronic Energy, BS2 (a.u.)               | -10207.216594 |
| Number of Imaginary Frequencies             | 1             |
| Imaginary frequencies (cm-1)                | -44.3i        |

### Molecular Geometry in Cartesian Coordinates

xyz

|    |          |           |           |
|----|----------|-----------|-----------|
| Cu | 2.905125 | -0.339948 | -0.086192 |
| Fe | 6.976090 | -2.014185 | 0.711866  |
| P  | 3.531540 | -2.412414 | 0.301450  |
| C  | 5.256487 | -2.605565 | -0.244634 |
| C  | 5.988195 | -1.631997 | -1.043829 |
| C  | 7.281718 | -2.183028 | -1.329637 |
| H  | 8.059024 | -1.674442 | -1.880361 |
| C  | 7.360786 | -3.467888 | -0.729927 |
| H  | 8.228055 | -4.113332 | -0.731163 |
| C  | 6.127911 | -3.729152 | -0.066000 |
| H  | 5.895168 | -4.609764 | 0.515163  |
| C  | 6.488566 | -1.281436 | 2.583636  |
| H  | 5.485438 | -1.232868 | 2.976314  |
| C  | 7.138584 | -0.272207 | 1.812044  |
| H  | 6.709976 | 0.673373  | 1.511185  |
| C  | 8.435631 | -0.754400 | 1.457854  |
| H  | 9.164348 | -0.238740 | 0.847684  |
| C  | 8.583602 | -2.062467 | 2.010666  |
| H  | 9.441477 | -2.709086 | 1.887178  |
| C  | 7.379778 | -2.388521 | 2.704805  |
| H  | 7.161670 | -3.324516 | 3.199940  |
| O  | 6.442865 | 0.318444  | -2.320874 |
| C  | 5.566468 | -0.311215 | -1.503881 |
| N  | 4.463825 | 0.307914  | -1.258267 |
| C  | 4.437892 | 1.522523  | -2.116396 |
| C  | 5.942142 | 1.678211  | -2.523420 |
| H  | 6.012596 | 1.877002  | -3.594582 |
| H  | 3.896524 | 1.232098  | -3.019458 |
| C  | 2.583957 | -3.599373 | -0.727569 |
| C  | 3.129458 | -4.348021 | -1.777958 |
| H  | 4.193779 | -4.302543 | -1.986417 |
| C  | 2.301839 | -5.158674 | -2.562826 |
| H  | 2.731212 | -5.734619 | -3.377342 |
| C  | 0.934034 | -5.233385 | -2.295879 |
| H  | 0.293426 | -5.867162 | -2.901293 |
| C  | 0.386539 | -4.494054 | -1.241401 |



|   |           |           |           |
|---|-----------|-----------|-----------|
| H | -0.675287 | -4.546814 | -1.029394 |
| C | 1.204800  | -3.675254 | -0.470552 |
| H | 0.772628  | -3.095401 | 0.338493  |
| C | 3.399361  | -3.128016 | 1.983277  |
| C | 3.109315  | -2.252948 | 3.040315  |
| H | 2.986343  | -1.192441 | 2.840078  |
| C | 2.976476  | -2.739716 | 4.342406  |
| H | 2.763095  | -2.050381 | 5.154094  |
| C | 3.110205  | -4.107257 | 4.592452  |
| H | 2.999250  | -4.489058 | 5.602880  |
| C | 3.376204  | -4.988574 | 3.538642  |
| H | 3.466858  | -6.053646 | 3.730532  |
| C | 3.518696  | -4.502876 | 2.238258  |
| H | 3.694794  | -5.195227 | 1.419894  |
| C | 3.680390  | 2.662535  | -1.480182 |
| C | 2.496366  | 3.099148  | -2.089015 |
| C | 4.045687  | 3.209038  | -0.242417 |
| C | 1.669597  | 4.031667  | -1.457370 |
| C | 3.223501  | 4.141859  | 0.385645  |
| C | 2.023258  | 4.544911  | -0.208761 |
| H | 2.198288  | 2.674319  | -3.042916 |
| H | 4.958012  | 2.882851  | 0.243576  |
| H | 0.734356  | 4.330333  | -1.923153 |
| H | 3.496201  | 4.527091  | 1.363013  |
| H | 1.351383  | 5.204281  | 0.328188  |
| C | 6.773797  | 2.664044  | -1.739460 |
| C | 6.644988  | 4.030253  | -2.016560 |
| C | 7.623314  | 2.252007  | -0.708120 |
| C | 7.335419  | 4.971841  | -1.255027 |
| C | 8.313572  | 3.195244  | 0.056339  |
| C | 8.166386  | 4.557228  | -0.210846 |
| H | 5.983916  | 4.358368  | -2.814212 |
| H | 7.752422  | 1.193942  | -0.517049 |
| H | 7.222202  | 6.029192  | -1.473890 |
| H | 8.968464  | 2.864042  | 0.857389  |
| H | 8.701262  | 5.291253  | 0.383970  |
| H | 5.413315  | 0.620351  | -6.242222 |
| C | 3.335773  | 0.857860  | -5.709414 |
| C | 4.589611  | 0.242760  | -5.643399 |
| C | 4.779359  | -0.866475 | -4.814446 |
| H | 5.751981  | -1.344655 | -4.758141 |
| C | 3.717149  | -1.356832 | -4.053281 |
| H | 3.860062  | -2.218962 | -3.408960 |
| H | 1.472830  | -2.292898 | -2.974769 |
| C | 1.335862  | -1.247318 | -3.248740 |
| H | 0.368508  | -1.111698 | -3.734905 |
| C | 2.461704  | -0.739274 | -4.105644 |
| H | 1.304118  | 0.852869  | -4.970745 |
| C | 2.275810  | 0.370537  | -4.942563 |
| H | 3.184115  | 1.715916  | -6.357452 |
| O | 1.276486  | -0.561238 | -1.955296 |
| C | 0.527479  | 0.558342  | -1.872811 |
| C | -0.744753 | -0.032362 | 0.122212  |
| H | -1.621110 | -0.100185 | -0.524585 |
| H | -1.069910 | 0.292534  | 1.107187  |
| H | -0.297106 | -1.023711 | 0.213486  |
| C | 0.285186  | 0.968031  | -0.427678 |
| H | -0.134904 | 1.977578  | -0.452214 |
| N | 1.481783  | 0.930032  | 0.435879  |

|    |            |           |           |
|----|------------|-----------|-----------|
| C  | 1.415935   | 1.702259  | 1.470313  |
| H  | 0.580156   | 2.405571  | 1.582077  |
| C  | 2.366785   | 1.733558  | 2.586397  |
| C  | 3.712262   | 1.325089  | 2.511967  |
| H  | 4.126176   | 0.989894  | 1.565613  |
| H  | 5.573116   | 1.118317  | 3.572637  |
| C  | 4.528950   | 1.401486  | 3.637972  |
| C  | 4.013992   | 1.860863  | 4.855436  |
| H  | 4.658881   | 1.917293  | 5.727760  |
| C  | 2.681739   | 2.265461  | 4.937406  |
| H  | 2.276209   | 2.639676  | 5.872460  |
| C  | 1.864581   | 2.222248  | 3.807782  |
| H  | 0.837097   | 2.576160  | 3.877438  |
| Ni | -3.724181  | 1.234703  | 0.812866  |
| P  | -4.635370  | 0.818432  | -1.126427 |
| C  | -7.123962  | 1.394378  | -0.025719 |
| H  | -6.538949  | 1.836092  | 0.776257  |
| C  | -4.067300  | -0.865192 | -1.680552 |
| C  | -5.082281  | 2.367238  | -3.488984 |
| H  | -6.124508  | 2.074598  | -3.445260 |
| C  | -4.172398  | 1.919495  | -2.521122 |
| C  | -6.463643  | 0.795324  | -1.108254 |
| C  | -3.050627  | -0.929237 | -2.678064 |
| H  | -2.684289  | -0.019042 | -3.134430 |
| C  | -7.217356  | 0.216381  | -2.140382 |
| H  | -6.716853  | -0.270970 | -2.970818 |
| C  | -3.977687  | -3.308055 | -1.502470 |
| C  | -4.522275  | -2.041708 | -1.079449 |
| C  | -4.655668  | 3.222248  | -4.506190 |
| H  | -5.370865  | 3.573670  | -5.244002 |
| C  | -2.986368  | -3.348100 | -2.534360 |
| C  | -2.532897  | -2.129516 | -3.093191 |
| H  | -1.780216  | -2.155807 | -3.876329 |
| C  | -2.838532  | 2.348530  | -2.588904 |
| H  | -2.130256  | 2.037780  | -1.831413 |
| C  | -9.260847  | 0.828852  | -1.003185 |
| H  | -10.345729 | 0.833555  | -0.959577 |
| C  | -8.517938  | 1.410581  | 0.026055  |
| H  | -9.021174  | 1.870760  | 0.870948  |
| C  | -8.609738  | 0.234222  | -2.086589 |
| H  | -9.184097  | -0.235885 | -2.878141 |
| C  | -2.494327  | -4.600244 | -2.992332 |
| H  | -1.754052  | -4.604350 | -3.787301 |
| C  | -3.896783  | -5.748503 | -1.398445 |
| H  | -4.244800  | -6.678898 | -0.960320 |
| C  | -2.409975  | 3.182952  | -3.616454 |
| H  | -1.368964  | 3.484607  | -3.652535 |
| C  | -2.934937  | -5.778875 | -2.437456 |
| H  | -2.553505  | -6.731083 | -2.793604 |
| C  | -4.410627  | -4.551325 | -0.953111 |
| H  | -5.166357  | -4.553314 | -0.176486 |
| C  | -3.322026  | 3.629094  | -4.574270 |
| H  | -2.997486  | 4.297618  | -5.366063 |
| P  | -4.144776  | -0.685944 | 1.914079  |
| C  | -1.686757  | -1.403930 | 3.034251  |
| H  | -1.728970  | -0.423277 | 3.493952  |
| C  | -5.584339  | -1.645985 | 1.223486  |
| C  | -4.548270  | -1.118127 | 4.704267  |
| H  | -4.083804  | -2.088749 | 4.563081  |

|   |            |           |           |
|---|------------|-----------|-----------|
| C | -4.697897  | -0.244888 | 3.616323  |
| C | -2.756602  | -1.854497 | 2.239923  |
| C | -6.727003  | -1.770158 | 2.066822  |
| H | -6.662101  | -1.464906 | 3.102144  |
| C | -2.696266  | -3.141577 | 1.696726  |
| H | -3.522929  | -3.525026 | 1.117315  |
| C | -6.921192  | -2.574178 | -0.614860 |
| C | -5.669858  | -2.067406 | -0.108076 |
| C | -4.989588  | -0.740556 | 5.973279  |
| H | -4.863964  | -1.420790 | 6.810331  |
| C | -8.063481  | -2.640794 | 0.244713  |
| C | -7.921989  | -2.249289 | 1.596192  |
| H | -8.778296  | -2.321078 | 2.261192  |
| C | -5.301912  | 1.006001  | 3.820976  |
| H | -5.401571  | 1.697570  | 2.988094  |
| C | -0.505555  | -3.485058 | 2.675447  |
| H | 0.371577   | -4.105210 | 2.835708  |
| C | -0.572822  | -2.211428 | 3.249783  |
| H | 0.247901   | -1.848763 | 3.859653  |
| C | -1.574237  | -3.948892 | 1.906390  |
| H | -1.545096  | -4.942269 | 1.468097  |
| C | -9.311202  | -3.085960 | -0.268023 |
| H | -10.164159 | -3.124087 | 0.403896  |
| C | -8.314722  | -3.401554 | -2.442130 |
| H | -8.416590  | -3.694625 | -3.482781 |
| C | -5.744374  | 1.380145  | 5.089397  |
| H | -6.197302  | 2.355757  | 5.236544  |
| C | -9.439403  | -3.458956 | -1.585149 |
| H | -10.396671 | -3.797592 | -1.969428 |
| C | -7.093537  | -2.974600 | -1.972199 |
| H | -6.253516  | -2.927876 | -2.653204 |
| C | -5.587149  | 0.506785  | 6.168190  |
| H | -5.922696  | 0.800197  | 7.158171  |
| H | -2.812857  | 2.016002  | 3.729844  |
| C | -2.228904  | 2.110932  | 2.823568  |
| H | -1.251438  | 1.650619  | 2.804299  |
| O | -0.160909  | 4.284869  | 1.985971  |
| C | -2.695896  | 2.771617  | 1.746898  |
| C | -3.256233  | 3.128592  | 0.651424  |
| C | -3.317627  | 4.292429  | -0.216964 |
| C | -2.156900  | 5.069699  | -0.396798 |
| C | -2.181504  | 6.157597  | -1.266697 |
| H | -1.284596  | 6.756404  | -1.401059 |
| C | -3.351802  | 6.483951  | -1.958959 |
| H | -3.364533  | 7.329526  | -2.640551 |
| H | -5.419776  | 5.974423  | -2.302730 |
| C | -4.508525  | 5.723658  | -1.768347 |
| C | -4.492829  | 4.632218  | -0.902945 |
| H | -5.382535  | 4.025322  | -0.766935 |
| H | -1.266732  | 4.816798  | 0.172291  |
| C | -0.595923  | 4.521535  | 3.143004  |
| O | -0.939307  | 3.687546  | 4.025514  |
| O | -0.735530  | 5.834362  | 3.541109  |
| C | -0.342690  | 6.823276  | 2.595597  |
| H | -0.487880  | 7.787312  | 3.089047  |
| H | 0.709808   | 6.712887  | 2.308686  |
| H | -0.954740  | 6.779800  | 1.687663  |
| O | -0.010843  | 1.084749  | -2.824651 |

**Int2ii-A\_NiCu**

|                                             |               |
|---------------------------------------------|---------------|
| Charge                                      | 1             |
| Electronic Energy, BS1 (a.u.)               | -6284.736646  |
| Thermal and entropic correction, BS1 (a.u.) | 1.541198      |
| Electronic Energy, BS2 (a.u.)               | -10207.227850 |
| Number of Imaginary Frequencies             | 0             |
| Imaginary frequencies (cm-1)                | None          |

**Molecular Geometry in Cartesian Coordinates**

|    |           |           |           |
|----|-----------|-----------|-----------|
| Cu | 3.050672  | -0.223768 | -0.083937 |
| Fe | 7.124268  | -1.921123 | 0.623179  |
| P  | 3.703352  | -2.323283 | 0.085187  |
| C  | 5.443412  | -2.442227 | -0.435566 |
| C  | 6.179268  | -1.385922 | -1.114943 |
| C  | 7.489024  | -1.886192 | -1.416902 |
| H  | 8.271707  | -1.313812 | -1.892243 |
| C  | 7.575240  | -3.221609 | -0.941390 |
| H  | 8.453428  | -3.850918 | -0.980500 |
| C  | 6.329610  | -3.564928 | -0.341548 |
| H  | 6.098009  | -4.501097 | 0.145283  |
| C  | 6.562481  | -1.367772 | 2.534006  |
| H  | 5.545818  | -1.368348 | 2.892944  |
| C  | 7.224853  | -0.284269 | 1.882860  |
| H  | 6.792423  | 0.680391  | 1.656168  |
| C  | 8.539847  | -0.719428 | 1.533857  |
| H  | 9.283240  | -0.142485 | 1.001277  |
| C  | 8.686287  | -2.071535 | 1.969047  |
| H  | 9.556695  | -2.695022 | 1.817588  |
| C  | 7.463497  | -2.472717 | 2.586082  |
| H  | 7.239693  | -3.452545 | 2.984388  |
| O  | 6.629593  | 0.695011  | -2.165464 |
| C  | 5.752006  | -0.025686 | -1.430884 |
| N  | 4.649717  | 0.556856  | -1.112725 |
| C  | 4.632033  | 1.884298  | -1.779056 |
| C  | 6.130074  | 2.068199  | -2.212981 |
| H  | 6.168758  | 2.374906  | -3.260030 |
| H  | 4.046218  | 1.752626  | -2.691911 |
| C  | 2.792648  | -3.385696 | -1.099605 |
| C  | 3.378199  | -4.055259 | -2.180989 |
| H  | 4.451146  | -4.007019 | -2.338403 |
| C  | 2.577465  | -4.786644 | -3.065212 |
| H  | 3.035750  | -5.298729 | -3.906239 |
| C  | 1.198767  | -4.863959 | -2.864294 |
| H  | 0.578126  | -5.432309 | -3.549434 |
| C  | 0.611275  | -4.203215 | -1.779604 |
| H  | -0.459585 | -4.256180 | -1.620269 |
| C  | 1.402001  | -3.456638 | -0.913178 |
| H  | 0.939632  | -2.920181 | -0.091303 |
| C  | 3.555187  | -3.264935 | 1.653266  |
| C  | 3.241714  | -2.554073 | 2.820565  |
| H  | 3.104326  | -1.477853 | 2.772318  |
| C  | 3.094218  | -3.223414 | 4.037256  |
| H  | 2.857114  | -2.661093 | 4.935605  |
| C  | 3.239945  | -4.611183 | 4.092090  |
| H  | 3.118092  | -5.134375 | 5.035720  |
| C  | 3.529059  | -5.329845 | 2.927157  |
| H  | 3.627127  | -6.410759 | 2.965312  |

|   |           |           |           |
|---|-----------|-----------|-----------|
| C | 3.682967  | -4.661438 | 1.711971  |
| H | 3.873779  | -5.228256 | 0.805201  |
| C | 3.942075  | 2.928167  | -0.933650 |
| C | 2.734380  | 3.473641  | -1.388862 |
| C | 4.400793  | 3.269441  | 0.345631  |
| C | 1.978734  | 4.316179  | -0.570878 |
| C | 3.659187  | 4.127379  | 1.154370  |
| C | 2.436539  | 4.636373  | 0.708901  |
| H | 2.358454  | 3.196145  | -2.370518 |
| H | 5.325632  | 2.845819  | 0.719786  |
| H | 1.006298  | 4.672150  | -0.891924 |
| H | 4.012712  | 4.359400  | 2.154313  |
| H | 1.825120  | 5.243202  | 1.368736  |
| C | 6.998696  | 2.964069  | -1.363635 |
| C | 6.876930  | 4.351935  | -1.498744 |
| C | 7.877782  | 2.443698  | -0.408766 |
| C | 7.605135  | 5.206993  | -0.673176 |
| C | 8.606432  | 3.300147  | 0.419345  |
| C | 8.467674  | 4.683195  | 0.293439  |
| H | 6.191651  | 4.763455  | -2.235019 |
| H | 7.995347  | 1.370344  | -0.324154 |
| H | 7.496893  | 6.281849  | -0.781536 |
| H | 9.283792  | 2.885365  | 1.160633  |
| H | 9.032544  | 5.349650  | 0.938072  |
| H | 5.585201  | 1.547485  | -5.983044 |
| C | 3.508171  | 1.678317  | -5.411767 |
| C | 4.770620  | 1.077854  | -5.439216 |
| C | 4.980862  | -0.133911 | -4.775347 |
| H | 5.960578  | -0.600575 | -4.790281 |
| C | 3.930065  | -0.741772 | -4.086356 |
| H | 4.088597  | -1.683939 | -3.569432 |
| H | 1.726990  | -1.852367 | -3.120986 |
| C | 1.548005  | -0.790105 | -3.278121 |
| H | 0.586717  | -0.644263 | -3.770149 |
| C | 2.665140  | -0.143257 | -4.048710 |
| H | 1.478966  | 1.536067  | -4.678783 |
| C | 2.458946  | 1.071644  | -4.718868 |
| H | 3.340736  | 2.617107  | -5.931349 |
| O | 1.436805  | -0.248391 | -1.922785 |
| C | 0.624107  | 0.821771  | -1.743519 |
| C | -0.741080 | 0.315485  | 0.237475  |
| H | -1.585773 | 0.351221  | -0.450527 |
| H | -1.065865 | 0.716639  | 1.199369  |
| H | -0.432352 | -0.724816 | 0.357031  |
| C | 0.423941  | 1.175084  | -0.282085 |
| H | 0.121692  | 2.227123  | -0.256241 |
| N | 1.621379  | 0.967338  | 0.573702  |
| C | 1.532851  | 1.595445  | 1.698772  |
| H | 0.633929  | 2.189520  | 1.893744  |
| C | 2.479958  | 1.608111  | 2.814058  |
| C | 3.780644  | 1.071670  | 2.803991  |
| H | 4.163116  | 0.595943  | 1.904924  |
| H | 5.606235  | 0.798594  | 3.909910  |
| C | 4.597121  | 1.195521  | 3.925504  |
| C | 4.129868  | 1.850850  | 5.070724  |
| H | 4.775643  | 1.947308  | 5.938811  |
| C | 2.844576  | 2.394719  | 5.087746  |
| H | 2.484755  | 2.919305  | 5.967711  |
| C | 2.025727  | 2.282768  | 3.965233  |

|    |            |           |           |
|----|------------|-----------|-----------|
| H  | 1.037846   | 2.739116  | 3.945202  |
| Ni | -3.998742  | 0.919814  | 1.352792  |
| P  | -4.698333  | 0.894141  | -0.766868 |
| C  | -7.310807  | 0.884091  | 0.179368  |
| H  | -6.842217  | 1.131513  | 1.127785  |
| C  | -3.920957  | -0.530575 | -1.674970 |
| C  | -4.967763  | 2.879641  | -2.803117 |
| H  | -5.965276  | 2.504676  | -2.999906 |
| C  | -4.194449  | 2.345549  | -1.761276 |
| C  | -6.506421  | 0.701139  | -0.955155 |
| C  | -2.915045  | -0.253390 | -2.644632 |
| H  | -2.638983  | 0.769714  | -2.863514 |
| C  | -7.107764  | 0.360598  | -2.175564 |
| H  | -6.493709  | 0.179005  | -3.051846 |
| C  | -3.563272  | -2.926177 | -2.049573 |
| C  | -4.243923  | -1.853938 | -1.370711 |
| C  | -4.457935  | 3.916574  | -3.583742 |
| H  | -5.064629  | 4.332293  | -4.382952 |
| C  | -2.600479  | -2.622502 | -3.065577 |
| C  | -2.289290  | -1.266441 | -3.326384 |
| H  | -1.562430  | -1.026960 | -4.096409 |
| C  | -2.930451  | 2.888460  | -1.490468 |
| H  | -2.347089  | 2.567747  | -0.635035 |
| C  | -9.285372  | 0.396744  | -1.124725 |
| H  | -10.361689 | 0.269875  | -1.190416 |
| C  | -8.694169  | 0.732178  | 0.095415  |
| H  | -9.307748  | 0.867227  | 0.981132  |
| C  | -8.491599  | 0.213243  | -2.258807 |
| H  | -8.946340  | -0.068858 | -3.202865 |
| C  | -2.011027  | -3.677605 | -3.813575 |
| H  | -1.292905  | -3.425151 | -4.588677 |
| C  | -3.257836  | -5.301157 | -2.531559 |
| H  | -3.506683  | -6.338171 | -2.327847 |
| C  | -2.417423  | 3.911088  | -2.287058 |
| H  | -1.446512  | 4.319599  | -2.034839 |
| C  | -2.338374  | -4.989730 | -3.562477 |
| H  | -1.894406  | -5.788752 | -4.148647 |
| C  | -3.856930  | -4.299045 | -1.801640 |
| H  | -4.586407  | -4.556292 | -1.042403 |
| C  | -3.175965  | 4.418772  | -3.340837 |
| H  | -2.783652  | 5.221819  | -3.958357 |
| P  | -4.143450  | -1.203568 | 1.882680  |
| C  | -1.539212  | -1.675163 | 2.701096  |
| H  | -1.641001  | -0.709934 | 3.186149  |
| C  | -5.430222  | -2.117282 | 0.890261  |
| C  | -4.399208  | -2.415009 | 4.448599  |
| H  | -3.678073  | -3.151317 | 4.109824  |
| C  | -4.783556  | -1.365181 | 3.604309  |
| C  | -2.599985  | -2.189315 | 1.936167  |
| C  | -6.578606  | -2.571517 | 1.604703  |
| H  | -6.586040  | -2.537578 | 2.684630  |
| C  | -2.455802  | -3.430533 | 1.306563  |
| H  | -3.271421  | -3.844127 | 0.727577  |
| C  | -6.581558  | -2.708336 | -1.196916 |
| C  | -5.415459  | -2.216890 | -0.504338 |
| C  | -4.942674  | -2.518006 | 5.731403  |
| H  | -4.634626  | -3.332064 | 6.380666  |
| C  | -7.739562  | -3.101176 | -0.453791 |
| C  | -7.690629  | -3.045053 | 0.958182  |

|   |           |           |           |
|---|-----------|-----------|-----------|
| H | -8.551887 | -3.375608 | 1.532310  |
| C | -5.723762 | -0.426419 | 4.061178  |
| H | -6.016947 | 0.396025  | 3.413570  |
| C | -0.210316 | -3.632136 | 2.195858  |
| H | 0.718907  | -4.184923 | 2.294895  |
| C | -0.354655 | -2.395508 | 2.832937  |
| H | 0.462034  | -1.991263 | 3.421318  |
| C | -1.260461 | -4.143959 | 1.430074  |
| H | -1.154286 | -5.100966 | 0.928114  |
| C | -8.906294 | -3.537572 | -1.136410 |
| H | -9.773162 | -3.827660 | -0.549165 |
| C | -7.797932 | -3.210562 | -3.254018 |
| H | -7.825653 | -3.251037 | -4.338806 |
| C | -6.269877 | -0.535545 | 5.338234  |
| H | -6.992034 | 0.198985  | 5.681557  |
| C | -8.939219 | -3.592540 | -2.509771 |
| H | -9.834464 | -3.927673 | -3.024538 |
| C | -6.654512 | -2.782850 | -2.618792 |
| H | -5.801848 | -2.482547 | -3.213668 |
| C | -5.877185 | -1.582415 | 6.177436  |
| H | -6.295793 | -1.664683 | 7.175858  |
| H | -3.737444 | 1.155499  | 4.056484  |
| C | -3.262225 | 1.578166  | 3.176090  |
| H | -2.174403 | 1.637349  | 3.194841  |
| O | -1.059446 | 4.166872  | 0.448152  |
| C | -3.875600 | 2.669152  | 2.554016  |
| C | -4.470576 | 3.333098  | 1.689689  |
| C | -5.069875 | 4.318081  | 0.854395  |
| C | -4.249352 | 5.229297  | 0.159631  |
| C | -4.833088 | 6.176271  | -0.676534 |
| H | -4.199650 | 6.868893  | -1.221744 |
| C | -6.221207 | 6.226342  | -0.829847 |
| H | -6.668014 | 6.966500  | -1.487236 |
| H | -8.116112 | 5.358227  | -0.266546 |
| C | -7.037921 | 5.321301  | -0.144168 |
| C | -6.469056 | 4.368630  | 0.694395  |
| H | -7.093487 | 3.656213  | 1.222812  |
| H | -3.171727 | 5.148638  | 0.259549  |
| C | -0.853066 | 4.172239  | 1.687104  |
| O | -0.817109 | 3.201593  | 2.482958  |
| O | -0.595062 | 5.397012  | 2.301965  |
| C | -0.726129 | 6.556120  | 1.486153  |
| H | -0.409707 | 7.399710  | 2.105016  |
| H | -0.102156 | 6.500725  | 0.587731  |
| H | -1.764202 | 6.713226  | 1.170112  |
| O | 0.028529  | 1.369388  | -2.647913 |

### Int3ii-A\_NiCu

|                                             |               |
|---------------------------------------------|---------------|
| Charge                                      | 1             |
| Electronic Energy, BS1 (a.u.)               | -6284.750164  |
| Thermal and entropic correction, BS1 (a.u.) | 1.539648      |
| Electronic Energy, BS2 (a.u.)               | -10207.230602 |
| Number of Imaginary Frequencies             | 0             |
| Imaginary frequencies (cm-1)                | None          |

### Molecular Geometry in Cartesian Coordinates

|    |           |          |          |
|----|-----------|----------|----------|
| Ni | -4.307092 | 1.031961 | 1.557478 |
|----|-----------|----------|----------|

|   |            |           |           |
|---|------------|-----------|-----------|
| P | -4.499816  | 1.014431  | -0.645777 |
| C | -7.049648  | 2.098746  | -0.426203 |
| H | -6.744068  | 2.311986  | 0.595032  |
| C | -4.063390  | -0.707607 | -1.172797 |
| C | -3.746516  | 2.826958  | -2.715991 |
| H | -4.732118  | 2.693103  | -3.144202 |
| C | -3.357929  | 2.119876  | -1.567763 |
| C | -6.163595  | 1.427337  | -1.280756 |
| C | -2.696723  | -0.950759 | -1.482453 |
| H | -1.972577  | -0.147185 | -1.485755 |
| C | -6.564733  | 1.132896  | -2.592869 |
| H | -5.900440  | 0.584172  | -3.252667 |
| C | -4.502711  | -3.112010 | -1.350546 |
| C | -4.956029  | -1.777360 | -1.072804 |
| C | -2.879173  | 3.755103  | -3.293197 |
| H | -3.195889  | 4.311218  | -4.170662 |
| C | -3.128703  | -3.331034 | -1.687646 |
| C | -2.246278  | -2.224935 | -1.722934 |
| H | -1.195790  | -2.388396 | -1.936291 |
| C | -2.083998  | 2.335529  | -1.020442 |
| H | -1.781360  | 1.797726  | -0.125529 |
| C | -8.704606  | 2.181543  | -2.186171 |
| H | -9.691843  | 2.467318  | -2.536371 |
| C | -8.315035  | 2.475580  | -0.878240 |
| H | -8.996588  | 2.990500  | -0.207841 |
| C | -7.828856  | 1.509152  | -3.042212 |
| H | -8.137561  | 1.256381  | -4.051328 |
| C | -2.677270  | -4.649506 | -1.962707 |
| H | -1.637100  | -4.791196 | -2.242081 |
| C | -4.894694  | -5.511213 | -1.547656 |
| H | -5.571346  | -6.358653 | -1.490101 |
| C | -1.226601  | 3.265019  | -1.602315 |
| H | -0.258642  | 3.449602  | -1.153361 |
| C | -3.538870  | -5.719745 | -1.896505 |
| H | -3.184706  | -6.723421 | -2.112152 |
| C | -5.363413  | -4.244582 | -1.281141 |
| H | -6.403472  | -4.104938 | -1.012894 |
| C | -1.626133  | 3.988901  | -2.725239 |
| H | -0.969355  | 4.741679  | -3.150006 |
| P | -5.364729  | -0.895145 | 1.906465  |
| C | -2.918789  | -2.188654 | 1.934673  |
| H | -2.514118  | -1.183345 | 1.910133  |
| C | -6.699632  | -1.265064 | 0.673269  |
| C | -6.332738  | -1.909610 | 4.398559  |
| H | -5.828758  | -2.841475 | 4.168040  |
| C | -6.269877  | -0.832647 | 3.506401  |
| C | -4.305358  | -2.380799 | 1.941689  |
| C | -8.061352  | -1.102027 | 1.049839  |
| H | -8.312711  | -0.875582 | 2.077995  |
| C | -4.829439  | -3.683304 | 1.919451  |
| H | -5.903361  | -3.840715 | 1.881699  |
| C | -7.424196  | -1.726981 | -1.618875 |
| C | -6.379532  | -1.583868 | -0.647067 |
| C | -7.034216  | -1.783756 | 5.600889  |
| H | -7.072610  | -2.623287 | 6.288562  |
| C | -8.785552  | -1.518054 | -1.228213 |
| C | -9.070353  | -1.220864 | 0.126686  |
| H | -10.104440 | -1.082262 | 0.430346  |
| C | -6.910990  | 0.373699  | 3.841211  |



|    |            |           |           |
|----|------------|-----------|-----------|
| H  | -6.840438  | 1.222448  | 3.164559  |
| C  | -2.581714  | -4.581066 | 1.897264  |
| H  | -1.916581  | -5.439492 | 1.866995  |
| C  | -2.059342  | -3.287673 | 1.915916  |
| H  | -0.989550  | -3.106467 | 1.900912  |
| C  | -3.966590  | -4.777638 | 1.901351  |
| H  | -4.374139  | -5.782960 | 1.865147  |
| C  | -9.813917  | -1.600073 | -2.204379 |
| H  | -10.841709 | -1.435087 | -1.892807 |
| C  | -8.173152  | -2.094758 | -3.908962 |
| H  | -7.944923  | -2.318501 | -4.946795 |
| C  | -7.617789  | 0.492881  | 5.035837  |
| H  | -8.109152  | 1.429366  | 5.282022  |
| C  | -9.517175  | -1.879054 | -3.518461 |
| H  | -10.310067 | -1.937903 | -4.257923 |
| C  | -7.155041  | -2.023053 | -2.985403 |
| H  | -6.130426  | -2.184690 | -3.298479 |
| C  | -7.680353  | -0.589138 | 5.919302  |
| H  | -8.223984  | -0.496445 | 6.854579  |
| H  | -4.386907  | 0.926954  | 4.306299  |
| C  | -3.623542  | 1.082828  | 3.550436  |
| H  | -2.711270  | 0.496211  | 3.636050  |
| C  | -3.535664  | 2.289364  | 2.898150  |
| C  | -3.651775  | 2.975456  | 1.843634  |
| C  | -3.330754  | 4.198511  | 1.148337  |
| C  | -2.098456  | 4.827845  | 1.408815  |
| C  | -1.735374  | 5.978749  | 0.717739  |
| H  | -0.771137  | 6.438220  | 0.908493  |
| C  | -2.596481  | 6.518285  | -0.241318 |
| H  | -2.307791  | 7.409802  | -0.790346 |
| H  | -4.491220  | 6.316017  | -1.252118 |
| C  | -3.824044  | 5.903859  | -0.501307 |
| C  | -4.191220  | 4.749315  | 0.186028  |
| H  | -5.131948  | 4.254888  | -0.033091 |
| H  | -1.424710  | 4.390181  | 2.136023  |
| Cu | 3.797042   | -1.031810 | -0.020485 |
| Fe | 7.573212   | 1.464583  | 0.102672  |
| P  | 5.908705   | -1.514202 | -0.616173 |
| C  | 6.705382   | 0.048234  | -1.102673 |
| C  | 6.026773   | 1.323726  | -1.248129 |
| C  | 6.987796   | 2.280136  | -1.718883 |
| H  | 6.783318   | 3.327100  | -1.886221 |
| C  | 8.234049   | 1.618311  | -1.871496 |
| H  | 9.164700   | 2.083375  | -2.165885 |
| C  | 8.064777   | 0.254802  | -1.499807 |
| H  | 8.839704   | -0.497255 | -1.472776 |
| C  | 7.120014   | 1.129869  | 2.091399  |
| H  | 6.316594   | 0.489393  | 2.427374  |
| C  | 7.026503   | 2.526021  | 1.798086  |
| H  | 6.138469   | 3.137794  | 1.869534  |
| C  | 8.300836   | 2.966583  | 1.335780  |
| H  | 8.541163   | 3.964297  | 0.995152  |
| C  | 9.185006   | 1.846093  | 1.346622  |
| H  | 10.213571  | 1.846611  | 1.012717  |
| C  | 8.457586   | 0.711779  | 1.813459  |
| H  | 8.831080   | -0.299135 | 1.893072  |
| O  | 4.305180   | 2.941623  | -1.280910 |
| C  | 4.637494   | 1.672815  | -0.960599 |
| N  | 3.701693   | 0.945805  | -0.442914 |

|   |           |           |           |
|---|-----------|-----------|-----------|
| C | 2.514022  | 1.811910  | -0.238540 |
| C | 2.841131  | 3.010202  | -1.191083 |
| H | 2.470196  | 2.736334  | -2.184106 |
| H | 1.621183  | 1.284299  | -0.583635 |
| C | 5.843382  | -2.449730 | -2.196033 |
| C | 5.815128  | -1.790568 | -3.432205 |
| H | 5.974751  | -0.717930 | -3.479658 |
| C | 5.567215  | -2.504428 | -4.606501 |
| H | 5.553231  | -1.983286 | -5.559636 |
| C | 5.344395  | -3.882130 | -4.558213 |
| H | 5.155433  | -4.436883 | -5.472520 |
| C | 5.377877  | -4.546652 | -3.328415 |
| H | 5.215225  | -5.619804 | -3.284793 |
| C | 5.620818  | -3.834923 | -2.154380 |
| H | 5.637498  | -4.356912 | -1.201035 |
| C | 7.175320  | -2.375172 | 0.388384  |
| C | 6.977721  | -2.429997 | 1.775027  |
| H | 6.071942  | -2.017855 | 2.204796  |
| C | 7.943078  | -3.006885 | 2.602166  |
| H | 7.776187  | -3.040090 | 3.674181  |
| C | 9.107844  | -3.541984 | 2.048364  |
| H | 9.859492  | -3.991806 | 2.690336  |
| C | 9.299941  | -3.513395 | 0.662992  |
| H | 10.197662 | -3.944228 | 0.229367  |
| C | 8.336930  | -2.937139 | -0.165327 |
| H | 8.479815  | -2.936197 | -1.241997 |
| C | 2.338466  | 2.156114  | 1.229511  |
| C | 1.081336  | 2.544618  | 1.705037  |
| C | 3.423134  | 2.150598  | 2.115105  |
| C | 0.915094  | 2.923393  | 3.037612  |
| C | 3.264918  | 2.560090  | 3.440605  |
| C | 2.007041  | 2.947167  | 3.907701  |
| H | 0.221350  | 2.528050  | 1.046814  |
| H | 4.389221  | 1.815410  | 1.760424  |
| H | -0.074706 | 3.183815  | 3.399503  |
| H | 4.123808  | 2.578627  | 4.106211  |
| H | 1.877604  | 3.254196  | 4.941253  |
| C | 2.422914  | 4.419742  | -0.876828 |
| C | 1.637564  | 5.108363  | -1.809482 |
| C | 2.827336  | 5.086399  | 0.288953  |
| C | 1.227123  | 6.420919  | -1.573794 |
| C | 2.426922  | 6.400924  | 0.522628  |
| C | 1.621885  | 7.070640  | -0.403896 |
| H | 1.347004  | 4.607451  | -2.728401 |
| H | 3.452715  | 4.578427  | 1.012759  |
| H | 0.611476  | 6.935616  | -2.305392 |
| H | 2.746095  | 6.905362  | 1.429786  |
| H | 1.313629  | 8.095411  | -0.217806 |
| H | 0.543994  | 2.942353  | -4.426449 |
| C | -0.383431 | 1.022117  | -4.139960 |
| C | 0.705846  | 1.871376  | -4.349956 |
| C | 1.994364  | 1.342890  | -4.464139 |
| H | 2.842665  | 2.001726  | -4.629818 |
| C | 2.195939  | -0.034162 | -4.355110 |
| H | 3.197823  | -0.449621 | -4.401287 |
| H | 2.338587  | -2.667682 | -4.285468 |
| C | 1.315892  | -2.378550 | -4.031300 |
| H | 0.609515  | -2.944251 | -4.641452 |
| C | 1.107253  | -0.891745 | -4.163171 |

|   |           |           |           |
|---|-----------|-----------|-----------|
| H | -1.030328 | -1.013714 | -3.905113 |
| C | -0.182254 | -0.354579 | -4.062285 |
| H | -1.381634 | 1.434362  | -4.036033 |
| O | 1.026531  | -2.852884 | -2.673352 |
| C | 1.892995  | -2.459009 | -1.731672 |
| C | 0.943645  | -4.288600 | -0.246842 |
| H | 0.408799  | -4.477099 | 0.685856  |
| H | 1.775129  | -4.996929 | -0.326411 |
| H | 0.244415  | -4.481091 | -1.059024 |
| C | 1.439410  | -2.840287 | -0.330436 |
| N | 2.476570  | -2.439831 | 0.632344  |
| C | 2.542253  | -3.036859 | 1.764570  |
| H | 1.934429  | -3.918923 | 1.977070  |
| C | 3.415658  | -2.581994 | 2.854473  |
| C | 3.606830  | -1.210561 | 3.095447  |
| H | 3.059126  | -0.484631 | 2.503797  |
| H | 4.570322  | 0.262166  | 4.322731  |
| C | 4.446618  | -0.797396 | 4.128609  |
| C | 5.104352  | -1.741325 | 4.923769  |
| H | 5.760400  | -1.413922 | 5.724852  |
| C | 4.897940  | -3.106145 | 4.702527  |
| H | 5.396101  | -3.841621 | 5.326795  |
| C | 4.044072  | -3.524477 | 3.682504  |
| H | 3.880157  | -4.585249 | 3.511014  |
| O | 2.894614  | -1.816788 | -1.990206 |
| H | 0.614854  | -2.128981 | -0.147738 |
| O | -0.022232 | -0.194784 | -0.085563 |
| C | -0.415688 | -0.095797 | 1.096828  |
| O | 0.315956  | -0.895631 | 1.997926  |
| O | -1.351503 | 0.590578  | 1.573185  |
| H | 0.075412  | 0.339770  | 3.662741  |
| C | 0.040239  | -0.716799 | 3.385886  |
| H | -0.937709 | -1.127046 | 3.661821  |
| H | 0.821375  | -1.263039 | 3.920647  |

#### TS34ii-A\_NiCu

|                                             |               |
|---------------------------------------------|---------------|
| Charge                                      | 1             |
| Electronic Energy, BS1 (a.u.)               | -6284.733137  |
| Thermal and entropic correction, BS1 (a.u.) | 1.534587      |
| Electronic Energy, BS2 (a.u.)               | -10207.214406 |
| Number of Imaginary Frequencies             | 1             |
| Imaginary frequencies (cm-1)                | -1227.4i      |

#### Molecular Geometry in Cartesian Coordinates

|    |           |           |           |
|----|-----------|-----------|-----------|
| Ni | -4.496236 | 0.934695  | 1.583164  |
| P  | -4.670983 | 1.039323  | -0.618375 |
| C  | -7.198794 | 2.177649  | -0.415946 |
| H  | -6.913904 | 2.348893  | 0.619040  |
| C  | -4.250197 | -0.668108 | -1.198058 |
| C  | -3.854629 | 2.950836  | -2.566230 |
| H  | -4.826602 | 2.835416  | -3.029171 |
| C  | -3.492388 | 2.177460  | -1.452712 |
| C  | -6.310044 | 1.511911  | -1.271633 |
| C  | -2.882322 | -0.920678 | -1.492353 |
| H  | -2.161530 | -0.114994 | -1.496828 |
| C  | -6.685853 | 1.269573  | -2.601853 |
| H  | -6.019126 | 0.726263  | -3.263698 |

|   |            |           |           |
|---|------------|-----------|-----------|
| C | -4.709710  | -3.063429 | -1.423793 |
| C | -5.157960  | -1.728805 | -1.138469 |
| C | -2.979708  | 3.917019  | -3.064414 |
| H | -3.275633  | 4.517894  | -3.919124 |
| C | -3.326629  | -3.294651 | -1.718587 |
| C | -2.433790  | -2.195975 | -1.732904 |
| H | -1.378981  | -2.363173 | -1.927444 |
| C | -2.233813  | 2.370980  | -0.861124 |
| H | -1.949826  | 1.782198  | 0.006330  |
| C | -8.807508  | 2.360350  | -2.210636 |
| H | -9.778221  | 2.683374  | -2.574251 |
| C | -8.442718  | 2.602056  | -0.884913 |
| H | -9.127177  | 3.112747  | -0.214329 |
| C | -7.929060  | 1.692528  | -3.067684 |
| H | -8.219472  | 1.480595  | -4.091487 |
| C | -2.878009  | -4.616895 | -1.979980 |
| H | -1.826364  | -4.772106 | -2.203349 |
| C | -5.122748  | -5.453715 | -1.669115 |
| H | -5.811364  | -6.293213 | -1.650580 |
| C | -1.371643  | 3.345971  | -1.355450 |
| H | -0.422381  | 3.518292  | -0.864264 |
| C | -3.755336  | -5.676092 | -1.959449 |
| H | -3.403859  | -6.682600 | -2.165523 |
| C | -5.586564  | -4.185371 | -1.403604 |
| H | -6.634213  | -4.035471 | -1.172876 |
| C | -1.747191  | 4.129000  | -2.447056 |
| H | -1.084093  | 4.905896  | -2.814568 |
| P | -5.674749  | -0.933599 | 1.839977  |
| C | -3.342103  | -2.435942 | 1.949871  |
| H | -2.849458  | -1.472137 | 1.932127  |
| C | -6.966137  | -1.220236 | 0.546355  |
| C | -6.829481  | -1.851957 | 4.289925  |
| H | -6.396682  | -2.824266 | 4.083186  |
| C | -6.639615  | -0.789019 | 3.398436  |
| C | -4.740252  | -2.497710 | 1.916145  |
| C | -8.337477  | -1.033699 | 0.871796  |
| H | -8.624298  | -0.819758 | 1.893629  |
| C | -5.382139  | -3.745715 | 1.874719  |
| H | -6.464402  | -3.801924 | 1.803488  |
| C | -7.600206  | -1.618080 | -1.782189 |
| C | -6.595023  | -1.519748 | -0.764879 |
| C | -7.567001  | -1.660454 | 5.461444  |
| H | -7.704667  | -2.489697 | 6.148792  |
| C | -8.972633  | -1.389593 | -1.442703 |
| C | -9.308951  | -1.114046 | -0.094870 |
| H | -10.351938 | -0.959196 | 0.167506  |
| C | -7.190068  | 0.469030  | 3.702975  |
| H | -7.022274  | 1.305548  | 3.028360  |
| C | -3.229856  | -4.850066 | 1.922217  |
| H | -2.645039  | -5.764834 | 1.910815  |
| C | -2.589608  | -3.610705 | 1.954454  |
| H | -1.506979  | -3.544545 | 1.966129  |
| C | -4.625730  | -4.916107 | 1.884699  |
| H | -5.124286  | -5.879192 | 1.838851  |
| C | -9.960499  | -1.427628 | -2.462377 |
| H | -10.997140 | -1.249532 | -2.189918 |
| C | -8.259100  | -1.913118 | -4.109783 |
| H | -7.992174  | -2.115932 | -5.142612 |
| C | -7.932147  | 0.654274  | 4.867504  |

|    |            |           |           |
|----|------------|-----------|-----------|
| H  | -8.352403  | 1.630179  | 5.091032  |
| C  | -9.613982  | -1.679941 | -3.769675 |
| H  | -10.376057 | -1.704667 | -4.542651 |
| C  | -7.279309  | -1.886156 | -3.143306 |
| H  | -6.246012  | -2.062674 | -3.417538 |
| C  | -8.122227  | -0.413447 | 5.749925  |
| H  | -8.694119  | -0.269864 | 6.661565  |
| H  | -4.535864  | 0.633539  | 4.310114  |
| C  | -3.769775  | 0.791234  | 3.556359  |
| H  | -2.898951  | 0.141022  | 3.600858  |
| C  | -3.612764  | 2.034024  | 2.988932  |
| C  | -3.733400  | 2.813650  | 2.001029  |
| C  | -3.420012  | 4.092090  | 1.407141  |
| C  | -2.202782  | 4.723361  | 1.728218  |
| C  | -1.856473  | 5.928528  | 1.124957  |
| H  | -0.903254  | 6.391460  | 1.360509  |
| C  | -2.719406  | 6.521452  | 0.199372  |
| H  | -2.445925  | 7.458443  | -0.276986 |
| H  | -4.602087  | 6.360129  | -0.841306 |
| C  | -3.932907  | 5.905373  | -0.117521 |
| C  | -4.283011  | 4.697141  | 0.479616  |
| H  | -5.212222  | 4.203355  | 0.215429  |
| H  | -1.524963  | 4.249169  | 2.428805  |
| Cu | 4.133665   | -1.055416 | -0.191831 |
| Fe | 7.877654   | 1.444414  | 0.335687  |
| P  | 6.266803   | -1.533544 | -0.602020 |
| C  | 7.153200   | 0.020649  | -0.971624 |
| C  | 6.525141   | 1.309057  | -1.205038 |
| C  | 7.553058   | 2.248389  | -1.550791 |
| H  | 7.389338   | 3.297458  | -1.748476 |
| C  | 8.798436   | 1.567581  | -1.529490 |
| H  | 9.767438   | 2.016274  | -1.699122 |
| C  | 8.558804   | 0.209325  | -1.172306 |
| H  | 9.311881   | -0.552355 | -1.029853 |
| C  | 7.111533   | 1.183317  | 2.233593  |
| H  | 6.231466   | 0.592621  | 2.442610  |
| C  | 7.141158   | 2.574201  | 1.904684  |
| H  | 6.289552   | 3.235742  | 1.829824  |
| C  | 8.493473   | 2.937960  | 1.635820  |
| H  | 8.837212   | 3.912566  | 1.317525  |
| C  | 9.302936   | 1.774884  | 1.805299  |
| H  | 10.368988  | 1.713888  | 1.634348  |
| C  | 8.452002   | 0.692634  | 2.175684  |
| H  | 8.754479   | -0.332794 | 2.330444  |
| O  | 4.807031   | 2.931426  | -1.464802 |
| C  | 5.117086   | 1.669894  | -1.076589 |
| N  | 4.146393   | 0.946198  | -0.636137 |
| C  | 2.919244   | 1.759837  | -0.639611 |
| C  | 3.350944   | 3.013862  | -1.487911 |
| H  | 3.046212   | 2.839458  | -2.523985 |
| H  | 2.137813   | 1.214145  | -1.174631 |
| C  | 6.387474   | -2.505108 | -2.159652 |
| C  | 7.275827   | -2.228339 | -3.207408 |
| H  | 7.962238   | -1.391300 | -3.136126 |
| C  | 7.273484   | -3.019554 | -4.359159 |
| H  | 7.964285   | -2.795137 | -5.166800 |
| C  | 6.388844   | -4.092873 | -4.472996 |
| H  | 6.389945   | -4.705949 | -5.369515 |
| C  | 5.496212   | -4.371858 | -3.434055 |

|   |           |           |           |
|---|-----------|-----------|-----------|
| H | 4.798416  | -5.199730 | -3.521484 |
| C | 5.489140  | -3.577693 | -2.289352 |
| H | 4.773092  | -3.770555 | -1.495282 |
| C | 7.390864  | -2.399170 | 0.562227  |
| C | 7.029550  | -2.427185 | 1.916614  |
| H | 6.092663  | -1.982483 | 2.233072  |
| C | 7.872596  | -3.020838 | 2.857892  |
| H | 7.578047  | -3.033769 | 3.902517  |
| C | 9.077878  | -3.597386 | 2.451539  |
| H | 9.733930  | -4.060912 | 3.182539  |
| C | 9.432263  | -3.594275 | 1.098557  |
| H | 10.360122 | -4.059191 | 0.778118  |
| C | 8.590361  | -3.003759 | 0.155748  |
| H | 8.857149  | -3.026851 | -0.897115 |
| C | 2.454449  | 2.039997  | 0.774861  |
| C | 1.092034  | 2.024720  | 1.076031  |
| C | 3.370832  | 2.328794  | 1.794011  |
| C | 0.644765  | 2.301655  | 2.370651  |
| C | 2.929833  | 2.624032  | 3.083131  |
| C | 1.562373  | 2.612255  | 3.375473  |
| H | 0.381909  | 1.753034  | 0.304997  |
| H | 4.430946  | 2.295153  | 1.575220  |
| H | -0.416309 | 2.234263  | 2.584237  |
| H | 3.652083  | 2.856716  | 3.860779  |
| H | 1.218638  | 2.829691  | 4.382676  |
| C | 2.874249  | 4.361049  | -1.028715 |
| C | 1.708262  | 4.889810  | -1.591906 |
| C | 3.525545  | 5.068839  | -0.012185 |
| C | 1.173553  | 6.089184  | -1.118716 |
| C | 3.001294  | 6.274910  | 0.450585  |
| C | 1.818411  | 6.783101  | -0.093338 |
| H | 1.217419  | 4.350405  | -2.397086 |
| H | 4.443284  | 4.672004  | 0.407316  |
| H | 0.258242  | 6.483288  | -1.549929 |
| H | 3.514441  | 6.818287  | 1.238485  |
| H | 1.410962  | 7.722100  | 0.270139  |
| H | 0.191176  | 3.215160  | -4.399666 |
| C | -0.527883 | 1.228479  | -3.980192 |
| C | 0.450413  | 2.163076  | -4.330308 |
| C | 1.753477  | 1.738798  | -4.602155 |
| H | 2.513809  | 2.460624  | -4.888581 |
| C | 2.081583  | 0.383888  | -4.510890 |
| H | 3.100919  | 0.054404  | -4.688425 |
| H | 2.475223  | -2.213475 | -4.394306 |
| C | 1.434807  | -2.030920 | -4.114518 |
| H | 0.777899  | -2.613619 | -4.765198 |
| C | 1.102189  | -0.559318 | -4.184604 |
| H | -0.968756 | -0.852247 | -3.668664 |
| C | -0.203499 | -0.125765 | -3.921676 |
| H | -1.539360 | 1.555891  | -3.763462 |
| O | 1.185760  | -2.587638 | -2.799278 |
| C | 2.061888  | -2.201579 | -1.832315 |
| C | 0.862396  | -3.887583 | -0.326458 |
| H | 0.202320  | -3.832566 | 0.544556  |
| H | 1.510758  | -4.767309 | -0.202310 |
| H | 0.239039  | -4.053879 | -1.204011 |
| C | 1.666436  | -2.609185 | -0.491978 |
| N | 2.640509  | -2.276738 | 0.490841  |
| C | 2.637198  | -2.854372 | 1.647667  |

|   |           |           |           |
|---|-----------|-----------|-----------|
| H | 1.985074  | -3.705748 | 1.846333  |
| C | 3.437153  | -2.378532 | 2.779907  |
| C | 3.664226  | -1.003860 | 2.977508  |
| H | 3.224118  | -0.288941 | 2.291403  |
| H | 4.556889  | 0.501542  | 4.219656  |
| C | 4.410840  | -0.563359 | 4.068948  |
| C | 4.946757  | -1.482888 | 4.976085  |
| H | 5.531386  | -1.136480 | 5.823088  |
| C | 4.705286  | -2.848919 | 4.800674  |
| H | 5.107170  | -3.568038 | 5.508507  |
| C | 3.943896  | -3.292009 | 3.719706  |
| H | 3.757962  | -4.354508 | 3.585100  |
| O | 3.031130  | -1.485989 | -2.111687 |
| H | 0.689466  | -1.553354 | -0.274748 |
| O | -0.142462 | -0.719234 | -0.124052 |
| C | -0.566879 | -0.607969 | 1.089844  |
| O | 0.065504  | -1.458820 | 1.951315  |
| O | -1.444715 | 0.165634  | 1.479628  |
| H | -0.027962 | -0.189774 | 3.603225  |
| C | -0.155244 | -1.244624 | 3.351793  |
| H | -1.153954 | -1.579513 | 3.647417  |
| H | 0.603083  | -1.842005 | 3.859038  |

#### Int4ii-A\_NiCu

|                                             |               |
|---------------------------------------------|---------------|
| Charge                                      | 1             |
| Electronic Energy, BS1 (a.u.)               | -6284.736055  |
| Thermal and entropic correction, BS1 (a.u.) | 1.537480      |
| Electronic Energy, BS2 (a.u.)               | -10207.219949 |
| Number of Imaginary Frequencies             | 0             |
| Imaginary frequencies (cm-1)                | None          |

#### Molecular Geometry in Cartesian Coordinates

|    |           |           |           |
|----|-----------|-----------|-----------|
| Ni | -4.488232 | 0.923534  | 1.579799  |
| P  | -4.691525 | 1.015093  | -0.622418 |
| C  | -7.262547 | 2.047827  | -0.391067 |
| H  | -6.978173 | 2.221577  | 0.643633  |
| C  | -4.218863 | -0.676040 | -1.209894 |
| C  | -3.953642 | 2.954681  | -2.576170 |
| H  | -4.923467 | 2.806096  | -3.034159 |
| C  | -3.559677 | 2.194143  | -1.464664 |
| C  | -6.352799 | 1.427681  | -1.258921 |
| C  | -2.851536 | -0.882157 | -1.542277 |
| H  | -2.164435 | -0.047795 | -1.577829 |
| C  | -6.728167 | 1.179498  | -2.588321 |
| H  | -6.044823 | 0.668701  | -3.259109 |
| C  | -4.603561 | -3.085172 | -1.427651 |
| C  | -5.088967 | -1.766546 | -1.130529 |
| C  | -3.114990 | 3.950934  | -3.078361 |
| H  | -3.435840 | 4.540678  | -3.931776 |
| C  | -3.221523 | -3.270073 | -1.757506 |
| C  | -2.366161 | -2.141862 | -1.796113 |
| H  | -1.313686 | -2.276345 | -2.028068 |
| C  | -2.305830 | 2.432819  | -0.879987 |
| H  | -1.997590 | 1.856893  | -0.013225 |
| C  | -8.890609 | 2.177278  | -2.172800 |
| H  | -9.876657 | 2.462123  | -2.526844 |
| C  | -8.526754 | 2.422910  | -0.847547 |

|   |            |           |           |
|---|------------|-----------|-----------|
| H | -9.227364  | 2.898090  | -0.167658 |
| C | -7.991281  | 1.554065  | -3.041714 |
| H | -8.280258  | 1.338734  | -4.065177 |
| C | -2.737579  | -4.576411 | -2.035814 |
| H | -1.688992  | -4.697155 | -2.290070 |
| C | -4.945212  | -5.486875 | -1.669076 |
| H | -5.605531  | -6.348367 | -1.636109 |
| C | -1.480469  | 3.437201  | -1.377192 |
| H | -0.535456  | 3.644072  | -0.891516 |
| C | -3.579271  | -5.663582 | -1.995298 |
| H | -3.200597  | -6.657309 | -2.214538 |
| C | -5.443209  | -4.234752 | -1.389189 |
| H | -6.489433  | -4.118910 | -1.133728 |
| C | -1.887484  | 4.206121  | -2.467339 |
| H | -1.251105  | 5.004133  | -2.837424 |
| P | -5.584204  | -0.992220 | 1.858518  |
| C | -3.193640  | -2.404517 | 1.957839  |
| H | -2.742104  | -1.421457 | 1.951211  |
| C | -6.885112  | -1.323496 | 0.586527  |
| C | -6.667278  | -1.962452 | 4.319919  |
| H | -6.205772  | -2.918506 | 4.099617  |
| C | -6.526486  | -0.887628 | 3.433563  |
| C | -4.588367  | -2.519313 | 1.919396  |
| C | -8.256324  | -1.183338 | 0.935158  |
| H | -8.533430  | -0.983075 | 1.962411  |
| C | -5.180490  | -3.791104 | 1.869491  |
| H | -6.259617  | -3.889060 | 1.797108  |
| C | -7.543260  | -1.734243 | -1.733020 |
| C | -6.525511  | -1.605610 | -0.731638 |
| C | -7.393258  | -1.803614 | 5.503430  |
| H | -7.492919  | -2.641518 | 6.186780  |
| C | -8.916662  | -1.550969 | -1.370568 |
| C | -9.239953  | -1.291180 | -0.016425 |
| H | -10.283058 | -1.171420 | 0.263199  |
| C | -7.114909  | 0.348981  | 3.754446  |
| H | -6.986526  | 1.194881  | 3.082758  |
| C | -2.986846  | -4.811739 | 1.913229  |
| H | -2.366477  | -5.702580 | 1.896805  |
| C | -2.395188  | -3.548447 | 1.956785  |
| H | -1.315216  | -3.444908 | 1.973635  |
| C | -4.378811  | -4.931301 | 1.872488  |
| H | -4.839520  | -5.912586 | 1.819040  |
| C | -9.919314  | -1.618413 | -2.374147 |
| H | -10.956547 | -1.474324 | -2.084470 |
| C | -8.230410  | -2.047013 | -4.049982 |
| H | -7.974125  | -2.239979 | -5.087362 |
| C | -7.845163  | 0.501437  | 4.931169  |
| H | -8.295058  | 1.460929  | 5.167597  |
| C | -9.586228  | -1.857529 | -3.687411 |
| H | -10.359629 | -1.905510 | -4.447915 |
| C | -7.236196  | -1.989777 | -3.099698 |
| H | -6.202556  | -2.132712 | -3.391474 |
| C | -7.985605  | -0.577854 | 5.808812  |
| H | -8.548274  | -0.459641 | 6.729760  |
| H | -4.473659  | 0.636339  | 4.307629  |
| C | -3.724503  | 0.820454  | 3.542900  |
| H | -2.827009  | 0.207322  | 3.585214  |
| C | -3.627819  | 2.065140  | 2.966008  |
| C | -3.802632  | 2.836184  | 1.979188  |



|    |           |           |           |
|----|-----------|-----------|-----------|
| C  | -3.564141 | 4.127899  | 1.378868  |
| C  | -2.384112 | 4.829393  | 1.693088  |
| C  | -2.108169 | 6.048817  | 1.082434  |
| H  | -1.182972 | 6.566859  | 1.315165  |
| C  | -3.005813 | 6.587060  | 0.156445  |
| H  | -2.787229 | 7.535277  | -0.325757 |
| H  | -4.880528 | 6.314838  | -0.875166 |
| C  | -4.183877 | 5.902022  | -0.152207 |
| C  | -4.463345 | 4.679085  | 0.452178  |
| H  | -5.364914 | 4.133494  | 0.194649  |
| H  | -1.680102 | 4.401013  | 2.397373  |
| Cu | 4.126847  | -1.046320 | -0.233169 |
| Fe | 7.853197  | 1.439160  | 0.439595  |
| P  | 6.261475  | -1.490625 | -0.660989 |
| C  | 7.144345  | 0.084685  | -0.946437 |
| C  | 6.510415  | 1.380914  | -1.113998 |
| C  | 7.534438  | 2.343088  | -1.403263 |
| H  | 7.365701  | 3.400198  | -1.546621 |
| C  | 8.783758  | 1.669368  | -1.409968 |
| H  | 9.751127  | 2.132001  | -1.548695 |
| C  | 8.549874  | 0.292428  | -1.127890 |
| H  | 9.307473  | -0.470322 | -1.019226 |
| C  | 7.092719  | 1.044048  | 2.316573  |
| H  | 6.228657  | 0.419209  | 2.489261  |
| C  | 7.086865  | 2.452593  | 2.072979  |
| H  | 6.218146  | 3.094911  | 2.036281  |
| C  | 8.429696  | 2.866302  | 1.829062  |
| H  | 8.748842  | 3.866962  | 1.571742  |
| C  | 9.268451  | 1.715756  | 1.928658  |
| H  | 10.335735 | 1.692456  | 1.756023  |
| C  | 8.444972  | 0.591553  | 2.230600  |
| H  | 8.771858  | -0.434155 | 2.322092  |
| O  | 4.770785  | 2.984538  | -1.363415 |
| C  | 5.098155  | 1.723980  | -0.982905 |
| N  | 4.136556  | 0.983288  | -0.551230 |
| C  | 2.898198  | 1.774910  | -0.564640 |
| C  | 3.313888  | 3.038740  | -1.406462 |
| H  | 3.026253  | 2.859977  | -2.446584 |
| H  | 2.132098  | 1.216148  | -1.108371 |
| C  | 6.394978  | -2.384146 | -2.263815 |
| C  | 7.344914  | -2.109990 | -3.257329 |
| H  | 8.073417  | -1.318891 | -3.114323 |
| C  | 7.349361  | -2.841194 | -4.447681 |
| H  | 8.088030  | -2.619245 | -5.212545 |
| C  | 6.408628  | -3.851318 | -4.655318 |
| H  | 6.414474  | -4.417421 | -5.582253 |
| C  | 5.454063  | -4.126005 | -3.672138 |
| H  | 4.712170  | -4.902971 | -3.833123 |
| C  | 5.441326  | -3.391624 | -2.487749 |
| H  | 4.678204  | -3.578057 | -1.737345 |
| C  | 7.378597  | -2.402359 | 0.475133  |
| C  | 6.992321  | -2.503961 | 1.819179  |
| H  | 6.041430  | -2.092314 | 2.138411  |
| C  | 7.826748  | -3.130686 | 2.746592  |
| H  | 7.511908  | -3.199738 | 3.783117  |
| C  | 9.048777  | -3.667455 | 2.335907  |
| H  | 9.698784  | -4.156376 | 3.055727  |
| C  | 9.427968  | -3.592411 | 0.991612  |
| H  | 10.368735 | -4.027409 | 0.666689  |

|   |           |           |           |
|---|-----------|-----------|-----------|
| C | 8.594463  | -2.968786 | 0.062692  |
| H | 8.880959  | -2.937257 | -0.984733 |
| C | 2.413848  | 2.056691  | 0.843230  |
| C | 1.045918  | 2.175565  | 1.093941  |
| C | 3.313340  | 2.234334  | 1.901363  |
| C | 0.577757  | 2.472560  | 2.375559  |
| C | 2.852850  | 2.549000  | 3.179653  |
| C | 1.481353  | 2.671027  | 3.421154  |
| H | 0.343826  | 1.998995  | 0.288348  |
| H | 4.372354  | 2.097992  | 1.720197  |
| H | -0.491805 | 2.508570  | 2.551612  |
| H | 3.563296  | 2.693149  | 3.988804  |
| H | 1.121674  | 2.905903  | 4.418810  |
| C | 2.802615  | 4.373332  | -0.948480 |
| C | 1.658278  | 4.903904  | -1.553362 |
| C | 3.399031  | 5.063525  | 0.113288  |
| C | 1.093233  | 6.090084  | -1.080504 |
| C | 2.843333  | 6.254631  | 0.577218  |
| C | 1.683401  | 6.766262  | -0.011567 |
| H | 1.205731  | 4.376837  | -2.389040 |
| H | 4.296948  | 4.661841  | 0.569622  |
| H | 0.196668  | 6.487983  | -1.546538 |
| H | 3.313547  | 6.783677  | 1.400837  |
| H | 1.252096  | 7.694710  | 0.351666  |
| H | 0.058422  | 3.350801  | -4.389001 |
| C | -0.609946 | 1.335667  | -4.023709 |
| C | 0.348072  | 2.306269  | -4.328143 |
| C | 1.671374  | 1.927008  | -4.566689 |
| H | 2.416598  | 2.677313  | -4.817712 |
| C | 2.038827  | 0.581617  | -4.488232 |
| H | 3.072915  | 0.286632  | -4.638390 |
| H | 2.508342  | -1.999220 | -4.438246 |
| C | 1.457183  | -1.861898 | -4.171710 |
| H | 0.833808  | -2.437885 | -4.861266 |
| C | 1.080840  | -0.398370 | -4.209718 |
| H | -0.995312 | -0.764422 | -3.770454 |
| C | -0.244853 | -0.009248 | -3.980651 |
| H | -1.637554 | 1.628040  | -3.832749 |
| O | 1.201052  | -2.476646 | -2.889964 |
| C | 2.075911  | -2.122884 | -1.892404 |
| C | 0.889995  | -3.911137 | -0.483535 |
| H | 0.181167  | -3.799660 | 0.346872  |
| H | 1.462122  | -4.832586 | -0.294367 |
| H | 0.317186  | -4.062300 | -1.396926 |
| C | 1.792324  | -2.712331 | -0.623598 |
| N | 2.669230  | -2.357199 | 0.396550  |
| C | 2.679341  | -2.982977 | 1.540044  |
| H | 2.083435  | -3.884585 | 1.686808  |
| C | 3.426561  | -2.505722 | 2.700151  |
| C | 3.639178  | -1.130333 | 2.925379  |
| H | 3.212818  | -0.408536 | 2.237813  |
| H | 4.487004  | 0.367909  | 4.206439  |
| C | 4.351892  | -0.696584 | 4.041659  |
| C | 4.868349  | -1.619370 | 4.956765  |
| H | 5.426594  | -1.277724 | 5.823155  |
| C | 4.638220  | -2.984787 | 4.759198  |
| H | 5.023083  | -3.709563 | 5.471094  |
| C | 3.914698  | -3.422000 | 3.650944  |
| H | 3.745446  | -4.485026 | 3.498835  |

|   |           |           |           |
|---|-----------|-----------|-----------|
| O | 2.988900  | -1.306776 | -2.131338 |
| H | 0.626423  | -1.308131 | -0.300896 |
| O | -0.088167 | -0.596515 | -0.178697 |
| C | -0.477898 | -0.492427 | 1.075391  |
| O | 0.224832  | -1.291985 | 1.896882  |
| O | -1.377926 | 0.247325  | 1.444265  |
| H | 0.113483  | -0.052023 | 3.568580  |
| C | 0.024391  | -1.108792 | 3.310942  |
| H | -0.954608 | -1.491351 | 3.611668  |
| H | 0.820555  | -1.681661 | 3.784138  |

**Int1\_kO\_Ni**

|                                             |              |
|---------------------------------------------|--------------|
| Charge                                      | 0            |
| Electronic Energy, BS1 (a.u.)               | -3200.696716 |
| Thermal and entropic correction, BS1 (a.u.) | 0.7238522    |
| Electronic Energy, BS2 (a.u.)               | -4539.065449 |
| Number of Imaginary Frequencies             | 0            |
| Imaginary frequencies (cm-1)                | None         |

**Molecular Geometry in Cartesian Coordinates**

|    |           |           |           |
|----|-----------|-----------|-----------|
| Ni | 0.054611  | 1.562464  | 0.608540  |
| P  | 0.885816  | -0.384172 | 0.454181  |
| C  | 1.888702  | 0.197469  | -2.081278 |
| H  | 1.808561  | 1.222044  | -1.729184 |
| C  | -0.393710 | -1.697175 | 0.829562  |
| C  | 3.105054  | -2.006445 | 1.386062  |
| H  | 2.948464  | -2.663775 | 0.537719  |
| C  | 2.291918  | -0.875323 | 1.563780  |
| C  | 1.504777  | -0.849419 | -1.227885 |
| C  | -0.247021 | -2.489965 | 2.003346  |
| H  | 0.676852  | -2.437965 | 2.567133  |
| C  | 1.603361  | -2.168943 | -1.692477 |
| H  | 1.275672  | -2.989796 | -1.062312 |
| C  | -2.650004 | -2.630154 | 0.558554  |
| C  | -1.592759 | -1.769403 | 0.110023  |
| C  | 4.126629  | -2.295606 | 2.291496  |
| H  | 4.754744  | -3.167548 | 2.134089  |
| C  | -2.482750 | -3.398025 | 1.756825  |
| C  | -1.253589 | -3.308539 | 2.455422  |
| H  | -1.117854 | -3.893735 | 3.361636  |
| C  | 2.535791  | -0.037022 | 2.662384  |
| H  | 1.918983  | 0.849919  | 2.792417  |
| C  | 2.474988  | -1.386506 | -3.812504 |
| H  | 2.843844  | -1.596159 | -4.812658 |
| C  | 2.370984  | -0.066419 | -3.364840 |
| H  | 2.662016  | 0.755755  | -4.012931 |
| C  | 2.090303  | -2.436189 | -2.973535 |
| H  | 2.151934  | -3.462963 | -3.322949 |
| C  | -3.548269 | -4.216119 | 2.221605  |
| H  | -3.404497 | -4.783302 | 3.137889  |
| C  | -4.905503 | -3.539884 | 0.339961  |
| H  | -5.845419 | -3.596873 | -0.202066 |
| C  | 3.556049  | -0.325573 | 3.571994  |
| H  | 3.732632  | 0.336087  | 4.415710  |
| C  | -4.736645 | -4.289189 | 1.530257  |
| H  | -5.545560 | -4.916470 | 1.893958  |
| C  | -3.892939 | -2.733693 | -0.131296 |

|   |           |           |           |
|---|-----------|-----------|-----------|
| H | -4.043900 | -2.156525 | -1.036131 |
| C | 4.352869  | -1.457535 | 3.387714  |
| H | 5.153849  | -1.681152 | 4.086921  |
| P | -2.036264 | 1.418666  | 0.425616  |
| C | -2.309965 | 0.219086  | 2.928684  |
| H | -1.271060 | 0.524521  | 3.027724  |
| C | -2.120851 | 0.388480  | -1.125949 |
| C | -4.440370 | 2.683223  | -0.636666 |
| H | -4.719863 | 1.729037  | -1.072841 |
| C | -3.234575 | 2.805115  | 0.076137  |
| C | -2.983433 | 0.497249  | 1.730274  |
| C | -2.248258 | 1.086843  | -2.364812 |
| H | -2.455815 | 2.151142  | -2.352993 |
| C | -4.317953 | 0.085774  | 1.593928  |
| H | -4.859458 | 0.283232  | 0.675182  |
| C | -1.698439 | -1.665529 | -2.404784 |
| C | -1.813057 | -0.976145 | -1.147698 |
| C | -5.277839 | 3.785842  | -0.813892 |
| H | -6.204254 | 3.674909  | -1.371297 |
| C | -1.837513 | -0.938938 | -3.632347 |
| C | -2.103737 | 0.452839  | -3.573376 |
| H | -2.198464 | 1.012344  | -4.500825 |
| C | -2.890758 | 4.061866  | 0.597738  |
| H | -1.950613 | 4.168776  | 1.135035  |
| C | -4.272883 | -0.881575 | 3.813375  |
| H | -4.770408 | -1.423364 | 4.613002  |
| C | -2.948431 | -0.465528 | 3.965106  |
| H | -2.408608 | -0.682166 | 4.882955  |
| C | -4.956196 | -0.602642 | 2.625980  |
| H | -5.983421 | -0.932645 | 2.498706  |
| C | -1.702818 | -1.619337 | -4.872478 |
| H | -1.804350 | -1.047165 | -5.791356 |
| C | -1.325573 | -3.700061 | -3.704812 |
| H | -1.127615 | -4.767863 | -3.737905 |
| C | -3.732212 | 5.165486  | 0.430905  |
| H | -3.449752 | 6.129271  | 0.846122  |
| C | -1.453958 | -2.973211 | -4.913075 |
| H | -1.355241 | -3.484911 | -5.866219 |
| C | -1.439081 | -3.064443 | -2.487695 |
| H | -1.324636 | -3.635279 | -1.574150 |
| C | -4.927921 | 5.029305  | -0.277385 |
| H | -5.581359 | 5.886145  | -0.416720 |
| H | 3.153702  | 3.906229  | 1.852614  |
| C | 3.824346  | 3.957427  | 0.989726  |
| H | 4.560955  | 4.746433  | 1.160082  |
| O | 3.081710  | 4.405842  | -0.180480 |
| C | 4.471329  | 2.675196  | 0.739957  |
| C | 5.012606  | 1.614448  | 0.510976  |
| C | 5.664818  | 0.369594  | 0.251130  |
| C | 6.723679  | -0.062752 | 1.072806  |
| C | 7.346052  | -1.284613 | 0.824258  |
| H | 8.158806  | -1.612607 | 1.465940  |
| C | 6.925703  | -2.087191 | -0.240987 |
| H | 7.412235  | -3.040131 | -0.428757 |
| H | 5.542164  | -2.279189 | -1.889073 |
| C | 5.878431  | -1.660192 | -1.062490 |
| C | 5.249058  | -0.440652 | -0.822672 |
| H | 4.430146  | -0.114142 | -1.452534 |
| H | 7.041944  | 0.557706  | 1.904600  |

|   |           |          |           |
|---|-----------|----------|-----------|
| C | 1.873131  | 3.859735 | -0.350141 |
| O | 1.287188  | 3.193181 | 0.494729  |
| O | 1.433843  | 4.171469 | -1.561608 |
| C | 0.075884  | 3.783458 | -1.884657 |
| H | -0.081030 | 4.126260 | -2.907015 |
| H | -0.034272 | 2.698620 | -1.823209 |
| H | -0.629073 | 4.265936 | -1.204912 |

### Int1\_kOi\_Ni

|                                             |              |
|---------------------------------------------|--------------|
| Charge                                      | 0            |
| Electronic Energy, BS1 (a.u.)               | -3200.692079 |
| Thermal and entropic correction, BS1 (a.u.) | 0.721837     |
| Electronic Energy, BS2 (a.u.)               | -4539.060200 |
| Number of Imaginary Frequencies             | 0            |
| Imaginary frequencies (cm-1)                | None         |

### Molecular Geometry in Cartesian Coordinates

|    |           |           |           |
|----|-----------|-----------|-----------|
| Ni | 0.132678  | 1.762228  | -0.194648 |
| P  | -0.907320 | -0.039037 | -0.492735 |
| C  | -1.708520 | -0.035827 | 2.172387  |
| H  | -1.529912 | 1.032248  | 2.078262  |
| C  | 0.310036  | -1.233618 | -1.261660 |
| C  | -3.090929 | -1.412669 | -1.831164 |
| H  | -2.778926 | -2.329867 | -1.343685 |
| C  | -2.394452 | -0.214553 | -1.599476 |
| C  | -1.476863 | -0.864122 | 1.062570  |
| C  | 0.178669  | -1.495421 | -2.656366 |
| H  | -0.702115 | -1.141928 | -3.180078 |
| C  | -1.695074 | -2.243562 | 1.190390  |
| H  | -1.481395 | -2.905901 | 0.358369  |
| C  | 2.467425  | -2.407879 | -1.313749 |
| C  | 1.461241  | -1.674115 | -0.595345 |
| C  | -4.186349 | -1.441792 | -2.693651 |
| H  | -4.718093 | -2.374543 | -2.858292 |
| C  | 2.310382  | -2.648472 | -2.717452 |
| C  | 1.143863  | -2.169342 | -3.363110 |
| H  | 1.020463  | -2.344673 | -4.428990 |
| C  | -2.831918 | 0.950811  | -2.243871 |
| H  | -2.308654 | 1.883853  | -2.056116 |
| C  | -2.378555 | -1.948435 | 3.494584  |
| H  | -2.722906 | -2.370224 | 4.434716  |
| C  | -2.158578 | -0.572872 | 3.380765  |
| H  | -2.333618 | 0.080871  | 4.230811  |
| C  | -2.143481 | -2.782394 | 2.397304  |
| H  | -2.292713 | -3.854596 | 2.485854  |
| C  | 3.320492  | -3.349654 | -3.430181 |
| H  | 3.182940  | -3.514367 | -4.495976 |
| C  | 4.607709  | -3.582795 | -1.399728 |
| H  | 5.499712  | -3.943457 | -0.894978 |
| C  | -3.932659 | 0.926648  | -3.104800 |
| H  | -4.261187 | 1.842812  | -3.588027 |
| C  | 4.446881  | -3.812475 | -2.787800 |
| H  | 5.213003  | -4.349051 | -3.340294 |
| C  | 3.649374  | -2.897737 | -0.685454 |
| H  | 3.798139  | -2.718820 | 0.372676  |
| C  | -4.609797 | -0.271875 | -3.333193 |
| H  | -5.469396 | -0.296188 | -3.997257 |

|   |           |           |           |
|---|-----------|-----------|-----------|
| P | 2.148582  | 1.348049  | 0.263332  |
| C | 2.651832  | 1.109069  | -2.472046 |
| H | 1.656094  | 1.539541  | -2.549369 |
| C | 2.090975  | -0.162012 | 1.350911  |
| C | 4.507073  | 2.136465  | 1.786464  |
| H | 4.803787  | 1.093331  | 1.831586  |
| C | 3.303225  | 2.501175  | 1.158237  |
| C | 3.188359  | 0.868115  | -1.197848 |
| C | 2.225973  | 0.028885  | 2.757600  |
| H | 2.495164  | 1.008619  | 3.135983  |
| C | 4.461841  | 0.287398  | -1.101166 |
| H | 4.891178  | 0.070068  | -0.129313 |
| C | 1.499657  | -2.503580 | 1.786484  |
| C | 1.693462  | -1.414218 | 0.868498  |
| C | 5.317833  | 3.102605  | 2.383289  |
| H | 6.243403  | 2.804800  | 2.868850  |
| C | 1.658389  | -2.287410 | 3.194283  |
| C | 2.013841  | -0.992613 | 3.649548  |
| H | 2.118658  | -0.818453 | 4.717592  |
| C | 2.929654  | 3.853823  | 1.156998  |
| H | 1.987069  | 4.137407  | 0.693555  |
| C | 4.629059  | 0.188338  | -3.515142 |
| H | 5.183509  | -0.085361 | -4.408472 |
| C | 3.365034  | 0.771802  | -3.624143 |
| H | 2.928462  | 0.952919  | -4.602595 |
| C | 5.176478  | -0.049794 | -2.251025 |
| H | 6.153655  | -0.515648 | -2.160123 |
| C | 1.442898  | -3.360942 | 4.100379  |
| H | 1.561070  | -3.172036 | 5.164511  |
| C | 0.941240  | -4.835783 | 2.254281  |
| H | 0.663041  | -5.822937 | 1.895550  |
| C | 3.744570  | 4.824604  | 1.746562  |
| H | 3.440527  | 5.867839  | 1.733188  |
| C | 1.092918  | -4.612275 | 3.644526  |
| H | 0.931826  | -5.426704 | 4.345116  |
| C | 1.135116  | -3.811695 | 1.353419  |
| H | 1.002105  | -3.999665 | 0.294817  |
| C | 4.941363  | 4.449981  | 2.359820  |
| H | 5.575414  | 5.200200  | 2.824358  |
| H | -4.002848 | 4.492304  | 1.190762  |
| C | -3.506726 | 3.590404  | 1.561067  |
| H | -3.445965 | 3.638929  | 2.650937  |
| O | -2.111785 | 3.606329  | 1.135766  |
| C | -4.208192 | 2.390087  | 1.128953  |
| C | -4.801344 | 1.384089  | 0.802339  |
| C | -5.505893 | 0.195529  | 0.438705  |
| C | -5.137584 | -1.042568 | 1.000578  |
| C | -5.826380 | -2.201039 | 0.649469  |
| H | -5.528840 | -3.151487 | 1.082946  |
| C | -6.890928 | -2.141330 | -0.254938 |
| H | -7.427621 | -3.046564 | -0.524589 |
| H | -8.086616 | -0.866232 | -1.521055 |
| C | -7.263139 | -0.915126 | -0.814438 |
| C | -6.574138 | 0.248320  | -0.477391 |
| H | -6.850976 | 1.200349  | -0.918802 |
| H | -4.313999 | -1.083976 | 1.702636  |
| C | -1.908171 | 3.915705  | -0.150638 |
| O | -2.741161 | 4.254141  | -0.960419 |
| O | -0.578169 | 3.821717  | -0.389079 |

|   |           |          |           |
|---|-----------|----------|-----------|
| C | -0.154374 | 4.281825 | -1.701714 |
| H | 0.932529  | 4.229337 | -1.676234 |
| H | -0.552503 | 3.621493 | -2.474112 |
| H | -0.495346 | 5.306611 | -1.861219 |

### Int1\_A\_Cu

|                                             |              |
|---------------------------------------------|--------------|
| Charge                                      | 1            |
| Electronic Energy, BS1 (a.u.)               | -3084.090238 |
| Thermal and entropic correction, BS1 (a.u.) | 0.783699     |
| Electronic Energy, BS2 (a.u.)               | -5668.093430 |
| Number of Imaginary Frequencies             | 0            |
| Imaginary frequencies (cm-1)                | None         |

### Molecular Geometry in Cartesian Coordinates

|    |           |           |           |
|----|-----------|-----------|-----------|
| Cu | -0.353057 | 0.687712  | 0.859657  |
| Fe | -2.201067 | -2.045556 | -1.963220 |
| P  | -2.310451 | 0.916023  | -0.154796 |
| C  | -2.214202 | -0.008674 | -1.725261 |
| C  | -0.979610 | -0.451202 | -2.356454 |
| C  | -1.321835 | -1.097928 | -3.590586 |
| H  | -0.615889 | -1.559623 | -4.265687 |
| C  | -2.733846 | -1.060687 | -3.731568 |
| H  | -3.300981 | -1.508587 | -4.536348 |
| C  | -3.281188 | -0.393115 | -2.599293 |
| H  | -4.332876 | -0.239513 | -2.406500 |
| C  | -2.411135 | -2.917547 | -0.098985 |
| H  | -2.483579 | -2.360180 | 0.822150  |
| C  | -1.206709 | -3.368024 | -0.718459 |
| H  | -0.203313 | -3.206084 | -0.349106 |
| C  | -1.555228 | -4.011740 | -1.945549 |
| H  | -0.863228 | -4.427926 | -2.665366 |
| C  | -2.977010 | -3.959203 | -2.081596 |
| H  | -3.547722 | -4.327278 | -2.923930 |
| C  | -3.506279 | -3.281135 | -0.941355 |
| H  | -4.546490 | -3.041528 | -0.765378 |
| O  | 1.349752  | -0.601974 | -2.784443 |
| C  | 0.390212  | -0.349248 | -1.864360 |
| N  | 0.792723  | -0.060536 | -0.675379 |
| C  | 2.269453  | 0.011601  | -0.701479 |
| C  | 2.622673  | -0.674625 | -2.071432 |
| H  | 3.333223  | -0.057991 | -2.621811 |
| H  | 2.536452  | 1.070225  | -0.771586 |
| C  | -2.568584 | 2.654952  | -0.693033 |
| C  | -2.034230 | 3.119781  | -1.903971 |
| H  | -1.555747 | 2.428407  | -2.590995 |
| C  | -2.106687 | 4.475784  | -2.231024 |
| H  | -1.694115 | 4.823138  | -3.174196 |
| C  | -2.709165 | 5.380267  | -1.353003 |
| H  | -2.765159 | 6.434394  | -1.609059 |
| C  | -3.243004 | 4.922791  | -0.144610 |
| H  | -3.716512 | 5.619573  | 0.541370  |
| C  | -3.170872 | 3.568989  | 0.186911  |
| H  | -3.588622 | 3.224118  | 1.128830  |
| C  | -3.894540 | 0.422855  | 0.621672  |
| C  | -3.837431 | -0.274792 | 1.837679  |
| H  | -2.872826 | -0.478293 | 2.294231  |
| C  | -5.010743 | -0.707851 | 2.459768  |

|   |           |           |           |
|---|-----------|-----------|-----------|
| H | -4.955255 | -1.252366 | 3.397984  |
| C | -6.250195 | -0.433996 | 1.877099  |
| H | -7.163734 | -0.768663 | 2.360177  |
| C | -6.316598 | 0.284967  | 0.678716  |
| H | -7.280512 | 0.513154  | 0.232923  |
| C | -5.145764 | 0.716551  | 0.054812  |
| H | -5.204912 | 1.291730  | -0.864092 |
| C | 2.913317  | -0.568780 | 0.534117  |
| C | 3.978935  | 0.105338  | 1.141629  |
| C | 2.472746  | -1.780417 | 1.082415  |
| C | 4.601024  | -0.426545 | 2.274699  |
| C | 3.091301  | -2.312986 | 2.212213  |
| C | 4.158989  | -1.638250 | 2.811540  |
| H | 4.320763  | 1.048356  | 0.724466  |
| H | 1.636668  | -2.299811 | 0.627808  |
| H | 5.426980  | 0.106721  | 2.737419  |
| H | 2.727691  | -3.245095 | 2.634416  |
| H | 4.637978  | -2.051861 | 3.694605  |
| C | 3.102216  | -2.103791 | -2.003078 |
| C | 4.459790  | -2.347556 | -1.759168 |
| C | 2.219958  | -3.184725 | -2.110027 |
| C | 4.925587  | -3.653221 | -1.603612 |
| C | 2.687356  | -4.492498 | -1.958942 |
| C | 4.039045  | -4.730205 | -1.699990 |
| H | 5.148170  | -1.510577 | -1.674530 |
| H | 1.170553  | -3.006131 | -2.314310 |
| H | 5.979630  | -3.830397 | -1.409526 |
| H | 1.993339  | -5.324473 | -2.041409 |
| H | 4.401662  | -5.747101 | -1.580001 |
| H | 5.078725  | 1.808475  | -3.416465 |
| C | 5.202435  | 2.729964  | -1.469139 |
| C | 4.559568  | 2.396883  | -2.665177 |
| C | 3.247491  | 2.823420  | -2.892986 |
| H | 2.740601  | 2.558594  | -3.816485 |
| C | 2.580376  | 3.578096  | -1.926101 |
| H | 1.553716  | 3.891258  | -2.089280 |
| H | 1.568269  | 5.148212  | -0.071687 |
| C | 2.510477  | 4.749026  | 0.310603  |
| H | 3.134132  | 5.568553  | 0.670953  |
| C | 3.222919  | 3.926383  | -0.731368 |
| H | 5.040861  | 3.765342  | 0.416349  |
| C | 4.538088  | 3.497499  | -0.509580 |
| H | 6.221618  | 2.400915  | -1.288018 |
| O | 2.226396  | 3.988555  | 1.534770  |
| C | 1.259664  | 3.077878  | 1.448886  |
| C | -0.287923 | 3.309584  | 3.357197  |
| H | -0.553694 | 2.938204  | 4.350530  |
| H | -1.152952 | 3.207137  | 2.695274  |
| H | -0.018703 | 4.367140  | 3.433260  |
| C | 0.895284  | 2.490429  | 2.804623  |
| H | 1.753714  | 2.579054  | 3.477595  |
| N | 0.492718  | 1.081059  | 2.651740  |
| C | 0.722263  | 0.330437  | 3.674539  |
| H | 1.245596  | 0.761323  | 4.534134  |
| C | 0.353678  | -1.076190 | 3.828796  |
| C | -0.373471 | -1.811887 | 2.874702  |
| H | -0.711203 | -1.330254 | 1.962155  |
| H | -1.202502 | -3.717985 | 2.336501  |
| C | -0.647400 | -3.160088 | 3.083769  |



|   |           |           |          |
|---|-----------|-----------|----------|
| C | -0.201655 | -3.797539 | 4.247612 |
| H | -0.413434 | -4.851327 | 4.404026 |
| C | 0.513538  | -3.076464 | 5.207325 |
| H | 0.859828  | -3.565915 | 6.112592 |
| C | 0.786171  | -1.725729 | 4.999798 |
| H | 1.348891  | -1.165987 | 5.742293 |
| O | 0.670656  | 2.800506  | 0.416576 |

### Int1\_A\_kOi\_Cu

|                                             |              |
|---------------------------------------------|--------------|
| Charge                                      | 1            |
| Electronic Energy, BS1 (a.u.)               | -3084.091528 |
| Thermal and entropic correction, BS1 (a.u.) | 0.790204     |
| Electronic Energy, BS2 (a.u.)               | -5668.094387 |
| Number of Imaginary Frequencies             | 1            |
| Imaginary frequencies (cm-1)                | -3.9i        |

### Molecular Geometry in Cartesian Coordinates

|    |           |           |           |
|----|-----------|-----------|-----------|
| Cu | 0.436009  | -0.547091 | 0.859758  |
| Fe | 0.685958  | 2.960584  | -1.643741 |
| P  | 2.327064  | 0.273160  | -0.063359 |
| C  | 1.795271  | 1.232086  | -1.515818 |
| C  | 0.560006  | 1.003254  | -2.244763 |
| C  | 0.563688  | 1.856202  | -3.398517 |
| H  | -0.241385 | 1.936581  | -4.114591 |
| C  | 1.772395  | 2.601661  | -3.391429 |
| H  | 2.046757  | 3.366661  | -4.105077 |
| C  | 2.528306  | 2.221184  | -2.246142 |
| H  | 3.484359  | 2.629768  | -1.951315 |
| C  | 0.291523  | 3.687645  | 0.258094  |
| H  | 0.617346  | 3.217860  | 1.173254  |
| C  | -0.929909 | 3.427728  | -0.433976 |
| H  | -1.689032 | 2.716873  | -0.137870 |
| C  | -0.947025 | 4.232192  | -1.614497 |
| H  | -1.721093 | 4.238008  | -2.370172 |
| C  | 0.266183  | 4.986071  | -1.650706 |
| H  | 0.571229  | 5.659219  | -2.440943 |
| C  | 1.033019  | 4.647706  | -0.494419 |
| H  | 2.019973  | 5.017899  | -0.251287 |
| O  | -1.435496 | -0.077946 | -2.903202 |
| C  | -0.553992 | 0.126612  | -1.900849 |
| N  | -0.806003 | -0.461937 | -0.779168 |
| C  | -2.005520 | -1.307885 | -0.979988 |
| C  | -2.587861 | -0.771568 | -2.337329 |
| H  | -2.813882 | -1.609612 | -2.998207 |
| H  | -1.649413 | -2.323610 | -1.150427 |
| C  | 3.543127  | -0.907358 | -0.778100 |
| C  | 3.683557  | -1.093602 | -2.162096 |
| H  | 3.112185  | -0.488542 | -2.857709 |
| C  | 4.561251  | -2.061178 | -2.657769 |
| H  | 4.658825  | -2.196353 | -3.731223 |
| C  | 5.310111  | -2.846865 | -1.779719 |
| H  | 5.992160  | -3.598403 | -2.166833 |
| C  | 5.177977  | -2.663413 | -0.400149 |
| H  | 5.754467  | -3.273106 | 0.289590  |
| C  | 4.296434  | -1.705682 | 0.099207  |
| H  | 4.190573  | -1.585363 | 1.171617  |
| C  | 3.327878  | 1.430273  | 0.942832  |

|   |           |           |           |
|---|-----------|-----------|-----------|
| C | 2.779871  | 1.884999  | 2.152393  |
| H | 1.807719  | 1.517915  | 2.471929  |
| C | 3.478041  | 2.800790  | 2.942229  |
| H | 3.045369  | 3.150736  | 3.875072  |
| C | 4.734349  | 3.256494  | 2.534391  |
| H | 5.280866  | 3.965544  | 3.149564  |
| C | 5.295289  | 2.790491  | 1.340562  |
| H | 6.277301  | 3.135084  | 1.029285  |
| C | 4.597884  | 1.878337  | 0.547326  |
| H | 5.043362  | 1.508694  | -0.371524 |
| C | -2.945767 | -1.327358 | 0.197489  |
| C | -3.483763 | -2.545661 | 0.628914  |
| C | -3.320682 | -0.147292 | 0.850375  |
| C | -4.389731 | -2.583313 | 1.692219  |
| C | -4.225409 | -0.180919 | 1.910002  |
| C | -4.763019 | -1.399619 | 2.333928  |
| H | -3.190093 | -3.464644 | 0.128328  |
| H | -2.899129 | 0.796799  | 0.525888  |
| H | -4.800046 | -3.534783 | 2.019054  |
| H | -4.495314 | 0.741486  | 2.414282  |
| H | -5.464965 | -1.426145 | 3.162795  |
| C | -3.763236 | 0.172234  | -2.246177 |
| C | -5.054621 | -0.358852 | -2.136429 |
| C | -3.587349 | 1.559870  | -2.198908 |
| C | -6.151628 | 0.484228  | -1.957557 |
| C | -4.686168 | 2.404367  | -2.024049 |
| C | -5.969875 | 1.869236  | -1.896376 |
| H | -5.197544 | -1.435607 | -2.172229 |
| H | -2.594260 | 1.980942  | -2.302622 |
| H | -7.147876 | 0.060852  | -1.866709 |
| H | -4.536613 | 3.479906  | -1.985772 |
| H | -6.823991 | 2.525711  | -1.756894 |
| H | -0.568858 | -3.077024 | -4.483540 |
| C | -1.348812 | -4.367204 | -2.939092 |
| C | -0.436788 | -3.453719 | -3.473487 |
| C | 0.649242  | -3.026032 | -2.702957 |
| H | 1.366563  | -2.322998 | -3.113843 |
| C | 0.822471  | -3.501756 | -1.402874 |
| H | 1.673786  | -3.171476 | -0.816463 |
| H | 0.991171  | -5.459922 | 0.684466  |
| C | 0.054634  | -4.911888 | 0.557487  |
| H | -0.781573 | -5.555007 | 0.835201  |
| C | -0.101555 | -4.403396 | -0.852027 |
| H | -1.902146 | -5.531618 | -1.209760 |
| C | -1.183376 | -4.833926 | -1.631664 |
| H | -2.193421 | -4.707019 | -3.531624 |
| O | 0.024462  | -3.827542 | 1.537409  |
| C | 1.206873  | -3.359031 | 1.972669  |
| C | 2.369730  | -1.802806 | 3.588359  |
| H | 2.218156  | -1.221627 | 4.501957  |
| H | 2.799678  | -1.146823 | 2.827707  |
| H | 3.069902  | -2.615564 | 3.792233  |
| C | 1.025495  | -2.356854 | 3.114178  |
| H | 0.553967  | -2.925350 | 3.927690  |
| N | 0.146141  | -1.226036 | 2.732491  |
| C | -0.577966 | -0.768420 | 3.697683  |
| H | -0.597388 | -1.328442 | 4.638113  |
| C | -1.367537 | 0.460350  | 3.715618  |
| C | -1.227100 | 1.503351  | 2.781906  |

|   |           |           |          |
|---|-----------|-----------|----------|
| H | -0.508974 | 1.418274  | 1.972807 |
| H | -1.874651 | 3.461681  | 2.183325 |
| C | -1.998132 | 2.656826  | 2.899569 |
| C | -2.924418 | 2.783883  | 3.940592 |
| H | -3.522960 | 3.686223  | 4.025115 |
| C | -3.068609 | 1.756830  | 4.877400 |
| H | -3.781880 | 1.853735  | 5.690256 |
| C | -2.286758 | 0.609358  | 4.771426 |
| H | -2.389224 | -0.187581 | 5.503504 |
| O | 2.288022  | -3.732379 | 1.563432 |

**TS45\_A\_OEther\_Cu**

|                                             |              |
|---------------------------------------------|--------------|
| Charge                                      | 0            |
| Electronic Energy, BS1 (a.u.)               | -3387.904447 |
| Thermal and entropic correction, BS1 (a.u.) | 0.825534     |
| Electronic Energy, BS2 (a.u.)               | -5972.045807 |
| Number of Imaginary Frequencies             | 1            |
| Imaginary frequencies (cm-1)                | -1240.7i     |

**Molecular Geometry in Cartesian Coordinates**

|    |           |           |           |
|----|-----------|-----------|-----------|
| Cu | 0.238806  | -0.768942 | 0.271653  |
| Fe | 3.174712  | 2.296805  | -0.767666 |
| P  | 2.201459  | -1.028192 | -0.777117 |
| C  | 2.588310  | 0.530489  | -1.639185 |
| C  | 1.629347  | 1.587105  | -1.908309 |
| C  | 2.306061  | 2.626849  | -2.628740 |
| H  | 1.858820  | 3.559877  | -2.940560 |
| C  | 3.660778  | 2.234661  | -2.799838 |
| H  | 4.437544  | 2.828076  | -3.263189 |
| C  | 3.835379  | 0.953849  | -2.200929 |
| H  | 4.762416  | 0.401930  | -2.140343 |
| C  | 3.080717  | 2.082072  | 1.284801  |
| H  | 2.628826  | 1.235475  | 1.779490  |
| C  | 2.404134  | 3.274624  | 0.888976  |
| H  | 1.353354  | 3.484461  | 1.032112  |
| C  | 3.342553  | 4.114580  | 0.216244  |
| H  | 3.126539  | 5.072396  | -0.238475 |
| C  | 4.603048  | 3.440874  | 0.199839  |
| H  | 5.508630  | 3.799782  | -0.271310 |
| C  | 4.441584  | 2.184339  | 0.859703  |
| H  | 5.198271  | 1.420256  | 0.975455  |
| O  | -0.515313 | 2.555111  | -2.193113 |
| C  | 0.234136  | 1.678360  | -1.484655 |
| N  | -0.351921 | 1.050112  | -0.525990 |
| C  | -1.774646 | 1.435013  | -0.532231 |
| C  | -1.814004 | 2.652557  | -1.534403 |
| H  | -2.574629 | 2.480053  | -2.297077 |
| H  | -2.332720 | 0.601855  | -0.970490 |
| C  | 1.943666  | -2.242594 | -2.136559 |
| C  | 2.226630  | -1.986236 | -3.484843 |
| H  | 2.675035  | -1.042577 | -3.779511 |
| C  | 1.923507  | -2.941612 | -4.460349 |
| H  | 2.142855  | -2.732289 | -5.503750 |
| C  | 1.341130  | -4.157907 | -4.097738 |
| H  | 1.102429  | -4.895534 | -4.858701 |
| C  | 1.058918  | -4.421532 | -2.752724 |
| H  | 0.594407  | -5.360364 | -2.464561 |

|   |           |           |           |
|---|-----------|-----------|-----------|
| C | 1.352011  | -3.467236 | -1.780080 |
| H | 1.098268  | -3.658171 | -0.740618 |
| C | 3.811559  | -1.518134 | -0.038450 |
| C | 3.981799  | -1.366932 | 1.345702  |
| H | 3.160119  | -1.008044 | 1.955516  |
| C | 5.202360  | -1.686083 | 1.945453  |
| H | 5.318800  | -1.565774 | 3.018422  |
| C | 6.258879  | -2.167430 | 1.168586  |
| H | 7.207378  | -2.418576 | 1.635011  |
| C | 6.089312  | -2.341225 | -0.209099 |
| H | 6.904321  | -2.728949 | -0.813911 |
| C | 4.870922  | -2.022647 | -0.810685 |
| H | 4.742185  | -2.170921 | -1.878957 |
| C | -2.317253 | 1.715289  | 0.849163  |
| C | -3.694702 | 1.617320  | 1.079325  |
| C | -1.477205 | 2.107825  | 1.897836  |
| C | -4.226744 | 1.924930  | 2.332105  |
| C | -2.005728 | 2.396540  | 3.158125  |
| C | -3.383347 | 2.313043  | 3.376763  |
| H | -4.348099 | 1.289763  | 0.276186  |
| H | -0.408091 | 2.171264  | 1.726198  |
| H | -5.296689 | 1.838033  | 2.497913  |
| H | -1.341574 | 2.689024  | 3.966913  |
| H | -3.795681 | 2.539841  | 4.355917  |
| C | -1.981528 | 4.020742  | -0.921260 |
| C | -3.273455 | 4.518570  | -0.710300 |
| C | -0.880028 | 4.776811  | -0.503479 |
| C | -3.462433 | 5.745162  | -0.072202 |
| C | -1.068772 | 6.006906  | 0.130510  |
| C | -2.359830 | 6.491922  | 0.352988  |
| H | -4.131675 | 3.937484  | -1.037394 |
| H | 0.124438  | 4.409609  | -0.682624 |
| H | -4.469539 | 6.118967  | 0.089609  |
| H | -0.205864 | 6.584950  | 0.449985  |
| H | -2.506624 | 7.447485  | 0.848423  |
| H | -6.032184 | 1.453229  | -2.206469 |
| C | -5.595922 | -0.523975 | -1.452512 |
| C | -5.410665 | 0.567603  | -2.307565 |
| C | -4.418119 | 0.514345  | -3.291487 |
| H | -4.267047 | 1.357907  | -3.959828 |
| C | -3.607040 | -0.618015 | -3.409273 |
| H | -2.816565 | -0.644842 | -4.155394 |
| H | -2.031508 | -2.736534 | -3.276444 |
| C | -2.923857 | -2.945551 | -2.680357 |
| H | -3.471011 | -3.771730 | -3.142954 |
| C | -3.795051 | -1.714772 | -2.560610 |
| H | -4.939952 | -2.508965 | -0.921500 |
| C | -4.799737 | -1.663200 | -1.586481 |
| H | -6.351242 | -0.490954 | -0.672751 |
| O | -2.537909 | -3.477355 | -1.390169 |
| C | -1.721613 | -2.683080 | -0.657322 |
| C | -1.574025 | -4.634473 | 0.989434  |
| H | -1.865924 | -4.831865 | 2.026274  |
| H | -0.611301 | -5.134726 | 0.808024  |
| H | -2.330739 | -5.089771 | 0.350779  |
| C | -1.499323 | -3.140492 | 0.710533  |
| H | -2.647986 | -2.722837 | 1.467704  |
| N | -0.510899 | -2.362896 | 1.383399  |
| C | 0.029413  | -2.780748 | 2.484532  |

|   |           |           |           |
|---|-----------|-----------|-----------|
| H | -0.158680 | -3.788986 | 2.856926  |
| C | 0.909507  | -1.945767 | 3.309088  |
| C | 0.795280  | -0.542031 | 3.338603  |
| H | 0.007963  | -0.059398 | 2.768492  |
| H | 1.554557  | 1.304746  | 4.136368  |
| C | 1.660449  | 0.223663  | 4.119367  |
| C | 2.654800  | -0.395439 | 4.884639  |
| H | 3.330864  | 0.203005  | 5.488445  |
| C | 2.760402  | -1.790305 | 4.882742  |
| H | 3.522724  | -2.279057 | 5.482909  |
| C | 1.888125  | -2.558852 | 4.112044  |
| H | 1.974633  | -3.642564 | 4.111473  |
| O | -5.040511 | -3.648863 | 1.126841  |
| C | -4.988649 | -2.592810 | 1.721694  |
| O | -5.650843 | -1.625503 | 2.029494  |
| O | -3.428559 | -2.474074 | 2.329027  |
| C | -3.052362 | -1.284631 | 3.031324  |
| H | -2.475421 | -0.616202 | 2.386880  |
| H | -3.957845 | -0.770953 | 3.354979  |
| H | -2.448695 | -1.563857 | 3.901692  |
| O | -1.281891 | -1.631100 | -1.140302 |

## CO2

|                                             |             |
|---------------------------------------------|-------------|
| Charge                                      | 0           |
| Electronic Energy, BS1 (a.u.)               | -188.575589 |
| Thermal and entropic correction, BS1 (a.u.) | -0.006986   |
| Electronic Energy, BS2 (a.u.)               | -188.669139 |
| Number of Imaginary Frequencies             | 0           |
| Imaginary frequencies (cm-1)                | None        |

### Molecular Geometry in Cartesian Coordinates

|   |           |           |           |
|---|-----------|-----------|-----------|
| O | 1.152839  | 0.002447  | 0.000000  |
| C | -0.000000 | 0.000681  | 0.000000  |
| O | -1.152839 | -0.002958 | -0.000000 |

## 45\_MeOCO2

|                                             |             |
|---------------------------------------------|-------------|
| Charge                                      | -1          |
| Electronic Energy, BS1 (a.u.)               | -303.817307 |
| Thermal and entropic correction, BS1 (a.u.) | 0.025829    |
| Electronic Energy, BS2 (a.u.)               | -303.791447 |
| Number of Imaginary Frequencies             | 0           |
| Imaginary frequencies (cm-1)                | None        |

### Molecular Geometry in Cartesian Coordinates

|   |           |           |           |
|---|-----------|-----------|-----------|
| O | 0.472485  | 1.298759  | 0.000026  |
| C | 0.650131  | 0.061889  | -0.000003 |
| O | 1.687813  | -0.625748 | -0.000019 |
| O | -0.539871 | -0.750222 | 0.000028  |
| C | -1.759400 | -0.033323 | -0.000058 |
| H | -2.567895 | -0.775402 | 0.001066  |
| H | -1.869614 | 0.611531  | 0.883540  |
| H | -1.870296 | 0.610161  | -0.884512 |

## MeOCO2H

|                                             |             |
|---------------------------------------------|-------------|
| Charge                                      | 0           |
| Electronic Energy, BS1 (a.u.)               | -304.314786 |
| Thermal and entropic correction, BS1 (a.u.) | 0.038855    |
| Electronic Energy, BS2 (a.u.)               | -304.275870 |
| Number of Imaginary Frequencies             | 0           |
| Imaginary frequencies (cm-1)                | None        |

**Molecular Geometry in Cartesian Coordinates**

|   |           |           |           |
|---|-----------|-----------|-----------|
| H | 1.501082  | -1.487327 | 0.001555  |
| O | 1.677293  | -0.530371 | -0.000031 |
| C | 0.515999  | 0.141409  | -0.000072 |
| O | 0.455911  | 1.349017  | 0.000027  |
| O | -0.528591 | -0.704286 | -0.000402 |
| C | -1.829233 | -0.076722 | 0.000192  |
| H | -2.548167 | -0.896097 | 0.002430  |
| H | -1.954113 | 0.541744  | 0.892642  |
| H | -1.956299 | 0.538674  | -0.894099 |

## 5. References

- (1). Frisch, M. J.; Trucks, G. W.; Schlegel, H. B.; Scuseria, G. E.; Robb, M. A.; Cheeseman, J. R.; Scalmani, G.; Barone, V.; Mennucci, B.; Petersson, G. A.; Nakatsuji, H.; Caricato, M.; Li, X.; Hratchian, H. P.; Izmaylov, A. F.; Bloino, J.; Zheng, G.; Sonnenberg, J. L.; Hada, M.; Ehara, M.; Toyota, K.; Fukuda, R.; Hasegawa, J.; Ishida, M.; Nakajima, T.; Honda, Y.; Kitao, O.; Nakai, H.; Vreven, T.; Montgomery, J. A., Jr.; Peralta, J. E.; Ogliaro, F.; Bearpark, M.; Heyd, J. J.; Brothers, E.; Kudin, K. N.; Staroverov, V. N.; Keith, T.; Kobayashi, R.; Normand, J.; Raghavachari, K.; Rendell, A.; Burant, J. C.; Iyengar, S. S.; Tomasi, J.; Cossi, M.; Rega, N.; Millam, J. M.; Klene, M.; Knox, J. E.; Cross, J. B.; Bakken, V.; Adamo, C.; Jaramillo, J.; Gomperts, R.; Stratmann, R. E.; Yazyev, O.; Austin, A. J.; Cammi, R.; Pomelli, C.; Ochterski, J. W.; Martin, R. L.; Morokuma, K.; Zakrzewski, V. G.; Voth, G. A.; Salvador, P.; Dannenberg, J. J.; Dapprich, S.; Daniels, A. D.; Farkas, Ö.; Foresman, J. B.; Ortiz, J. V.; Cioslowski, J.; Fox, D. J., *Gaussian 09, revision D.01*. Gaussian, Inc.: Wallingford, CT, 2010.
- (2). Marenich, A. V.; Cramer, C. J.; Truhlar, D. G., Universal Solvation Model Based on Solute Electron Density and on a Continuum Model of the Solvent Defined by the Bulk Dielectric Constant and Atomic Surface Tensions. *J. Phys. Chem. B* **2009**, *113*, 6378-6396.
- (3). (a) Lee, C.; Yang, W.; Parr, R. G., Development of the Colle-Salvetti correlation-energy formula into a functional of the electron density. *Phys. Rev. B* **1988**, *37*, 785-789; (b) Becke, A. D., Density-functional thermochemistry. III. The role of exact exchange. *J. Phys. Chem.* **1993**, *98*, 5648-5652.
- (4). Grimme, S.; Antony, J.; Ehrlich, S.; Krieg, H., A consistent and accurate ab initio parametrization of density functional dispersion correction (DFT-D) for the 94 elements H-Pu. *J. Phys. Chem.* **2010**, *132*, 154104.
- (5). (a) Francl, M. M.; Pietro, W. J.; Hehre, W. J.; Binkley, J. S.; Gordon, M. S.; DeFrees, D. J.; Pople, J. A., Self-consistent molecular orbital methods. XXIII. A polarization-type basis set for second-row elements. *J. Phys. Chem.* **1982**, *77*, 3654-3665; (b) Hehre, W. J.; Ditchfield, R.; Pople, J. A., Self-Consistent Molecular Orbital Methods. XII. Further Extensions of Gaussian-Type Basis Sets for Use in Molecular Orbital Studies of Organic Molecules. *J. Phys. Chem.* **1972**, *56*, 2257-2261.
- (6). Andrae, D.; Häußermann, U.; Dolg, M.; Stoll, H.; Preuß, H., Energy-adjusted ab initio pseudopotentials for the second and third row transition elements. *Theor. Chim. Acta* **1990**, *77*, 123-141.
- (7). Ehlers, A.; Böhme, M.; Dapprich, S.; Gobbi, A.; Höllwarth, A.; Jonas, V.; Köhler, K.; Stegmann, R.; Veldkamp, A.; Frenking, G., A set of f-polarization functions for pseudo-potential basis sets of the transition metals Sc-Cu, Y-Ag and La-Au. *Chem. Phys. Lett.* **1993**, *208*, 111-114.
- (8). (a) Weigend, F., Accurate Coulomb-fitting basis sets for H to Rn. *Phys. Chem. Chem. Phys.* **2006**, *8*, 1057-1065; (b) Weigend, F.; Ahlrichs, R., Balanced basis sets of split valence, triple zeta valence and quadruple zeta valence quality for H to Rn: Design and assessment of accuracy. *Phys. Chem. Chem. Phys.* **2005**, *7*, 3297-3305.
- (9). Grimme, S., Supramolecular Binding Thermodynamics by Dispersion-Corrected Density Functional Theory. *Chem. Eur. J.* **2012**, *18*, 9955-9964.
- (10). Besora, M.; Vidossich, P.; Lledos, A.; Ujaque, G.; Maseras, F., Calculation of Reaction Free Energies in Solution: A Comparison of Current Approaches. *J. Phys. Chem. A* **2018**, *122*, 1392-1399.
- (11). Luchini, G.; Alegre-Requena, J.; Funes-Ardoiz, I.; Paton, R., GoodVibes: automated thermochemistry for heterogeneous computational chemistry data [version 1; peer review: 2 approved with reservations]. *F1000Research* **2020**, *9*.
